# Supplementary material for: Coupling effect of key factors on ecosystem services in border areas: a study of the Pu’er region, Southwestern China
Source: PeerJ. 2024 Mar 22;12:e17015. doi: 10.7717/peerj.17015 (PMC10962348; doi:10.7717/peerj.17015)
Supplement: Supplemental Information 3 [file peerj-12-17015-s003.xls]

## Sheet: Sheet1
Tem	precipitation	SPI	worldpop	slope	LUCC	protection	CONTAG	accessibility	Food_Availability	agnps	soil_conservation	tourism_and_recreation	biodiversity	NDVI	economic_transaction	pest_diseases	invasion	cultural_interaction	longitude	latitude	FID
19.6928	1152.76	-0.758037	933.276	16.3856	2	0	23.9264	0.427249	0.000306631	119.738	3.00814e+08	0.200827	26793	0.238967	0	0	1	1938.12	99.692	22.0964	0
19.2045	1159.42	-0.871816	981.598	18.3737	2	0	24.211	0.552643	0.000306631	181.817	4.24787e+08	0.288336	25320	0.259508	0	18	1	2805.73	99.7554	22.0973	1
18.8174	1162.06	-0.655043	1150.9	16.9357	2	0	25.138	0.657263	0.000329406	148.137	3.43696e+08	0.288348	34203	0.256225	0	18	1	5184.85	99.8187	22.0982	2
17.7632	1160.41	-0.703089	761.103	18.7345	2	0	22.7451	0.616473	0.000295065	110.216	4.14378e+08	0.26617	25473	0.252364	0	17	1	3120.6	99.8821	22.099	3
20.1371	1167.33	-0.996835	751.898	17.451	2	0	23.8188	0.477094	0.000367347	171.145	2.95418e+08	0.240086	39722	0.298733	0	17	1.75	4437.77	99.9454	22.0998	4
22.8382	1119.67	-0.274431	1996.63	15.9968	1	0	28.6797	0	0.000321763	2331.86	1.08753e+08	0	7831	0	28500	3	0	201.524	99.1843	22.1449	5
21.7176	1122.58	-0.217139	1663.61	18.4269	2	0	29.3632	0.16667	0.000300303	3696.49	2.1915e+08	0.075641	7255	0.304035	33820	13	1	3056.64	99.2477	22.146	6
18.8907	1167.7	-0.377273	873.289	21.0746	2	0	30.5466	0.364438	0.000371986	1866.81	4.17528e+08	0.203145	2613	0.312888	0	13	1	4186.63	99.311	22.1471	7
15.9555	1196.69	-0.253747	595.202	20.5065	2	0	37.5728	0.470293	0.000401745	0	4.67059e+08	0.32162	7071	0.294479	0	18	1	4691.85	99.3743	22.1481	8
17.9769	1176.37	-0.357219	807.15	15.5152	2	0	29.4474	0.514635	0.000431061	570.323	3.81923e+08	0.213443	11759	0.263538	0	18	1.75	3412.03	99.4377	22.1491	9
17.3512	1179.31	-0.40641	823.33	21.4738	2	0	25.8849	0.388538	0.000372147	259.495	5.26881e+08	0.26181	11504	0.228704	0	0	2	2561.4	99.501	22.1501	10
20.6052	1154.97	-0.561116	4221.1	13.1561	1	0	30.798	0.266284	0.000390673	3635.56	2.56188e+08	0.107201	39444	0.217817	127680	0	2	3871.19	99.5644	22.151	11
20.8401	1151.07	-0.463934	2216.49	13.9948	1	0	27.3658	0.281762	0.000490875	499.353	2.1188e+08	0.112705	32010	0.219592	43320	0	2	5239.52	99.6278	22.152	12
20.3792	1154.34	-0.56898	1170.97	17.761	2	0	21.8362	0.345662	0.000437321	82.9667	3.5071e+08	0.149244	24892	0.299238	0	0	1	7052.51	99.6911	22.1529	13
20.165	1161.93	-0.770667	872.734	15.7368	2	0	21.339	0.454252	0.000467719	19.0993	3.39035e+08	0.191825	38893	0.230575	0	18	1	9042.89	99.7545	22.1538	14
19.8021	1166.63	-0.492802	970.681	13.9723	2	0	24.0018	0.525684	0.000485885	54.498	3.24026e+08	0.21163	51363	0.214042	0	18	1	10854.7	99.8178	22.1546	15
19.3916	1164.35	-0.6879	468.811	16.3427	2	0	20.0198	0.538221	0.00039243	11.9613	3.51446e+08	0.215289	37155	0.267531	0	17	1	9371.08	99.8812	22.1555	16
20.3839	1171.87	-0.637718	591.098	18.2687	2	0	25.5584	0.471172	0.000431183	19.5012	3.3182e+08	0.284527	43142	0.307683	0	17	2.5	10550	99.9446	22.1563	17
20.5796	1169.19	-0.612668	1144.78	15.7014	1	0.147847	29.2264	0.483623	0.00044362	2654.98	2.54005e+08	0.272304	40180	0.282958	0	0	3	11784.8	100.008	22.1571	18
22.6056	1123.8	-0.128991	6347.01	16.0823	1	0	26.7245	0.0638239	0.000440892	12229.4	1.78875e+08	0.0263531	8833	0.280183	87685	9.5	1	4600.97	99.2466	22.2024	19
21.629	1129.27	-0.186409	2826.31	16.4783	1	0	32.2555	0.22292	0.000272721	11883.5	2.11812e+08	0.0586782	4025	0.321167	28595	9.5	1	9417.34	99.3099	22.2035	20
19.4239	1153.3	-0.327525	5002.56	18.15	2	0	38.0334	0.298065	0.000332018	5198.41	4.13658e+08	0.142302	5054	0.286992	65455	17	1.5	10864.5	99.3733	22.2045	21
19.4472	1159.88	-0.373644	1813.28	16.8363	2	0	35.5298	0.418891	0.000337546	3343.52	2.96105e+08	0.199571	11332	0.3174	39710	17	2	8711.32	99.4367	22.2055	22
17.67	1177.08	-0.286922	738.858	19.0772	2	0	29.1327	0.409383	0.000423913	204.536	4.58513e+08	0.279654	8837	0.304742	0	17	2	8435.42	99.5	22.2065	23
20.3374	1161.96	-0.229244	2338.66	15.2803	1	0	25.7237	0.290861	0.000500865	2921.19	2.72853e+08	0.144117	34912	0.259363	64695	17	2	10118.4	99.5634	22.2075	24
20.8895	1159.74	-0.266113	1861.45	14.2912	1	0	23.9607	0.299723	0.000242261	402.457	2.5318e+08	0.127624	39611	0.2766	48165	17	2	10792.8	99.6268	22.2084	25
19.5185	1165.03	-0.372559	1065.29	16.1144	2	0	21.5191	0.390938	0.000413687	21.6911	3.26867e+08	0.163437	28377	0.306587	0	17	1.5	12492.8	99.6902	22.2093	26
20.058	1172.49	-0.387996	1173.72	15.1195	2	0	21.2874	0.484493	0.000298446	16.4381	3.49686e+08	0.187546	37303	0.274767	0	18	1	15295.3	99.7536	22.2102	27
19.8261	1172.57	-0.263097	967.388	12.4644	2	0	22.6334	0.49091	0.0003257	52.8348	3.46809e+08	0.190029	54465	0.243317	0	18	1	16555	99.817	22.2111	28
18.9923	1170.47	-0.479054	850.996	15.3029	2	0	23.7723	0.525695	0.000343526	87.6376	3.34621e+08	0.230627	36165	0.242383	0	17	1	15625.9	99.8804	22.2119	29
20.0518	1182.51	-0.384494	770.47	16.7857	2	0	28.4196	0.483968	0.000312392	262.733	2.92583e+08	0.269773	50155	0.323458	0	17	2.5	16610.5	99.9438	22.2127	30
19.5179	1175.47	-0.378377	1119.89	15.6239	2	0.236555	29.6875	0.461054	0.00036964	1861.99	3.23316e+08	0.208218	26102	0.259017	0	14	2	17677.2	100.007	22.2135	31
21.0294	1185.78	-0.355922	1659.02	16.7927	1	0.0887083	23.4692	0.414722	0.000483787	2035.3	2.17667e+08	0.160537	30504	0.238567	0	13.3333	3	20290.6	100.071	22.2143	32
22.3996	1134.86	-0.445305	919.329	17.6648	1	0	26.5042	0.226012	0.000380051	8790.82	1.55668e+08	0.0947793	5439	0.309358	38190	9	1	1223.03	99.2455	22.2589	33
20.0473	1155.02	-0.333933	1408.15	16.7695	1	0	33.4235	0.365115	0.000336549	9366.31	2.5517e+08	0.180324	3592	0.2815	31160	9	1	7662.12	99.3089	22.2599	34
20.3356	1157.59	-0.059131	8029.07	15.0851	2	0.118278	29.3909	0.377086	0.000629828	7658.11	3.55814e+08	0.168425	6696	0.288967	75240	17	1.33333	13767.1	99.3722	22.261	35
20.2597	1158.49	-0.0304206	1954.33	15.7224	2	0.147847	38.5819	0.364988	0.000468712	6742.23	2.68201e+08	0.185133	19109	0.319646	26600	17	2	14675.6	99.4356	22.262	36
19.2192	1167.04	-0.124198	841.655	16.2164	2	0	33.9409	0.412855	0.000373452	1561.65	2.94446e+08	0.251137	12441	0.306892	6650	17	2	14599.3	99.499	22.263	37
20.2796	1166.12	-0.0743006	2337.44	14.4599	1	0	30.8589	0.281125	0.00039695	2829.33	2.4487e+08	0.134215	23120	0.279383	74575	17	2	16372.2	99.5624	22.2639	38
20.3375	1172.42	-0.133888	2709.37	16.2486	1	0	31.8336	0.343947	0.000548587	462.374	2.3995e+08	0.152865	26386	0.280783	32775	17	2	16833.9	99.6259	22.2649	39
20.0126	1176.16	-0.162434	1741.73	17.6435	2	0	32.5499	0.376588	0.000337982	119.239	2.97398e+08	0.150982	28493	0.331696	8835	17	1.75	18379.4	99.6893	22.2658	40
18.9389	1179.55	-0.457187	954.937	15.6468	2	0	24.6262	0.546766	0.000456467	23.3405	3.69982e+08	0.21949	42917	0.27985	0	18	1	21058.9	99.7527	22.2667	41
19.0019	1182.16	-0.345693	1246.21	12.9366	2	0	23.1537	0.561414	0.000491088	94.9835	3.56573e+08	0.217322	55636	0.223308	0	18	1.5	22511.9	99.8161	22.2675	42
18.916	1180.78	-0.393466	955.151	16.7581	2	0	23.8889	0.549412	0.000502642	104.88	3.45389e+08	0.243058	32034	0.253317	0	17	2	21881.3	99.8795	22.2684	43
19.3936	1184.19	-0.432849	777.73	17.774	2	0	24.6868	0.428669	0.000366699	59.5431	3.5238e+08	0.227394	42821	0.25775	0	17	2	22646.3	99.9429	22.2692	44
20.4091	1188.83	-0.554991	1120.69	17.702	2	0	28.5978	0.371728	0.00052872	1534.39	3.16929e+08	0.174729	35339	0.235808	0	14	3	23756.2	100.006	22.27	45
20.7823	1193.25	-0.478267	4064.12	13.6896	1	0	30.1372	0.359087	0.000555658	2973.07	2.51074e+08	0.14415	50192	0.253117	0	13.3333	2.25	25875.2	100.07	22.2708	46
20.6057	1185.35	-0.607046	1970.6	12.452	1	0	26.9523	0.377981	0.000422076	2089.48	3.27557e+08	0.199521	40642	0.244067	0	12	1	29105	100.133	22.2715	47
19.1911	1165.21	-0.475998	546.821	17.219	2	0	25.5821	0.435632	0.000288553	114.104	2.42188e+08	0.324292	11055	0.294175	0	12	2	33319.5	100.197	22.2722	48
20.0829	1164.47	-0.661141	1077.74	12.5334	2	0	32.5247	0.341095	0.000418248	236.602	2.82691e+08	0.186052	36324	0.342879	0	0	1.66667	43509.7	100.324	22.2736	49
21.6804	1150.04	-0.566629	1142.57	16.2575	1	0	26.212	0.298701	0.000267444	12994.5	2.04361e+08	0.129642	5727	0.307958	0	7	1	4727.76	99.3078	22.3164	50
19.2891	1181.7	-0.436783	1352.5	17.591	2	0.0295694	30.6247	0.534658	0.000400169	7649.95	3.24076e+08	0.198686	7419	0.2943	0	15.5	1.33333	10293.4	99.3712	22.3174	51
19.0728	1186.15	-0.431348	1601.56	17.7801	2	0.206986	31.6044	0.515403	0.000383716	7845.02	3.01052e+08	0.226112	15611	0.265171	21755	15.5	2	16577.8	99.4346	22.3184	52
19.7501	1181.29	-0.342284	1036.75	17.1288	1	0	29.3901	0.449577	0.000523525	2414.71	2.92647e+08	0.167069	17072	0.27845	46455	17.5	2	20771.3	99.498	22.3194	53
20.8243	1179.49	-0.173505	28463.4	12.3834	2	0	41.458	0.265125	0.000358541	1191.44	4.05042e+08	0.105647	27915	0.3048	586625	17.5	2	22322.7	99.5615	22.3204	54
20.9543	1188.36	-0.290513	11910.6	12.9352	2	0	31.048	0.251565	0.000355927	1532.4	3.1087e+08	0.132437	35478	0.306267	414010	17.5	2	22990.1	99.6249	22.3213	55
19.7033	1191.84	-0.4079	1113.14	17.4213	1	0	37.5887	0.403775	0.000448782	309.705	2.89324e+08	0.19277	24398	0.284371	0	17.5	2	24449.9	99.6883	22.3222	56
18.7762	1191.35	-0.272853	1584.81	15.7809	2	0	40.3261	0.570466	0.000346435	297.84	3.30115e+08	0.238492	40821	0.260358	0	17.5	2	26582.6	99.7518	22.3231	57
19.049	1193.98	0.106093	972.259	16.4958	2	0	29.9665	0.567364	0.000340846	65.5446	3.65405e+08	0.219625	49957	0.276633	0	17.5	2	28596.7	99.8152	22.324	58
20.019	1202.09	-0.00940501	954.353	19.3932	2	0	24.1665	0.476896	0.000371954	87.7346	3.3489e+08	0.190971	30353	0.291438	0	16.5	3	28136.9	99.8787	22.3248	59
20.4887	1206.09	-0.383786	2046.91	17.764	2	0	25.5065	0.337012	0.00033225	160.833	3.43332e+08	0.156548	37419	0.277625	0	16.5	3	28769.4	99.9421	22.3257	60
20.4255	1202.52	-0.51876	1623.05	14.4216	2	0	27.212	0.354995	0.000417913	1177.91	3.1551e+08	0.175894	30846	0.247575	0	15.5	3	29908.2	100.006	22.3265	61
19.8228	1195.43	-0.411123	1269.81	16.2777	2	0	29.427	0.464004	0.00034342	1786.55	3.44271e+08	0.227512	34278	0.225092	0	14.4	2.5	31631.5	100.069	22.3272	62
18.797	1176.98	-0.450593	1803.27	12.4001	2	0	28.768	0.49992	0.000305089	1297.93	3.37182e+08	0.247702	39496	0.277633	0	10.6	1	34398.3	100.132	22.328	63
18.9006	1171.84	-0.52482	2855.46	13.3055	2	0	27.6048	0.500381	0.0003105	2067.42	3.23379e+08	0.290544	33798	0.292462	0	11.5	1.5	38030.7	100.196	22.3287	64
18.6396	1164.39	-0.456174	1213.97	14.226	2	0	28.3417	0.479565	0.000301087	239.264	3.20597e+08	0.274745	33986	0.282967	0	13	1	42367.5	100.259	22.3294	65
19.368	1175.47	-0.518673	1382.02	14.7044	2	0	26.445	0.400464	0.000425957	389.841	2.84515e+08	0.206691	33813	0.372425	0	13	1.5	47214.8	100.323	22.33	66
20.9749	1008.89	-0.113928	391.699	17.253	2	0	24.8091	0.274452	0.000458391	155.091	1.36146e+08	0.204306	21719	0.376775	0	0	2	5584.06	101.593	22.3382	67
21.8846	1155.64	-0.488484	1151.37	16.7966	1	0	24.0765	0.268643	0.000360353	14137.3	1.93457e+08	0.0854209	7044	0.286021	22515	3	2	3252.92	99.3067	22.3728	68
19.7093	1185.7	-0.374214	2072.39	16.708	2	0	35.4187	0.506946	0.000308341	8209.12	3.28874e+08	0.239845	8447	0.287779	0	14	2	8740.12	99.3701	22.3738	69
18.5603	1202.89	-0.208416	2962.27	15.2623	2	0.0887083	30.1543	0.590732	0.000311886	7272.02	3.41188e+08	0.189244	14887	0.277385	0	14	2	13221.3	99.4336	22.3749	70
18.0617	1209.88	-0.4696	714.983	18.327	1	0.0591388	32.3285	0.557218	0.00042074	12334.6	3.57675e+08	0.31525	13813	0.258942	6745	18	2	17843.7	99.497	22.3759	71
20.1126	1200.31	-0.321482	1324.46	16.6979	1	0	41.1454	0.399602	0.00031339	2490.28	2.75953e+08	0.154685	27252	0.271873	82555	18	2	22735	99.5605	22.3768	72
21.0153	1202.42	-0.102737	3619.54	10.0081	1	0	33.7347	0.273746	0.000298282	2689.15	2.2441e+08	0.120095	56669	0.278787	66405	18	2	28260.5	99.6239	22.3778	73
20.3831	1207.35	-0.218933	2177.51	13.2121	1	0	42.7008	0.386443	0.000294506	1099.28	2.54158e+08	0.174523	33896	0.254825	0	18	2	30595.2	99.6874	22.3787	74
18.9508	1200.65	-0.161874	1902.45	12.8513	1	0	40.5719	0.545038	0.000306134	1042.69	2.75249e+08	0.219422	48942	0.231679	0	17	2	32339.1	99.7509	22.3796	75
19.2232	1205.01	-0.0547892	1956.67	12.9361	1	0	48.9142	0.536668	0.000284474	898.257	2.75948e+08	0.221592	60041	0.256075	0	17	2	34738.8	99.8143	22.3805	76
20.3676	1219.62	0.0399393	1053.16	18.2574	2	0	50.4143	0.432601	0.000287581	147.079	2.81626e+08	0.173899	45165	0.265104	0	16	3	34392.6	99.8778	22.3813	77
20.1015	1215.37	-0.0554687	1180.82	12.6502	2	0	37.7643	0.409676	0.000346688	238.102	2.50375e+08	0.163248	51532	0.305575	0	16	2	34939.6	99.9413	22.3821	78
19.8668	1211.22	-0.403644	1360.51	14.4907	2	0	33.9791	0.496776	0.000330395	355.284	3.20922e+08	0.1923	35160	0.232908	0	17	2	36095.9	100.005	22.3829	79
18.6537	1196.82	-0.42398	996.586	15.4475	2	0.118278	24.0708	0.625797	0.000318391	759.437	4.28183e+08	0.306843	39525	0.237117	0	17	2	37536.2	100.068	22.3837	80
16.88	1170.36	-0.336363	1058.61	16.8402	2	0.354833	23.1183	0.597882	0.000361726	147.986	4.29734e+08	0.351786	17837	0.252225	0	11	1	39970.8	100.132	22.3844	81
17.0432	1162.25	-0.420667	916.558	12.3054	2	0.295694	21.5295	0.590112	0.000513575	46.0055	3.54723e+08	0.399753	21482	0.288725	0	12	1	43136.5	100.195	22.3851	82
17.2942	1161.04	-0.469403	822.608	14.2308	2	0	24.897	0.605927	0.000316741	168.764	3.602e+08	0.318321	30040	0.312375	0	13	1	47004.5	100.259	22.3858	83
17.756	1159.26	-0.50726	722.656	13.8974	2	0	21.1184	0.551636	0.00030266	55.4567	3.41889e+08	0.291833	27699	0.361092	0	13	1	51416.5	100.322	22.3865	84
21.3337	1011.98	-0.141663	880.748	13.814	1	0	28.2031	0.25075	0.000389765	283.479	1.07769e+08	0.15773	28618	0.355212	0	11	3	12174.1	101.529	22.3945	85
21.3411	1005.45	-0.152239	1121.42	16.2219	2	0	25.9901	0.281767	0.000637069	280.796	1.91061e+08	0.151488	43467	0.373633	0	0	2	5721.7	101.592	22.3947	86
21.2595	1178.67	-0.262143	1872	17.6756	1	0	38.5414	0.380552	0.000373426	13246.8	2.32483e+08	0.151643	7572	0.224367	0	16	1.66667	4217.5	99.3691	22.4303	87
19.4207	1206.49	-0.393208	2054.58	18.0987	2	0.0591388	35.34	0.424513	0.000274227	10717.8	3.37376e+08	0.230059	7166	0.298817	0	16	2	8833.75	99.4325	22.4313	88
17.5495	1219.99	-0.384984	561.308	21.5521	2	0	36.1851	0.563601	0.000299001	96.225	4.98776e+08	0.334524	10941	0.241617	0	18	2	13804.4	99.496	22.4323	89
18.6043	1218.2	-0.226463	987.577	17.1651	1	0	46.6587	0.577222	0.000303599	524.543	3.31571e+08	0.277067	21178	0.246654	0	18	2	19656	99.5595	22.4333	90
20.1078	1219.8	-0.342216	1844.53	15.1403	2	0	46.8005	0.384286	0.000368444	2036.21	2.87687e+08	0.191943	31976	0.251933	0	18	2	25839.8	99.623	22.4342	91
20.4092	1222.37	-0.236797	3197.92	11.8879	1	0	40.5522	0.389614	0.000207216	6254.87	2.30326e+08	0.150818	35195	0.222158	0	18	2.25	32165.2	99.6865	22.4351	92
20.079	1228.33	-0.285574	2219.2	8.84592	1	0	43.5171	0.433409	0.000346601	1284.59	2.02555e+08	0.167771	51992	0.191892	0	17	2	38240.8	99.75	22.436	93
19.4496	1217.36	-0.0738743	2329.39	14.3636	1	0	48.7589	0.472549	0.000266297	924.817	3.03281e+08	0.197556	40547	0.226725	0	16.5	2	40688.8	99.8135	22.4369	94
20.46	1235.85	-0.241691	1749.25	19.6387	2	0	48.2975	0.423728	0.000321801	548.121	3.03889e+08	0.174959	46593	0.264421	0	15	2	40648.4	99.8769	22.4378	95
19.9196	1229.59	-0.278287	1716.46	14.2816	1	0	54.5661	0.494182	0.000339628	748.768	2.41067e+08	0.205467	43148	0.257092	0	15	2.25	41135.7	99.9404	22.4386	96
19.1269	1219.08	-0.258196	1906.68	16.711	2	0	48.6529	0.550446	0.000324857	775.326	3.34383e+08	0.233696	33321	0.279483	0	14.5	2.5	42303.7	100.004	22.4394	97
17.7751	1192.53	-0.201637	831.783	18.3837	2	0.177417	27.0753	0.669866	0.000363998	137.274	4.53749e+08	0.369008	26133	0.366375	0	14.5	2.25	43539.1	100.067	22.4401	98
16.308	1166.52	-0.019967	454.439	18.464	2	0.591388	21.2509	0.658359	3.9705e-05	18.563	4.66728e+08	0.336764	19409	0.410642	0	12	1	45686.7	100.131	22.4409	99
16.9478	1164.71	-0.296095	680.935	17.6489	2	0.147847	22.6061	0.59385	0.000377504	19.1347	4.39559e+08	0.306503	16915	0.373554	0	11.75	1.25	48512.3	100.194	22.4416	100
17.5638	1170.79	-0.474259	868.977	16.0396	2	0.0591388	22.6245	0.618242	0.000330362	169.372	3.71986e+08	0.343025	18714	0.337675	0	11.5	2	51981.8	100.258	22.4423	101
15.8811	1139.83	-0.43356	630.371	15.8944	2	0.473111	21.2669	0.568758	0.000319875	18.7238	3.94745e+08	0.271536	15473	0.333908	0	11.8333	1	56003.1	100.322	22.443	102
18.491	1183.57	-0.490991	738.621	13.4638	2	0	27.1755	0.416638	0.000359174	228.491	2.77661e+08	0.2047	28526	0.347792	0	12	2	60466.2	100.385	22.4436	103
20.7689	1197.24	-0.51192	522.041	15.3977	1	0	31.8093	0.441091	2.04773e-05	314.39	1.78999e+08	0.193511	22575	0.404667	0	13	1	65280.5	100.449	22.4443	104
21.7601	1011.18	0.148108	1559.05	15.3327	2	0	30.6971	0.256118	0.000300303	376.19	1.78825e+08	0.144583	33876	0.317958	558	11	2.5	12856.5	101.529	22.451	105
21.185	1001.19	-0.0253578	1157.76	17.9668	2	0	31.9961	0.292013	0.000367347	129.831	2.64813e+08	0.173324	31020	0.295533	0	13	3	6958.9	101.592	22.4512	106
20.5551	1002.02	0.066271	926.845	13.7066	2	0	47.3056	0.301395	0.000367347	116.568	1.48068e+08	0.180307	23364	0.344017	1107	13	3	1352.28	101.656	22.4513	107
20.9442	986.861	-0.0478837	766.495	16.1092	2	0.50268	25.2722	0.246198	0.000306631	146.97	1.52818e+08	0.157616	25746	0.454679	0	12	3	2499.81	101.846	22.4516	108
21.4307	986.994	0.0329454	1678.39	11.5631	1	0	39.8297	0.255792	0.000306631	314.747	1.06434e+08	0.153025	28906	0.445775	0	12	3	1219.86	101.91	22.4517	109
20.678	995.828	0.367624	674.229	14.6856	2	0	66.4782	0.284015	0.000306631	143.359	1.21611e+08	0.177597	23632	0.437925	1422	12	3	2150.27	101.973	22.4517	110
21.0073	1007	0.366657	610.035	17.3629	2	0	63.3205	0.117603	0.000306631	45.6641	1.40139e+08	0.0523521	14131	0.2401	0	16	3	840.922	102.101	22.4517	111
21.6134	1025.07	0.480612	1244.31	18.5064	2	0	49.1904	0.0859246	0.000329406	147.094	1.6332e+08	0.0423324	16988	0.327108	54	16	3	2411.2	102.164	22.4516	112
21.0796	1019.25	0.672073	787.521	20.4941	2	0	26.1744	0.133888	0.000329406	77.2063	1.99171e+08	0.0820603	12842	0.306767	0	16	2.5	2276.75	102.228	22.4516	113
22.0755	1180.39	-0.308652	805.382	18.6447	2	0	50.951	0.36713	0.000383716	3938.38	1.18549e+08	0.159879	3324	0	0	16	2	139.359	99.368	22.4867	114
21.3412	1195.23	-0.346674	2547.2	17.1367	2	0	42.5636	0.365325	0.000383716	8411.98	1.99686e+08	0.160922	7624	0.271171	0	16	2	5264.77	99.4315	22.4877	115
18.9546	1222.28	-0.514954	1868.38	20.0945	2	0.147847	36.3096	0.475419	2.26279e-05	235.217	4.15684e+08	0.294453	6588	0.247258	0	18	2	11740	99.495	22.4887	116
18.741	1228.95	-0.474146	1495.18	17.1215	2	0	51.9626	0.512217	2.26279e-05	332.623	3.82441e+08	0.277589	24014	0.207837	0	18	2	18260.2	99.5585	22.4897	117
19.9474	1230.76	-0.532884	2026.74	16.4208	2	0	41.4068	0.424616	2.26279e-05	426.2	3.13483e+08	0.191762	31655	0.214492	0	18	2	24791.4	99.622	22.4907	118
20.4965	1233.23	-0.40027	3039.83	13.2283	1	0	38.686	0.341871	2.26279e-05	537.658	3.64931e+08	0.171548	39521	0.168883	0	18	2	31326.8	99.6855	22.4916	119
20.0129	1233.75	-0.324377	2329.05	14.0544	1	0	49.1903	0.468877	3.96655e-05	1151.43	3.0562e+08	0.20986	37551	0.160342	0	16	2	37864.2	99.749	22.4925	120
19.5787	1231.07	-0.0339313	2169.78	16.3846	1	0	51.7784	0.478898	4.33315e-05	872.198	3.30898e+08	0.20021	31721	0.137008	0	16	2	44402.6	99.8126	22.4934	121
20.5731	1259.15	0.0293764	9116.95	15.2984	2	0	58.5124	0.305963	4.33315e-05	624.285	3.23e+08	0.082906	43782	0.202071	0	14	2	46904.2	99.8761	22.4942	122
20.2753	1253.47	-0.0170847	2288.51	17.5445	2	0	58.2665	0.413246	4.33315e-05	522.617	2.79175e+08	0.159966	42320	0.261375	0	14	2	47347.5	99.9396	22.495	123
19.2236	1227.28	-0.00421003	2138.08	15.7694	2	0	40.3578	0.504421	4.33315e-05	353.715	3.24187e+08	0.223974	20032	0.344275	0	12	2	48507.5	100.003	22.4958	124
17.1597	1185.76	0.168718	973.625	17.8977	2	0	45.577	0.735419	4.33315e-05	428.475	3.66323e+08	0.339424	21000	0.39765	0	12	1.5	49604.6	100.067	22.4966	125
18.7196	1207.83	-0.07623	702.175	20.9798	2	0	32.0103	0.56308	4.33315e-05	291.746	3.48763e+08	0.26156	22926	0.374533	0	12	1	51499.9	100.13	22.4974	126
19.3341	1209.31	-0.152363	789.584	17.2612	2	0	41.3242	0.464704	1.98513e-05	187.345	2.92902e+08	0.201472	24887	0.370904	0	11	2	54077.8	100.194	22.4981	127
17.3482	1164.53	-0.286065	567.198	17.3592	2	0.177417	20.2394	0.58136	1.98513e-05	56.2607	4.01341e+08	0.247547	14895	0.336583	0	10	2	57210.8	100.257	22.4988	128
17.5513	1170.23	-0.186723	534.249	16.1568	2	0.0887083	24.5504	0.45537	2.04773e-05	117.47	3.51795e+08	0.232931	19256	0.336812	0	11	2	60887.7	100.321	22.4995	129
20.2404	1202.32	-0.363687	691.894	16.7729	2	0	23.8462	0.361998	2.04773e-05	265.773	2.8224e+08	0.180811	41470	0.353675	0	12	1	65016.3	100.384	22.5001	130
19.3174	1183.99	-0.438486	722.676	18.5729	2	0	25.6968	0.431781	2.04773e-05	235.678	3.04391e+08	0.274112	27291	0.44145	0	13	1.5	69516.2	100.448	22.5007	131
19.702	1184.02	-0.483607	825.323	20.4695	2	0.384403	23.416	0.293392	2.04773e-05	131.882	3.00826e+08	0.177928	24485	0.460025	0	14	2	74320	100.511	22.5013	132
22.4748	1187.4	-0.615281	9579.61	15.1481	2	0	24.9327	0.089713	2.04773e-05	280.093	2.39914e+08	0.0583424	34827	0.420092	156660	13	3	79372.5	100.575	22.5019	133
21.0538	1166.44	-0.562562	1376.94	20.0558	2	0	22.1531	0.14999	0.000316741	3.72151	2.60879e+08	0.0947308	17771	0.36675	0	12	3	84629.2	100.639	22.5025	134
21.5055	1008.83	0.043325	1557.46	14.4236	2	0	29.1046	0.277659	0.000300303	261.842	2.09702e+08	0.188091	34174	0.360025	3483	11	2.5	14983.5	101.528	22.5075	135
20.334	1007.06	-0.0872869	942.482	18.9985	2	0	27.9766	0.321526	0.000367347	113.462	2.73696e+08	0.225875	27172	0.328031	0	13	3	8775.55	101.592	22.5077	136
19.8579	1006.58	-0.0542487	1116.04	19.0211	2	0	28.0861	0.274545	0.000367347	31.8432	2.48373e+08	0.197369	26292	0.360887	0	13	3	3669.03	101.656	22.5078	137
21.4307	989.034	-0.152826	1137.51	11.0261	2	0	39.3565	0.181242	0.000367347	279.291	1.21807e+08	0.11693	38711	0.40039	0	12	3	1968.78	101.719	22.508	138
21.2913	985.165	-0.0347697	777.595	14.0714	2	0	37.6288	0.214793	0.000306631	157.362	1.15175e+08	0.135112	25599	0.353175	396	12	3	454.664	101.783	22.5081	139
21.1552	983.83	-0.0575785	1355.83	15.2152	1	0	45.7991	0.273573	0.000306631	266.43	1.74933e+08	0.162631	26382	0.363029	1728	12	3	5278.21	101.846	22.5081	140
20.9792	986.49	0.109533	1452.64	16.3874	2	0	39.2093	0.278943	0.000306631	170.176	1.8595e+08	0.167966	32461	0.329946	3411	12	3	7442.4	101.91	22.5082	141
19.6292	1003.09	0.267726	595.649	19.4602	2	0.53225	26.1549	0.311599	0.000306631	35.3525	2.64451e+08	0.202468	18060	0.304025	162	12	4	7809.06	101.973	22.5082	142
19.1429	1013.54	0.42088	613.634	19.0385	2	0.768805	29.6914	0.278083	0.000306631	4.55603	2.86238e+08	0.153187	16764	0.270092	0	12	3.5	5229.68	102.037	22.5082	143
21.1965	1008.42	0.527281	919.342	18.6662	2	0.177417	26.3151	0.128377	0.000306631	30.7157	2.4641e+08	0.0766712	28628	0.276304	0	16	3	7065.25	102.101	22.5082	144
22.1306	1028.84	0.685311	2611.21	18.4643	2	0	26.0813	0.0941805	0.000329406	25.7354	2.01627e+08	0.0685391	24445	0.296515	7326	16	3	8395.87	102.164	22.5081	145
22.5196	1038.77	0.766158	1388.64	20.7907	2	0	30.2058	0.159585	0.000329406	88.3302	2.09157e+08	0.109136	18904	0.408362	0	16	3	5365.45	102.228	22.508	146
21.8249	1188.59	-0.452613	965.116	18.8791	2	0	50.6847	0.405003	0.000303599	12.1422	1.10276e+08	0.195969	1762	0	0	13	2	342.131	99.3669	22.5431	147
20.2958	1213.18	-0.517247	2454.21	17.5485	2	0	38.2932	0.461428	0.000303599	222.363	2.77185e+08	0.238156	5891	0.277858	0	13	2	5715.19	99.4305	22.5442	148
19.3938	1231.42	-0.579487	1698.46	19.1605	2	0.295694	35.4842	0.506201	2.26279e-05	114.167	3.57574e+08	0.36487	9528	0.330242	0	18	2	11684.7	99.494	22.5452	149
17.9997	1235.32	-0.579686	1251.33	20.3524	2	0.0591388	39.1597	0.517423	2.26279e-05	85.2278	4.89113e+08	0.350513	9863	0.250783	0	18	2	18044.9	99.5575	22.5461	150
19.4472	1240	-0.627553	1661.85	16.1779	1	0	54.3202	0.48024	2.26279e-05	439.499	2.99611e+08	0.234096	26620	0.238242	0	18	2	24500.5	99.621	22.5471	151
19.4626	1242.75	-0.647251	1909.73	21.5724	1	0	44.9913	0.489218	2.26279e-05	496.643	4.11969e+08	0.209665	26843	0.212642	0	18	2	30992	99.6846	22.548	152
19.0697	1242.18	-0.617808	1918.8	19.7958	2	0	51.6215	0.555359	4.33315e-05	713.825	3.57383e+08	0.277391	25642	0.206285	0	16	2	37498.8	99.7481	22.5489	153
18.5167	1236.11	-0.272632	1344.32	18.6949	2	0	40.3051	0.567894	4.33315e-05	667.573	4.65469e+08	0.276823	30733	0.174542	0	16	2	44014.5	99.8117	22.5498	154
19.9381	1259.46	-0.119124	5215.92	16.2794	1	0	54.1363	0.415934	4.33315e-05	882.922	3.42808e+08	0.155455	39608	0.193919	0	13.5	2	50536.2	99.8752	22.5507	155
20.8564	1285.74	-0.12645	61074.8	11.7438	2	0	57.2513	0.329366	4.33315e-05	499.764	2.27032e+08	0.0588446	34678	0.277604	0	13.5	2	53569.6	99.9388	22.5515	156
18.7247	1222.12	-0.223241	1802.58	16.6594	2	0	41.9933	0.537634	4.33315e-05	467.395	3.33718e+08	0.251175	23233	0.300621	0	11.5	2	54597.5	100.002	22.5523	157
17.4805	1197.72	0.155306	823.911	16.9391	2	0	48.3399	0.714035	4.33315e-05	423.717	3.52984e+08	0.285614	21058	0.254158	0	11.5	1.75	55712.2	100.066	22.5531	158
19.9152	1238.79	-0.0354551	988.975	18.9863	2	0	65.3045	0.496337	4.33315e-05	565.008	2.87795e+08	0.204939	26816	0.243488	0	12	1.5	57406.2	100.129	22.5538	159
18.7021	1193.95	-0.296872	843.13	14.7025	2	0	30.3367	0.543054	2.04773e-05	220.381	3.29349e+08	0.210214	26242	0.25475	0	10.75	1.75	59771.5	100.193	22.5545	160
18.5247	1194.45	-0.43896	851.846	14.3729	2	0	26.3681	0.549506	2.04773e-05	150.607	3.43269e+08	0.226893	32202	0.272454	0	9.5	2	62628.3	100.257	22.5552	161
19.7561	1209.22	-0.499936	731.253	16.8909	2	0	24.4173	0.438276	2.04773e-05	268.372	3.20741e+08	0.223945	31616	0.262923	0	10.5	2	66004.1	100.32	22.5559	162
20.9279	1212.67	-0.285066	797.327	18.9339	2	0	24.4251	0.351992	2.04773e-05	332.286	2.85897e+08	0.151827	35544	0.291487	0	10.8333	1.5	69830.9	100.384	22.5566	163
21.1238	1202.82	-0.308431	940.063	19.3232	2	0.177417	27.9505	0.300668	2.04773e-05	398.116	2.60161e+08	0.148976	28522	0.324204	0	11.5	1.5	74038.8	100.447	22.5572	164
21.1362	1185.13	-0.451981	5527.71	21.2175	2	0.739236	32.8882	0.173715	2.04773e-05	45.4842	2.65558e+08	0.0986255	26582	0.357735	38955	12.5	2	78566.5	100.511	22.5578	165
22.5441	1186.82	-0.438882	5759.89	16.6917	2	0	32.6662	0.0743855	2.04773e-05	118.392	2.2264e+08	0.0357051	39069	0.415304	19110	12.25	2.5	83362.1	100.574	22.5584	166
20.2925	1165.69	-0.383907	1330.18	16.7367	2	0	40.2775	0.249983	0.000316741	347.43	2.73365e+08	0.148377	29032	0.417606	0	12.5	1.5	88381.8	100.638	22.5589	167
20.4595	1160.96	-0.661803	927.895	13.6017	2	0	34.8268	0.358133	0.000316741	511.442	2.47733e+08	0.158437	41439	0.350233	0	12.2	2	93589.6	100.702	22.5595	168
18.8236	1120.72	-0.851487	568.347	16.3322	2	0	35.5413	0.465619	0.000316741	280.177	2.17418e+08	0.291816	31975	0.381467	0	10	3	79358.6	100.892	22.5609	169
19.7445	1122.31	-0.669099	664.616	16.9434	2	0	29.8869	0.31269	0.000513575	80.2536	1.96357e+08	0.227843	28373	0.401004	0	10	3	72977	100.956	22.5613	170
20.8456	1087.12	-0.661161	477.281	17.5751	2	0.561819	23.5445	0.453381	0.000361726	263.05	2.10763e+08	0.300861	15124	0.398417	0	10	3	60308.9	101.083	22.5621	171
20.0983	1078.37	-0.578273	344.374	16.9545	2	0.768805	20.6301	0.450003	0.000361726	61.1034	2.47627e+08	0.329035	22544	0.465817	0	10	3	54048.9	101.147	22.5624	172
19.3236	1063.64	-0.363684	346.674	15.9917	2	0.916652	20.7088	0.377334	0.000361726	2.63874	2.22822e+08	0.29213	34971	0.440442	0	12	3	47864.2	101.21	22.5628	173
19.7283	1055.39	-0.354674	478.197	15.0462	2	0.50268	24.9947	0.31275	0.000361726	218.438	2.12674e+08	0.224194	39435	0.417588	0	13	3	41788.1	101.274	22.5631	174
20.4993	1041.56	-0.395226	634.608	15.8885	2	0	27.6203	0.281196	0.000361726	220.088	1.6564e+08	0.171869	22248	0.407833	0	11	3	35567	101.337	22.5633	175
21.4397	1021.7	-0.284883	2708.1	14.8251	2	0.0591388	26.2924	0.247798	0.000367347	212.65	1.5001e+08	0.161552	26437	0.357033	450	10.5	2.5	23267	101.465	22.5638	176
19.7542	1019.11	0.119174	1052.58	20.1929	2	0.118278	23.4874	0.301094	0.000367347	32.2053	3.07508e+08	0.22145	21692	0.364258	0	10.5	3	17511.6	101.528	22.564	177
20.0117	1010.91	-0.161029	1122.71	17.6145	2	0.206986	27.5651	0.314964	0.000367347	243.236	2.567e+08	0.204828	25874	0.342529	0	11.5	3	12551.3	101.592	22.5642	178
21.0875	995.543	-0.0858841	1824.68	14.5197	2	0.0887083	32.5056	0.22362	0.000367347	59.2654	2.20897e+08	0.112531	32740	0.261808	864	11.5	2.75	9564.73	101.655	22.5643	179
21.5649	988.729	-0.149373	2603.36	13.7285	2	0	40.7437	0.15307	0.000306631	191.03	2.01119e+08	0.0924348	38764	0.231158	720	13.5	3	7565.04	101.719	22.5645	180
21.4486	985.984	-0.42444	1639.04	14.5842	2	0	33.6942	0.227869	0.000306631	89.8404	1.8088e+08	0.136091	32498	0.289942	0	13.5	3.25	6211.58	101.783	22.5646	181
20.2804	988.325	-0.365127	11681.1	16.1548	2	0	31.4579	0.314376	0.000306631	39.055	1.95507e+08	0.160636	27201	0.309171	44523	13	3.5	9485.32	101.846	22.5646	182
20.3698	988.988	-0.00641812	2518.22	16.4546	2	0	53.3663	0.305078	0.000306631	50.6469	1.93252e+08	0.208634	30638	0.27	4194	13	3.75	13682	101.91	22.5647	183
20.175	988.034	0.0943838	1020.47	13.3419	2	0.0295694	45.0818	0.337521	0.000329406	132.403	1.72282e+08	0.240402	34077	0.244658	0	11.5	4	13076.7	101.973	22.5647	184
20.2711	992.479	0.245722	952.049	16.2991	2	0	27.3937	0.253754	0.000329406	49.225	2.5145e+08	0.170261	23971	0.2807	0	11.5	3.75	11484.2	102.037	22.5647	185
21.2399	1004.87	0.305778	997.13	18.3233	2	0	23.6372	0.124623	0.000329406	21.957	2.19406e+08	0.0945524	29625	0.288883	0	11.5	3	12859	102.101	22.5647	186
21.7035	1009.66	0.27565	983.348	20.3879	2	0	26.3048	0.177157	0.000329406	6.52634	2.47152e+08	0.131439	23043	0.314229	0	9.5	3	13989.7	102.164	22.5646	187
22.0713	1032.25	0.546617	938.696	21.6749	2	0	22.7029	0.219307	0.000329406	0.819095	2.01361e+08	0.169786	18502	0.38505	0	9	3	8372.16	102.228	22.5645	188
22.8381	1043.85	0.436013	571.771	20.9119	2	0	21.0889	0.196516	0.000329406	10.0934	1.21931e+08	0.190177	16987	0.38505	0	0	3	3170.5	102.291	22.5644	189
20.9838	1212.94	-0.695605	2511.11	21.6973	1	0.118278	32.9128	0.435332	0.000303599	416.238	2.73562e+08	0.224688	3438	0.273815	0	11	2	4934.24	99.4294	22.6006	190
21.2515	1216.36	-0.695532	1897.33	20.9114	2	0	43.4793	0.378131	0.000274227	53.7137	2.45576e+08	0.21956	7979	0.359704	0	18	2	11380.2	99.493	22.6016	191
19.7948	1234.81	-0.629262	1059.71	23.3759	2	0.473111	38.9347	0.440299	2.26279e-05	55.9632	3.9942e+08	0.274901	7566	0.323144	0	18	2	17889.4	99.5565	22.6026	192
19.3133	1246.36	-0.76012	2569.19	18.4144	2	0	50.9717	0.487183	2.26279e-05	319.161	3.33119e+08	0.271565	18689	0.299721	0	18	2	24380.6	99.6201	22.6035	193
18.5196	1247.54	-0.529607	1530.68	20.5219	1	0	54.5885	0.629375	2.26279e-05	444.305	4.16207e+08	0.259871	20680	0.253937	0	18	2	30892	99.6836	22.6045	194
18.0429	1239.32	-0.626702	1801.32	20.5764	2	0	44.2839	0.663675	4.33315e-05	751.576	4.39458e+08	0.267183	25945	0.230383	0	16	2	37413.8	99.7472	22.6054	195
18.214	1241.55	-0.306498	1803.29	19.2074	1	0	50.0828	0.622209	1.39037e-05	317.576	4.44804e+08	0.275263	38043	0.214783	0	16	2	42806.7	99.8108	22.6063	196
19.6423	1266.44	-0.297842	4004.07	17.5855	1	0	49.1739	0.481503	1.39037e-05	298.668	3.13965e+08	0.126744	43004	0.260863	0	14	2	47053.7	99.8744	22.6071	197
19.4846	1255.36	-0.25036	5912.56	14.4401	2	0.236555	52.3408	0.48748	1.39037e-05	205.044	3.13555e+08	0.182412	21474	0.249025	0	14	2	51781	99.9379	22.6079	198
17.4662	1211.84	-0.137467	1260.89	20.1343	2	0.325264	44.5721	0.565522	4.33315e-05	139.575	4.2584e+08	0.29772	17630	0.241008	0	13	3	56868.8	100.002	22.6087	199
19.9283	1256.92	0.0266304	1081.05	20.7952	2	0	70.9254	0.486264	3.09833e-05	529.732	3.60238e+08	0.232152	26090	0.191325	0	13	3	61849.4	100.065	22.6095	200
20.6663	1246.35	0.00864714	1155.95	18.0747	2	0	72.9191	0.451849	3.09833e-05	292.514	2.92518e+08	0.174909	21281	0.192175	0	15	2	63379.6	100.129	22.6103	201
20.0103	1230.02	-0.173216	958.309	18.6571	2	0	66.4804	0.436072	3.09833e-05	408.878	2.61839e+08	0.185682	22047	0.182779	0	14.2667	2	65529.9	100.192	22.611	202
21.0844	1239.01	-0.33654	1047.02	17.5909	2	0	39.1979	0.28781	2.04773e-05	179.375	2.678e+08	0.120323	36934	0.269425	0	13	2	68189.5	100.256	22.6117	203
20.2804	1211.45	-0.122956	766.614	18.7461	2	0	23.5668	0.430982	2.04773e-05	96.995	3.79135e+08	0.218607	19003	0.212833	0	11	2	71302.5	100.319	22.6124	204
19.321	1200.89	-0.0555641	930.299	17.0283	2	0.0887083	26.6199	0.46441	2.04773e-05	213.802	3.30925e+08	0.214343	28702	0.225508	0	9	2	74859	100.383	22.613	205
21.7149	1207.18	0.0134281	2891.6	21.1688	2	0.620958	42.4078	0.299275	2.04773e-05	109.214	2.82738e+08	0.150954	24164	0.254867	91875	10	2	78798.8	100.447	22.6137	206
20.9996	1192.49	-0.105515	2295.69	17.4727	2	0.236555	33.5049	0.215854	2.04773e-05	139.899	3.10534e+08	0.105219	34641	0.280062	0	11	2	83067.5	100.51	22.6143	207
21.2517	1185.15	-0.136816	1065.12	15.1827	2	0	37.0687	0.189288	0.000389765	669.98	2.49676e+08	0.0732729	43402	0.351075	0	11.5	1.5	87617	100.574	22.6149	208
21.2843	1175.71	-0.32856	775.916	12.8057	2	0	38.1802	0.294479	0.000316741	490.974	2.36929e+08	0.118214	50551	0.315104	13965	13	1	92405.9	100.637	22.6154	209
20.6981	1162.87	-0.436644	3421.42	13.7854	2	0	53.616	0.432825	0.000316741	848.876	2.15092e+08	0.186161	42095	0.336292	69720	12.3333	1.5	97398.8	100.701	22.6159	210
19.8665	1149.55	-0.202266	2789.76	14.1978	2	0	36.9564	0.476817	0.000316741	452.482	2.75133e+08	0.288397	43849	0.3983	32340	11	2	93522.4	100.765	22.6164	211
19.7422	1135.58	-0.720355	812.035	14.8072	2	0	37.4243	0.482406	0.000316741	663.652	2.6269e+08	0.30625	27220	0.343471	14175	10.5	2.5	87193.5	100.828	22.6169	212
18.8626	1122.65	-0.879734	934.222	14.874	2	0	26.2609	0.470679	0.000513575	1838.89	2.85849e+08	0.270156	39785	0.344483	0	10	3	80898.3	100.892	22.6174	213
19.8882	1123.71	-0.643615	5417.72	16.3721	2	0	29.9958	0.29008	0.000513575	1397.78	2.86369e+08	0.194347	31729	0.330958	60060	10	3	74645.4	100.956	22.6178	214
20.7999	1107.54	-0.510939	4679.86	13.3054	1	0.0591388	28.2549	0.331719	0.000361726	2083.12	1.95081e+08	0.168258	35403	0.3358	61215	10	3	68446.4	101.019	22.6182	215
19.0129	1089.05	-0.557038	751.515	15.6248	2	0.50268	28.1572	0.525008	0.000361726	384.267	2.83991e+08	0.383877	30379	0.378946	0	10	3	62317.4	101.083	22.6186	216
18.9143	1079.89	-0.302427	880.796	13.3554	2	0.177417	29.3283	0.507039	0.000361726	1329.6	2.22121e+08	0.340592	31609	0.389967	0	10	3	56160.1	101.146	22.6189	217
19.2809	1067.89	-0.369015	756.658	15.3978	2	0.147847	26.6646	0.444384	0.000361726	1000	2.3273e+08	0.295873	33641	0.37315	0	12	3	49935.5	101.21	22.6192	218
19.9193	1057.84	-0.159713	965.347	15.7211	2	0	32.1402	0.320541	0.000361726	1292.74	2.08529e+08	0.210936	38805	0.381475	0	13	3	43791.3	101.274	22.6195	219
20.1773	1044.64	-0.407211	899.252	18.1391	2	0	24.4005	0.277118	0.000361726	334.461	2.66533e+08	0.180216	23517	0.374158	0	11	3	37765.9	101.337	22.6198	220
21.2284	1037.09	-0.306007	1579.37	14.7486	2	0	29.9265	0.214801	0.000367347	54.5585	2.06249e+08	0.110865	37791	0.359829	43263	11	3.5	31944	101.401	22.6201	221
20.3882	1024.41	-0.397317	4538.33	21.4147	2	0.709666	23.7902	0.284944	0.000367347	92.4807	3.07518e+08	0.178763	18482	0.313933	2520	10	4	26460.4	101.464	22.6203	222
19.0195	1022.94	-0.207565	2150.56	19.9481	2	0.591388	25.7584	0.348978	0.000367347	137.854	3.04462e+08	0.252746	20349	0.337042	0	10	3	21574.4	101.528	22.6205	223
19.6941	1014.41	-0.300852	564.667	20.22	2	0.325264	22.0995	0.267666	0.000367347	39.2943	2.78048e+08	0.182358	27877	0.408713	0	10	2	17785.8	101.592	22.6207	224
20.2768	999.811	-0.0106227	572.751	19.2254	2	0	25.8661	0.216571	0.000367347	68.0885	2.60602e+08	0.128545	29004	0.331992	0	10	2.5	15724.1	101.655	22.6208	225
21.2367	990.433	-0.506913	951.703	18.1163	2	0	32.5599	0.180053	0.000306631	73.5886	2.46214e+08	0.114305	28293	0.293775	0	15	3	13171.2	101.719	22.6209	226
20.5277	986.48	-0.212481	915.391	20.0669	2	0	29.8358	0.294215	0.000306631	37.7747	2.71607e+08	0.220431	22352	0.288933	0	15	3.5	12425.6	101.783	22.621	227
20.0229	988.623	-0.37997	4294.2	13.6198	2	0	43.4753	0.360053	0.000306631	81.1897	1.98955e+08	0.260168	34588	0.298771	648	13	4	14506.6	101.846	22.6211	228
20.3211	986.396	-0.109175	2297.9	14.6717	2	0	42.5111	0.351145	0.000306631	86.8645	2.08964e+08	0.240138	36083	0.298367	0	13	4	18535.9	101.91	22.6212	229
19.8801	990.214	0.120451	1753.51	15.8596	2	0	31.3486	0.366265	0.000329406	1.79673	2.48976e+08	0.23819	35794	0.211633	0	11	4	18890.8	101.973	22.6212	230
20.6323	999.514	0.412854	1272.71	21.6368	2	0	25.1353	0.161704	0.000329406	220.944	2.4562e+08	0.13145	20733	0.284279	0	11	4	17739.7	102.037	22.6212	231
22.9889	1038.41	0.115141	1336.1	19.8266	2	0	20.7234	0.0694737	0.000329406	0	1.81388e+08	0.0694737	31827	0.238708	0	9	3	18670.2	102.101	22.6212	232
22.5674	1028.24	0.110368	568.445	21.4871	2	0	20.9806	0.163344	0.000329406	0	1.29945e+08	0.12646	15114	0	0	7	3	17271.3	102.164	22.6211	233
22.8232	1039.74	0.258574	632.468	21.9142	2	0	21.6689	0.190252	0.000329406	0	8.1719e+07	0.184115	9654	0	0	6	0	11932.1	102.228	22.621	234
21.8484	1212.38	-0.573267	1303.9	18.2662	2	0.236555	44.8258	0.378014	0.000346601	13.1329	1.69859e+08	0.195104	3512	0.275308	0	11	2	614.765	99.3648	22.656	235
18.7737	1245.46	-0.576156	2678.54	20.6869	2	0	36.175	0.510065	0.000346601	266.09	3.94593e+08	0.324373	5558	0.247925	0	11	2	6881.92	99.4284	22.657	236
21.0038	1233.51	-0.581315	3068.98	18.5455	2	0	43.1573	0.34883	0.000274227	103.236	2.48937e+08	0.166192	9334	0.333575	0	18	2	13242.4	99.4919	22.658	237
20.3997	1239.05	-0.590574	1949.54	20.3854	2	0.443541	38.333	0.284903	0.000274227	43.3601	3.5459e+08	0.178402	6435	0.343004	0	18	2	19370.1	99.5555	22.659	238
20.9271	1255.81	-0.735818	13729.2	16.7518	2	0	45.1864	0.263837	0.000274227	127.303	2.88032e+08	0.134812	17168	0.319267	0	18	2	25526.1	99.6191	22.66	239
19.4049	1254.83	-0.705507	1973.86	19.8975	2	0	56.0711	0.552456	1.39037e-05	246.938	3.98615e+08	0.27801	17057	0.26265	0	18	2	30570.6	99.6827	22.6609	240
17.5647	1241.25	-0.800545	2657.97	18.6858	1	0	55.6952	0.723211	1.39037e-05	262.768	3.8565e+08	0.302349	34850	0.217821	0	16	2	33897.9	99.7463	22.6618	241
19.0072	1259.39	-0.545083	3294.68	17.1316	1	0	58.2409	0.588886	1.39037e-05	353.952	3.00112e+08	0.227956	50499	0.2554	0	16	2	38014.9	99.8099	22.6627	242
18.7498	1242.67	-0.526688	2285.68	16.1409	2	0	50.5075	0.612567	1.39037e-05	166.24	3.2581e+08	0.269829	36013	0.223179	0	14	2	42740.8	99.8735	22.6636	243
18.4329	1238.89	-0.232834	1696.71	20.5107	2	0.0887083	53.9213	0.614565	1.39037e-05	120.466	4.11295e+08	0.293405	20389	0.217458	0	14	2	47895.7	99.9371	22.6644	244
19.9421	1264.67	-0.327143	2230.51	20.0692	2	0	59.6622	0.496057	3.09833e-05	514.311	3.67279e+08	0.199703	26243	0.213183	0	13	3	53296.9	100.001	22.6652	245
19.9723	1252.76	0.0413034	2102.25	18.4768	2	0	72.9739	0.423667	3.09833e-05	417.913	3.15851e+08	0.174933	23316	0.233371	0	13	3	58900.6	100.064	22.666	246
20.2272	1244.85	-0.164919	2447.25	18.7815	1	0	60.0685	0.407301	3.09833e-05	517.128	3.32247e+08	0.163972	17630	0.266633	0	15	2	64680.7	100.128	22.6667	247
19.4867	1225.48	-0.204315	1571.57	20.087	1	0	52.7838	0.385628	3.09833e-05	601.285	3.00889e+08	0.153666	16422	0.216263	0	14.3333	2	70593.7	100.192	22.6675	248
21.7704	1249.02	-0.240821	1034.87	20.4737	1	0	49.1309	0.213047	2.04773e-05	281.807	1.8152e+08	0.08247	25518	0.185858	0	13	2	73861.9	100.255	22.6682	249
21.828	1234.18	-0.0830868	865.332	19.5251	2	0	46.8999	0.300462	2.04773e-05	166.198	2.10863e+08	0.120185	25340	0.208187	0	11	2	76745.2	100.319	22.6689	250
21.658	1224.03	-0.0633701	932.152	17.4543	2	0.413972	30.1273	0.368742	2.04773e-05	224.583	2.14743e+08	0.142739	23454	0.296125	0	9	2	80060.2	100.382	22.6695	251
21.2033	1206.73	-0.04752	639.398	20.702	2	0.946222	44.2673	0.382946	2.04773e-05	65.7752	2.74494e+08	0.18171	21800	0.36105	2310	10	2	83755.8	100.446	22.6701	252
20.1451	1193.84	0.0435486	358.104	15.5307	2	0.0591388	38.2565	0.37922	0.000389765	544.747	2.85507e+08	0.192352	37591	0.369242	0	11	2	87783.7	100.51	22.6707	253
20.5379	1189.31	-0.044858	371.006	13.4876	2	0	38.1693	0.33341	0.00030266	158.277	2.74155e+08	0.150572	49314	0.348575	0	11.5	2	92100.6	100.573	22.6713	254
20.6673	1182	-0.121369	1391.86	11.4043	2	0	45.1373	0.369535	0.00030266	285.536	2.49282e+08	0.15449	52983	0.322917	55860	13	1	96667.6	100.637	22.6719	255
19.6131	1152.16	-0.200194	1742.41	17.2934	2	0	51.4023	0.505809	0.000316741	453.865	3.19142e+08	0.22843	27075	0.308383	13335	12.3333	1.5	101451	100.701	22.6724	256
20.1141	1156.26	-0.270463	1161.24	14.2695	2	0	46.1788	0.431516	0.000316741	48.7518	2.82006e+08	0.26058	50631	0.378475	5775	11	2	95241.8	100.764	22.6729	257
20.2665	1144.43	-0.592956	692.745	15.2097	2	0	36.9246	0.395344	0.000513575	60.4463	2.79557e+08	0.257975	39256	0.3595	0	10.5	2	89035.2	100.828	22.6734	258
18.9415	1124.5	-0.664159	666.106	17.8614	2	0	29.686	0.419819	0.000513575	138.992	3.29134e+08	0.325021	39429	0.296175	0	10	2	82880	100.891	22.6738	259
20.4272	1124.65	-0.593104	2826.13	12.8205	1	0	29.2949	0.326838	0.000361726	2182.32	2.23881e+08	0.210863	37046	0.331396	35280	10	2	76755	100.955	22.6743	260
19.5925	1106.96	-0.376913	1103.51	16.2231	2	0	31.0726	0.482786	0.000361726	379.979	2.7203e+08	0.37377	35127	0.355258	0	10	3	70528.1	101.019	22.6747	261
18.7228	1089.7	-0.767779	1455.72	11.8212	1	0	36.2432	0.594644	0.000361726	2677.42	2.21009e+08	0.276222	47643	0.300667	0	10	3	64361.7	101.082	22.6751	262
18.5641	1077.36	-0.431834	931.796	16.9052	2	0	31.5109	0.545441	0.000361726	1547.46	2.59649e+08	0.320618	35095	0.280558	0	10	3	58260.6	101.146	22.6754	263
19.0503	1068.37	-0.353629	938.119	14.5141	2	0	35.0406	0.47432	0.000361726	1427.97	2.31786e+08	0.292625	35350	0.24905	0	12	3	52266	101.21	22.6757	264
19.8395	1057.41	-0.245882	998.42	16.1905	2	0	27.8027	0.365265	0.000361726	1844.73	2.32578e+08	0.222965	29635	0.321433	0	13	3	46419.2	101.273	22.676	265
20.5124	1046.14	-0.488073	1014.63	17.536	2	0	31.0934	0.248663	0.000367347	252.307	2.57513e+08	0.112853	26069	0.379783	29472	11	3	40784	101.337	22.6763	266
20.9042	1033.66	-0.400789	2029.42	18.5484	2	0.473111	22.1101	0.240185	0.000367347	177.739	2.63333e+08	0.118007	20186	0.391929	612	11.5	3	35461.1	101.401	22.6766	267
18.1002	1028.13	-0.197482	1282.35	21.1169	2	0.680097	23.7357	0.428182	0.000367347	57.3407	3.58627e+08	0.230863	17039	0.311183	0	11.5	3	30614	101.464	22.6768	268
18.7913	1023.01	-0.327397	1263.99	21.7621	2	0.680097	24.3536	0.360733	0.000367347	42.0193	3.41457e+08	0.226913	18815	0.266683	0	11.5	3	26505.2	101.528	22.677	269
20.4918	1009.13	-0.271654	618.232	21.6873	2	0	31.0032	0.223258	0.000321763	257.555	2.75567e+08	0.129634	26836	0.285092	0	10	2	23497	101.592	22.6772	270
21.7982	1000.67	-0.203849	857.6	17.1209	2	0	35.6629	0.159603	0.000321763	630.013	2.0203e+08	0.094879	26114	0.3136	414	10	2.66667	21663.7	101.655	22.6773	271
20.8218	986.482	-0.163749	442.884	21.8341	2	0	26.4452	0.245863	0.000295065	40.5379	2.46979e+08	0.190345	23268	0.366654	0	13	3	19167.9	101.719	22.6774	272
19.9574	987.239	-0.0818467	1620.49	18.1686	2	0	46.6012	0.400506	0.000295065	155.034	2.24588e+08	0.210404	29092	0.272325	0	13	3.25	18667.6	101.782	22.6775	273
19.5893	988.205	-0.243336	2107.76	15.8669	2	0	39.7998	0.438133	0.000295065	129.778	2.2306e+08	0.293538	30110	0.246588	0	13.5	3.5	20112.8	101.846	22.6776	274
19.1806	991.606	-0.105266	1773.36	16.4653	2	0	25.4095	0.43885	0.000295065	17.1815	2.97981e+08	0.334901	29592	0.229142	0	13.5	3.5	23330.8	101.91	22.6777	275
20.156	990.464	-0.0695864	1459.72	23.7415	2	0	22.4319	0.356795	0.000295065	5.43864	3.07051e+08	0.276228	26949	0.269308	0	10.5	3	24911.4	101.973	22.6777	276
22.5896	1026.11	0.178346	2358.19	21.7682	2	0	21.393	0.144081	0.000329406	0	2.02568e+08	0.139433	30874	0.25155	0	10.5	3	23995.4	102.037	22.6777	277
21.1563	1225.1	-0.350312	2962.59	16.6358	2	0	49.0828	0.354934	0.000266297	123.124	2.2152e+08	0.142301	6964	0.296375	0	7	1.5	2518.7	99.3637	22.7124	278
18.8433	1258.27	-0.415927	5832.35	17.7554	2	0	41.7373	0.58349	0.000299001	188.374	3.99421e+08	0.262006	8227	0.2488	0	7	2	7175.09	99.4273	22.7135	279
20.0747	1252.62	-0.507459	5777.41	18.2327	2	0	53.2222	0.390544	0.000274227	92.2567	2.49887e+08	0.201571	12447	0.352733	0	17	2	12230.2	99.4909	22.7145	280
20.976	1247.45	-0.460919	1833.35	20.6052	2	0	46.3748	0.322584	0.000274227	63.6419	3.01856e+08	0.17482	8172	0.305733	0	17	2	17465.7	99.5545	22.7155	281
21.427	1259.94	-0.567308	1892.39	17.5296	2	0	46.3172	0.234372	1.39037e-05	181.543	2.59173e+08	0.132199	19527	0.294392	0	17.5	2	21659.1	99.6181	22.7164	282
18.4239	1257.3	-0.665417	2341.44	18.5424	2	0	53.9247	0.639166	1.39037e-05	215.517	4.57541e+08	0.257316	23536	0.2397	0	18	2	25091.2	99.6817	22.7174	283
17.032	1243.43	-0.741478	4030.33	18.1734	2	0	54.8029	0.749608	1.39037e-05	112.658	2.85019e+08	0.290171	29774	0.162354	0	14	2	28983.8	99.7454	22.7183	284
18.5456	1259.79	-0.514943	6811.01	13.9232	1	0	57.6353	0.625278	1.39037e-05	264.482	2.95219e+08	0.242043	46768	0.214683	0	14	2	33706.6	99.809	22.7192	285
18.0556	1245.03	-0.451699	2184.87	18.9041	2	0	52.9037	0.630789	3.09833e-05	394.935	4.08606e+08	0.30929	25154	0.194683	0	9	2.25	38951.5	99.8726	22.72	286
19.7193	1268.65	-0.478785	2441	18.9578	2	0	63.7502	0.531281	3.09833e-05	519.442	3.73495e+08	0.226223	26529	0.193833	0	9	2.25	44442.1	99.9362	22.7209	287
19.6269	1251.41	-0.409799	4154.69	14.6568	2	0	73.3136	0.516695	3.09833e-05	401.572	2.66766e+08	0.207419	31656	0.242767	0	11	2.5	50182.2	99.9999	22.7217	288
19.3018	1242.25	-0.205152	2483.26	12.5986	2	0	60.7529	0.531219	3.09833e-05	318.391	2.20802e+08	0.205633	24237	0.273108	0	11	2	56098	100.064	22.7224	289
17.1554	1194.06	-0.141002	1994.03	16.3554	2	0.266125	49.9583	0.65587	3.09833e-05	231.724	3.56621e+08	0.253885	19421	0.289	0	13	1.5	62139.2	100.127	22.7232	290
18.8919	1225.14	-0.161053	2545.13	18.3207	1	0	56.174	0.480496	4.90389e-05	965.145	3.49595e+08	0.198398	32243	0.269333	0	12.6667	1.25	68272.7	100.191	22.7239	291
19.7482	1238.47	-0.216229	1905.22	19.7926	2	0	61.7175	0.434191	4.90389e-05	359.171	3.19374e+08	0.180079	26464	0.241758	0	12	1.5	74475.6	100.254	22.7246	292
20.5755	1238.33	-0.0171887	1622.78	18.5602	2	0	61.8322	0.33649	4.90389e-05	447.132	3.06047e+08	0.130254	34973	0.239817	0	13	2	80731.9	100.318	22.7253	293
21.2341	1229.01	0.0390078	655.779	21.6741	2	0.709666	43.827	0.32257	4.90389e-05	140.173	2.16167e+08	0.13985	26557	0.337842	0	14	1.5	85403.1	100.382	22.726	294
19.9646	1201.18	-0.0230484	268.8	18.3738	2	0.413972	41.585	0.453818	0.000389765	230.673	2.91102e+08	0.24594	27039	0.351192	4725	14.5	1.75	88876.7	100.445	22.7266	295
19.4288	1187.68	0.0471178	294.662	16.9664	2	0	40.0546	0.428379	0.000389765	350.84	3.2937e+08	0.287004	34043	0.369725	0	11	2	92682.4	100.509	22.7272	296
20.3273	1193.06	-0.0357977	305.641	15.5749	2	0	40.5891	0.391164	0.00030266	84.8865	2.47869e+08	0.20486	49953	0.363633	33495	10.5	1.5	96781	100.573	22.7278	297
20.1491	1169.49	-0.307327	522.094	15.7232	2	0	47.1201	0.533061	0.00030266	50.5637	2.38508e+08	0.272377	30699	0.356771	0	13	1.5	101137	100.636	22.7284	298
19.0867	1152.32	-0.396666	512.664	15.5643	2	0	48.2476	0.503887	0.000316741	57.0454	2.35939e+08	0.227562	40330	0.29335	0	13	2	103456	100.7	22.7289	299
21.1291	1159.01	-0.38088	451.823	13.7207	2	0	49.5357	0.357744	0.000316741	126.159	2.64922e+08	0.193874	56105	0.33695	0	13	2	97333.7	100.764	22.7294	300
20.0996	1144.85	-0.548732	1503.18	16.6159	2	0	41.7527	0.380293	0.000513575	43.4849	2.73797e+08	0.235537	45321	0.367712	50400	12	1.75	91122.4	100.827	22.7299	301
19.4003	1130.09	-0.764735	3455.07	13.3523	2	0	46.0497	0.420881	0.000513575	1122.53	2.454e+08	0.238952	43970	0.405383	0	11	2.5	84941.3	100.891	22.7303	302
19.8398	1127.87	-0.819574	30871.2	10.1483	2	0	36.2295	0.419816	0.000513575	1503.87	1.92171e+08	0.211262	41270	0.411937	508725	10.5	3	78808.4	100.955	22.7308	303
18.7833	1098.97	-0.588746	6978.05	11.2881	2	0	42.9912	0.552347	0.000361726	820.402	2.5914e+08	0.273679	43246	0.413975	412125	10	3	72742.6	101.018	22.7312	304
18.578	1087.35	-0.687496	2864.29	12.306	1	0	38.8785	0.576279	0.000361726	2257.86	2.76193e+08	0.260255	46207	0.311838	270375	9.5	3	66766.6	101.082	22.7315	305
19.3731	1082.08	-0.429064	979.484	17.6676	2	0	33.6511	0.433973	0.000361726	1823.29	2.69083e+08	0.241905	32115	0.314667	0	9	2.25	60906.8	101.146	22.7319	306
18.9519	1064.82	-0.682857	690.677	17.2346	2	0	23.8713	0.435229	0.000361726	583.162	3.02202e+08	0.296109	38107	0.305717	0	11	2.5	55200.3	101.209	22.7322	307
20.4036	1057.24	-0.578471	911.858	15.9023	2	0	32.847	0.317478	0.000367347	247.79	2.84126e+08	0.127446	37239	0.299967	18690	12	2.75	49700	101.273	22.7325	308
21.1458	1043.64	-0.656739	2222.48	14.6537	2	0.325264	29.7353	0.232328	0.000367347	216.443	2.27146e+08	0.0839379	27740	0.367825	2952	12	3	44482.3	101.337	22.7328	309
18.3188	1026.29	-0.41644	993.513	23.3073	2	0.946222	25.4102	0.348328	0.000367347	25.9929	3.5719e+08	0.215739	16103	0.359537	0	12	2.75	39658.9	101.4	22.7331	310
19.1346	1023.04	-0.40266	1044.04	17.978	2	0.0591388	32.4658	0.450099	0.000367347	158.759	2.74822e+08	0.249732	28743	0.2744	0	13	2	35391.5	101.464	22.7333	311
19.5415	1012.17	-0.184376	638.998	21.6442	2	0.0887083	29.5379	0.390125	0.000321763	352.791	2.83587e+08	0.247666	21454	0.283975	0	13	2.25	31904	101.528	22.7335	312
20.357	1004.87	-0.215876	568.172	23.5344	2	0	32.5763	0.306389	0.000321763	115.787	2.63461e+08	0.216873	21042	0.326325	0	10	2	29401	101.591	22.7337	313
20.8097	996.738	-0.188137	455.457	24.68	2	0	32.2003	0.261737	0.000321763	321.823	2.40607e+08	0.206688	14862	0.397933	0	10	2.66667	27230.8	101.655	22.7338	314
19.1932	994.071	-0.172976	469.834	22.1502	2	0	36.3069	0.381683	0.000321763	236.722	2.63063e+08	0.241322	20008	0.394692	0	11	3	25290.4	101.719	22.7339	315
19.1308	991.64	-0.362597	833.148	23.8126	2	0	32.4721	0.446034	0.000295065	20.6307	2.83984e+08	0.290066	18475	0.314567	0	11	3	24916.6	101.782	22.734	316
20.4598	985.092	-0.185275	1105.62	21.8427	2	0	33.6385	0.405437	0.000295065	74.1903	2.59066e+08	0.313887	15653	0.288008	0	14	3	26016.9	101.846	22.7341	317
19.4358	982.617	-0.197914	1363.69	23.5495	2	0	24.1066	0.406114	0.000371986	57.0912	3.55954e+08	0.289258	14021	0.246825	0	14	3	28609.4	101.91	22.7341	318
20.0526	990.717	-0.0310798	874.362	24.9069	2	0	22.397	0.353443	0.000371986	3.11428	3.14306e+08	0.277434	15821	0.308358	0	8	3	30984.3	101.973	22.7342	319
22.1987	994.852	0.106952	968.324	25.6862	2	0	23.5585	0.252846	0.000371986	0.00590945	1.39094e+08	0.236054	10113	0.304225	0	8	4	30251.1	102.037	22.7342	320
18.0128	1270.85	-0.357247	2678.99	16.2959	2	0.325264	44.129	0.617211	0.000299001	94.9797	4.36931e+08	0.334489	9911	0.2488	0	7	2	4025.62	99.4262	22.7699	321
19.7194	1267.06	-0.517494	3102.95	18.8842	1	0	56.0464	0.413831	0.000299001	249.476	2.72799e+08	0.192231	12157	0.352733	0	17	2	8971.75	99.4899	22.7709	322
19.3024	1268.58	-0.432582	1645.05	19.3778	2	0	38.0808	0.465888	0.000299001	140.436	3.64735e+08	0.252481	11114	0.305733	0	17	2	12608.9	99.5535	22.7719	323
21.2075	1278.26	-0.614976	2360.05	17.9214	2	0	53.1613	0.245075	1.39037e-05	205.269	2.78264e+08	0.12547	14792	0.264833	0	17.5	2	16452.9	99.6172	22.7729	324
17.5908	1257.17	-0.664362	2558.11	17.2439	2	0	39.4685	0.569441	1.39037e-05	40.9436	5.15051e+08	0.236174	23221	0.261933	0	18	2	19970.9	99.6808	22.7738	325
16.44	1244.79	-0.650494	4059.61	16.0518	2	0	59.3076	0.800992	1.39037e-05	140.412	4.90796e+08	0.310061	29734	0.181321	0	14	2	24684.6	99.7444	22.7747	326
18.5554	1266.58	-0.43745	3383.81	17.6924	2	0	53.7417	0.617257	3.09833e-05	467.297	3.68613e+08	0.296283	35676	0.202162	0	14	2	30024.6	99.8081	22.7756	327
19.8712	1279.42	-0.320863	2190.82	18.6097	2	0	64.4266	0.469712	3.09833e-05	307.655	3.78363e+08	0.193946	20837	0.20031	0	9	2	35685.9	99.8717	22.7765	328
18.6047	1240.99	-0.187766	2389.8	14.8531	2	0	68.7004	0.600776	3.09833e-05	136.19	3.01028e+08	0.232558	17907	0.211425	0	9	2	41606.1	99.9354	22.7773	329
18.3542	1240.86	-0.227476	2037.22	11.9367	2	0	74.9558	0.533914	3.09833e-05	204.202	2.25727e+08	0.212939	38099	0.237996	0	11	2	47688.8	99.9991	22.7781	330
18.6496	1236.31	-0.129876	1918.33	14.7305	2	0	63.7305	0.559749	3.09833e-05	48.2132	2.07475e+08	0.216677	24596	0.2638	0	11	1.5	53879.1	100.063	22.7789	331
16.504	1195.21	-0.0845316	2586.05	14.4516	2	0	52.8957	0.680198	3.09833e-05	179.635	3.16341e+08	0.263302	23881	0.284629	0	13	1	60143.6	100.126	22.7797	332
19.138	1238.31	-0.00872082	4659.48	13.0335	1	0	59.9771	0.540905	4.90389e-05	913.242	2.64719e+08	0.217758	44436	0.267873	0	12.6667	1	66461.5	100.19	22.7804	333
18.6346	1223.67	-0.300623	2044.23	20.0625	2	0	57.3083	0.538579	4.90389e-05	311.726	3.46572e+08	0.233753	24698	0.220179	0	12	1	72818.8	100.254	22.7811	334
21.0899	1249.5	0.05059	2077.46	17.8298	2	0	38.7912	0.311471	4.90389e-05	831.681	3.19145e+08	0.120569	48820	0.247369	0	13	2.5	79204.8	100.317	22.7818	335
21.6221	1230.73	-0.0552661	806.433	21.4334	2	0.177417	39.3734	0.38967	4.90389e-05	468.361	2.18655e+08	0.165924	35158	0.336533	9870	14	2	85601	100.381	22.7825	336
19.7948	1204.23	0.00514514	218.763	19.8417	2	0	32.0909	0.448568	0.000389765	107.007	3.20239e+08	0.236149	34227	0.363025	19005	14.5	2	92015.9	100.445	22.7831	337
20.8436	1210.51	-0.0021655	332.641	19.5603	2	0	40.0322	0.371128	0.000389765	80.007	3.20416e+08	0.198155	41753	0.367731	0	11	2	97736.2	100.508	22.7837	338
20.5525	1189.09	-0.164217	306.281	20.7565	2	0	47.4142	0.453465	0.00030266	38.5247	2.79536e+08	0.250764	27126	0.369525	0	10.5	1.5	101631	100.572	22.7843	339
18.5092	1151.75	-0.176295	448.253	18.6328	2	0	56.5878	0.535879	0.000316741	142.534	2.54039e+08	0.240895	21147	0.263575	51555	13	2	105787	100.636	22.7848	340
20.6807	1172.95	-0.424601	502.512	15.6649	2	0	58.7917	0.393311	0.000316741	313.085	2.09417e+08	0.174805	39913	0.293692	525	13	2	105526	100.699	22.7854	341
20.4354	1157.99	-0.455521	379.698	15.2607	2	0	40.5743	0.312486	0.000513575	306.785	2.7685e+08	0.172804	42903	0.274708	17010	13	2	99376.4	100.763	22.7859	342
19.3582	1137.32	-0.449554	1369.81	15.728	2	0	50.9292	0.412717	0.000513575	19.8073	2.68174e+08	0.260352	42151	0.227183	0	12	2	93272	100.827	22.7864	343
19.7675	1139.18	-0.474652	15972.5	10.5438	2	0	48.1915	0.444154	0.000513575	1068.68	1.73916e+08	0.235609	49896	0.226425	670215	11	3	87230.9	100.891	22.7868	344
19.8722	1137.26	-0.587311	95043.1	6.34095	5	0	32.3264	0.438093	0.000513575	1109.66	1.0612e+08	0.104743	55540	0.264992	2185470	10.5	3	81267.3	100.954	22.7872	345
19.0296	1103.76	-0.457721	21104.4	12.442	2	0	41.3359	0.536173	0.000361726	826.339	2.32114e+08	0.159654	41007	0.295708	661185	10	3	75399.6	101.018	22.7876	346
18.4406	1082	-0.502124	1558.32	16.628	2	0	35.8778	0.545326	0.000361726	1603.45	3.15482e+08	0.291164	43943	0.276317	0	9.5	3	69651.9	101.082	22.788	347
19.2403	1079.71	-0.494187	776.194	20.0666	2	0	25.6756	0.419079	0.000361726	1222.48	3.44657e+08	0.266048	26315	0.354225	0	9	3	64056.6	101.145	22.7884	348
19.9345	1067.46	-0.413635	489.404	21.301	2	0	26.4652	0.386459	0.000367347	39.8279	2.98235e+08	0.284234	30511	0.3416	0	10.9333	3	58657.4	101.209	22.7887	349
20.6852	1054.5	-0.042422	2213.96	15.7986	2	0	31.2402	0.270691	0.000367347	300.786	2.53798e+08	0.112268	33489	0.295513	2295	12	3	53513.6	101.273	22.789	350
19.3777	1034.02	-0.521139	1595.02	22.3135	2	0.413972	24.2653	0.302909	0.000367347	107.287	3.38844e+08	0.188319	14014	0.325642	1368	12	3	48706.1	101.336	22.7893	351
18.5477	1027.22	-0.419812	752.403	22.093	2	0.236555	29.4728	0.37684	0.000367347	117.349	3.04531e+08	0.256738	21994	0.310442	0	12	2	44344.6	101.4	22.7895	352
20.2542	1021.66	-0.170018	1149.1	20.4118	2	0	39.517	0.380169	0.000318391	175.877	2.50375e+08	0.250176	24767	0.297942	0	13	2	40573.1	101.464	22.7898	353
20.8534	1011.5	0.067217	933.126	22.8613	2	0	36.5419	0.383362	0.000318391	109.994	2.77629e+08	0.261181	23580	0.337442	0	13	2.5	37567.8	101.527	22.79	354
21.6659	1008.5	-0.13704	798.061	25.8008	2	0	38.6393	0.344754	0.000321763	337.066	2.41466e+08	0.266906	16144	0.330158	0	10	3	35426	101.591	22.7901	355
20.2915	993.155	0.0399671	627.756	23.4884	2	0	38.4494	0.372937	0.000321763	711.534	2.33151e+08	0.216544	14080	0.32255	0	10	3	33045.2	101.655	22.7903	356
18.749	991.471	0.0437795	396.467	24.0391	2	0	37.7527	0.423989	0.000321763	145.91	2.67585e+08	0.270012	23642	0.352133	0	11	3	31465.5	101.719	22.7904	357
20.2542	988.987	0.283944	731.778	25.5168	2	0	35.8842	0.386337	0.000295065	65.8579	2.53789e+08	0.287136	20967	0.374533	0	11	2.5	31168.3	101.782	22.7905	358
21.9922	998.008	0.0456748	1637.92	23.9434	2	0	42.2554	0.327729	0.000371986	117.817	1.86558e+08	0.27638	15743	0.374533	0	14	4	32054.8	101.846	22.7906	359
21.6202	987.637	0.0874965	1268.23	25.7818	2	0	32.365	0.273218	0.000371986	83.8611	2.23263e+08	0.211524	9904	0.277375	0	14	4	34192.5	101.91	22.7906	360
21.7306	992.915	0.130675	718.084	25.9768	2	0	26.2539	0.296188	0.000371986	16.1978	1.49414e+08	0.249539	12548	0	0	8	0	37116.7	101.973	22.7907	361
17.0921	1285.93	-0.576541	2036.43	13.8433	2	0.0295694	50.5883	0.522955	0.000299001	134.167	2.29672e+08	0.29445	10976	0.257904	0	0	0	638.62	99.4252	22.8263	362
19.6149	1278.33	-0.427776	3343.28	19.0888	2	0	40.6142	0.492185	0.000299001	212.395	3.48205e+08	0.218749	13493	0.211771	0	16.5	2	3563.12	99.4888	22.8274	363
17.9937	1286.43	-0.342137	1998.61	19.1828	2	0	38.323	0.534513	0.000299001	88.8675	4.65466e+08	0.280804	16325	0.275448	0	16.5	2	8264.38	99.5525	22.8283	364
20.3576	1287.08	-0.50295	1587.84	22.1089	2	0	34.3896	0.335279	1.39037e-05	49.9908	4.0327e+08	0.192275	12921	0.329317	0	17.75	2	11020.6	99.6162	22.8293	365
17.6907	1268.1	-0.393793	1609.55	19.1874	2	0	44.9669	0.648836	1.39037e-05	110.518	4.81984e+08	0.33777	17385	0.279992	0	18	2	15696.4	99.6798	22.8303	366
17.8056	1262.37	-0.423255	2372.92	19.2401	1	0	52.4186	0.700929	1.39037e-05	276.269	4.22319e+08	0.288832	28696	0.200042	0	15	2	21196.3	99.7435	22.8312	367
19.8306	1283.87	-0.0695005	3445.11	20.143	2	0	64.1534	0.485838	3.09833e-05	339.472	4.36433e+08	0.209766	34883	0.165958	0	15	2	27124.1	99.8072	22.8321	368
18.3034	1249.66	-0.0658506	1671.55	17.2872	2	0	55.3416	0.672745	3.09833e-05	246.448	4.78094e+08	0.287357	15212	0.188554	0	9	1.5	33282.5	99.8709	22.8329	369
16.1194	1219.13	-0.026778	1357.01	14.7713	2	0	45.2315	0.782714	3.09833e-05	11.154	3.97848e+08	0.351464	19950	0.25215	0	9	1	39564	99.9345	22.8338	370
17.4435	1232.04	-0.205102	1920.18	16.1054	2	0	63.4507	0.662424	3.09833e-05	89.1205	3.02722e+08	0.279733	16760	0.260742	0	9	2	45918	99.9982	22.8346	371
19.0283	1259.44	0.24867	1915.64	15.5924	2	0	67.1553	0.518224	2.20004e-05	179.609	1.89544e+08	0.200603	24001	0.260796	0	9	1.5	52308.5	100.062	22.8354	372
18.3089	1235.31	0.0115155	2317.1	14.2337	2	0	59.4368	0.511687	4.90389e-05	598.383	2.43401e+08	0.21788	23293	0.277175	0	11	2	58717.2	100.126	22.8361	373
18.8044	1230.48	-0.107131	2573.63	16.9179	2	0	50.3723	0.571947	4.90389e-05	438.879	3.17625e+08	0.221399	28462	0.249642	0	11.3333	1	65152.3	100.189	22.8369	374
20.0087	1247.98	-0.297035	2070.39	17.0747	2	0	45.6948	0.428886	4.90389e-05	406.484	3.41736e+08	0.177088	33112	0.215858	0	12	1	71606.7	100.253	22.8376	375
22.2398	1254.56	-0.236748	2080.36	16.9184	4	0	32.9445	0.141301	0.000312392	1067.78	2.05309e+08	0.0546973	50156	0.314213	0	13	2.5	78075.4	100.317	22.8383	376
21.5827	1232.89	-0.0860831	366.917	19.771	2	0	42.1769	0.313485	0.000312392	108.208	2.1037e+08	0.125141	40421	0.372442	6510	14	2	84555.3	100.38	22.8389	377
21.3893	1219.77	-0.212734	483.964	20.7806	2	0	46.9037	0.293178	0.000312392	69.6707	2.33339e+08	0.118028	40840	0.314342	0	14.5	2	91044	100.444	22.8396	378
21.3764	1209.17	-0.127412	583.724	21.033	2	0	39.0142	0.284924	0.000312392	42.7136	2.49641e+08	0.117646	45140	0.327033	0	12	2	97539.7	100.508	22.8402	379
20.7536	1187.24	-0.0530771	497.953	22.5928	2	0	55.2158	0.484533	0.000312392	231.033	2.25615e+08	0.225073	31725	0.296758	19845	11	2	104041	100.572	22.8407	380
20.0352	1173.24	-0.122458	495.307	19.3546	2	0	50.917	0.473344	0.00030266	216.371	2.40313e+08	0.205439	41362	0.251879	5985	13	2	110547	100.635	22.8413	381
20.2508	1167.69	-0.278621	423.998	16.3387	2	0	45.8897	0.380562	0.000373426	45.0674	3.17244e+08	0.21571	52293	0.300017	18165	13	2	107746	100.699	22.8418	382
21.3409	1166.62	-0.528168	847.326	13.3572	2	0	38.038	0.206798	0.000373426	236.123	2.4434e+08	0.101398	48387	0.290425	12075	13	2	101723	100.763	22.8424	383
20.6232	1146.88	-0.588214	580.247	15.5169	2	0	50.3204	0.329714	0.000513575	232.678	2.92214e+08	0.173579	46755	0.235188	0	14	2	95768.2	100.826	22.8428	384
19.8997	1132.68	-0.509589	1063.99	12.5203	2	0	35.547	0.429113	0.000513575	889.164	2.88383e+08	0.221478	37260	0.274742	0	15	2	89895.1	100.89	22.8433	385
19.3352	1122.64	-0.49013	22664.7	11.2723	2	0	33.7362	0.470764	0.000513575	658.421	3.25709e+08	0.19681	37240	0.258496	762090	14.5	2	84120.5	100.954	22.8437	386
18.2583	1090.31	-0.351381	4649.53	16.0448	2	0	34.6747	0.599417	0.000637069	1084.81	2.95799e+08	0.232033	33103	0.2479	57330	14	3	78466.4	101.018	22.8441	387
18.031	1077.86	-0.50041	1126.06	16.7545	2	0	41.1177	0.622096	0.000306134	163.278	3.13693e+08	0.308238	34452	0.344267	0	13.5	3	72960.8	101.081	22.8445	388
19.0367	1078.99	-0.794203	599.751	20.6886	2	0	30.1178	0.518902	0.000306134	68.1021	3.14635e+08	0.334776	24593	0.427883	0	13	2.75	67639.8	101.145	22.8449	389
19.9518	1065.45	-0.709399	1022.97	20.1682	2	0	32.7295	0.46085	0.000367347	249.582	2.61098e+08	0.271158	34926	0.389658	0	12	2	62550.6	101.209	22.8452	390
19.0088	1044.23	-0.661248	1295.8	21.1538	2	0.620958	25.8028	0.484422	0.000367347	120.703	3.20869e+08	0.318781	22122	0.355646	0	11	3	57754.5	101.272	22.8455	391
18.0273	1033.18	-0.665122	980.848	21.8645	2	0.561819	28.4439	0.424953	0.000367347	12.3676	3.6829e+08	0.246747	18379	0.304375	0	13	3	53330.8	101.336	22.8458	392
19.6892	1031.87	-0.618809	955.731	21.1651	2	0	28.5302	0.344341	0.000318391	95.7959	2.96604e+08	0.217712	26259	0.29605	0	13	2.75	49379.4	101.4	22.846	393
20.0916	1020.53	-0.110302	845.837	22.4246	2	0	42.8094	0.392606	0.000318391	87.5098	2.80522e+08	0.270181	19823	0.326508	0	14.5	2	46022.4	101.464	22.8463	394
21.3026	1019.88	-0.106747	1099.49	21.3749	1	0	42.3335	0.31154	0.000301087	339.514	2.162e+08	0.209927	21786	0.313375	0	14	2.75	43361.8	101.527	22.8465	395
21.9769	1017.98	-0.411061	831.225	24.3606	2	0.0295694	37.7761	0.297862	0.000321763	719.417	2.14589e+08	0.25531	15202	0.278308	0	11.5	3	41330.5	101.591	22.8466	396
21.1266	1003.81	-0.288544	509.789	25.883	2	0.0295694	32.9953	0.332901	0.000321763	477.064	2.44158e+08	0.272049	13314	0.30275	0	12	3	38996.5	101.655	22.8468	397
18.8282	985.969	-0.230767	610.617	27.5085	2	0	38.0398	0.354764	0.000321763	139.516	3.07498e+08	0.224719	15338	0.350475	0	9	3	37667.2	101.718	22.8469	398
20.7248	995.569	0.0496341	1150.75	25.3029	2	0	46.3168	0.333369	0.000371986	100.88	2.13144e+08	0.218386	17631	0.339342	0	8	3.5	37421.4	101.782	22.847	399
18.2746	1288.68	-0.496518	3316.61	17.9761	2	0	37.1142	0.545891	0.000207216	60.5676	4.2945e+08	0.28175	8819	0.236667	0	17	1.5	2993.05	99.4878	22.8838	400
17.1388	1292.76	-0.43753	1571.81	18.8101	2	0	27.7342	0.545028	0.00116477	2348.18	4.13967e+08	0.346608	14959	0	0	17	2	2336.21	99.5515	22.8848	401
19.2754	1295.75	-0.268591	1593.83	23.0389	2	0	31.5267	0.422259	0.00116477	3777	4.25024e+08	0.241913	12889	0.371817	0	18	2	6756.23	99.6152	22.8858	402
16.5499	1267.26	-0.308762	1495.5	20.0816	2	0	31.2023	0.622727	4.92917e-05	429.562	5.3149e+08	0.305337	15658	0.287242	0	18	2	12686	99.6789	22.8867	403
18.9728	1289.17	-0.397101	2384.26	20.0086	1	0	41.1607	0.581275	1.39037e-05	459.202	4.16258e+08	0.22501	36949	0.19265	0	16	2	19020.1	99.7426	22.8876	404
18.6463	1270.38	0.162658	2174.94	21.1219	2	0	41.7303	0.684608	1.39037e-05	272.328	5.63115e+08	0.298136	18555	0.189392	0	15	2	25418.6	99.8063	22.8885	405
16.7891	1240.36	0.159877	1473.34	21.7364	2	0	54.5286	0.834357	3.80584e-05	234.904	7.10135e+08	0.322977	13471	0.318204	0	9	2	31864.5	99.87	22.8894	406
16.442	1227.12	0.200381	1089.16	14.0424	2	0	49.241	0.881653	3.09833e-05	58.7258	3.33791e+08	0.329909	26230	0.3708	0	9	2	38342.8	99.9337	22.8902	407
16.619	1222.38	-0.205689	1332.46	15.5011	2	0	62.3832	0.780278	3.09833e-05	123.391	3.92844e+08	0.326207	25728	0.296367	0	9	2	44839.3	99.9974	22.891	408
18.0218	1239.56	-0.0671907	2561.39	16.8765	2	0	58.9021	0.627771	2.20004e-05	297.105	2.854e+08	0.26579	24041	0.269604	0	9	2	51347.1	100.061	22.8918	409
20.5477	1274.61	0.0524469	3314.96	13.9962	2	0	41.0024	0.353266	2.20004e-05	215.725	2.81166e+08	0.136748	32917	0.217767	0	11	1	57862.5	100.125	22.8926	410
19.4041	1236.65	0.147607	6206.95	16.3886	2	0	45.417	0.496737	4.90389e-05	642.959	3.46783e+08	0.192285	18362	0.226762	0	11	1	64383.1	100.189	22.8933	411
19.5983	1235.56	-0.0467879	2645.22	19.8656	2	0	38.2168	0.401528	4.90389e-05	491.664	4.09503e+08	0.143917	24075	0.22185	0	12	1.5	70907.4	100.252	22.894	412
22.0165	1250.14	-0.0990821	2971.6	16.9728	4	0	36.9027	0.148973	0.000312392	678.736	1.80621e+08	0.0619387	43866	0.30135	0	13	2	77434.7	100.316	22.8947	413
20.69	1224.52	-0.119875	1048.94	17.7552	2	0	43.5462	0.370017	0.000312392	1075.81	2.7056e+08	0.116376	38709	0.3401	0	14	2	83964	100.38	22.8954	414
20.7437	1213.98	-0.144351	758.525	16.404	2	0	48.8949	0.314861	0.000312392	89.7303	2.75051e+08	0.117194	43112	0.317958	0	14.5	2	90495.1	100.443	22.896	415
20.4718	1202.17	-0.331306	604.684	17.123	2	0	55.7734	0.343548	0.000312392	116.94	2.61298e+08	0.115255	48812	0.3049	0	12	2	97027.6	100.507	22.8966	416
20.0634	1185.12	-0.318333	1442.49	20.801	2	0	50.6634	0.488697	0.000312392	567.933	2.56027e+08	0.219441	30672	0.276433	0	11	1.75	103561	100.571	22.8972	417
20.8055	1182.49	-0.423247	748.61	19.901	2	0	54.4318	0.562071	0.000312392	379.677	2.11372e+08	0.232081	36181	0.259046	3780	13	1.5	110096	100.635	22.8978	418
20.7332	1170.79	-0.375198	693.789	18.0108	2	0	56.8994	0.423045	0.000373426	147.941	2.50262e+08	0.169825	53119	0.261225	0	13	1.75	110269	100.698	22.8983	419
21.676	1165.65	-0.220318	556.773	14.8542	2	0	39.7081	0.184494	0.000373426	228.649	2.44691e+08	0.0887304	56292	0.2863	0	13	2	104392	100.762	22.8988	420
21.0968	1147.33	-0.406253	597.753	15.2187	2	0	41.4235	0.275674	0.000373426	108.422	2.7433e+08	0.119518	50484	0.245842	24570	14	2	98598.7	100.826	22.8993	421
19.418	1124.28	-0.54577	653.508	18.8915	2	0	39.2333	0.414505	0.000513575	308.72	3.55388e+08	0.165802	36475	0.258392	0	15	2	92904.7	100.89	22.8998	422
18.9613	1106.62	-0.659168	755.571	16.8614	2	0	29.6439	0.548047	0.000306134	40.8195	3.5492e+08	0.18669	26728	0.287187	37905	14.5	2.75	87329.4	100.953	22.9002	423
18.2781	1090.43	-0.59664	1226.79	17.8188	2	0	29.9255	0.589482	0.000306134	66.0267	3.5432e+08	0.242908	33457	0.30915	0	14	2	81897.1	101.017	22.9006	424
18.2329	1077.34	-0.694901	1443.01	16.8429	2	0	34.1268	0.603312	0.000306134	175.772	3.23236e+08	0.249647	24116	0.355921	0	13.5	2	76638.3	101.081	22.901	425
17.508	1052.23	-0.786002	895.869	19.2886	2	0	31.1891	0.633261	0.000306134	67.7996	3.22506e+08	0.277818	20887	0.381542	0	13	3	71591.2	101.145	22.9013	426
18.6269	1056.26	-0.793994	612.925	19.9748	2	0	31.4934	0.489133	0.000306134	110.549	3.05816e+08	0.242357	28520	0.361167	0	12	2	66803.7	101.208	22.9017	427
18.8277	1040.48	-0.810902	857.221	20.6033	2	0.0295694	26.3856	0.493437	0.000367347	214.842	3.17347e+08	0.267411	18913	0.347583	0	11	3	62335.7	101.272	22.902	428
17.1305	1021.96	-0.745644	638.025	19.8263	2	0	25.0124	0.553574	0.000367347	87.8119	3.8158e+08	0.222858	20939	0.280858	0	13	3	58260.9	101.336	22.9023	429
17.9946	1028.12	-0.689937	491.654	23.7066	2	0	28.7705	0.46253	0.000330395	7.05906	3.74371e+08	0.294896	23690	0.281425	0	13	2.5	54667	101.4	22.9025	430
19.9553	1026.84	-0.605157	964.347	21.8744	2	0	37.2422	0.441044	0.000330395	60.4249	2.9505e+08	0.303514	21415	0.227383	0	14.5	2	51654.8	101.463	22.9027	431
21.2778	1028.74	-0.250079	1316.74	24.1623	2	0	44.5186	0.322203	0.000301087	237.959	2.51197e+08	0.182928	15143	0.256158	0	14	3	49268.4	101.527	22.9029	432
19.0841	999.664	-0.386159	1086.24	26.3065	2	0.650527	41.4703	0.392371	0.000301087	39.9583	3.13254e+08	0.249093	13179	0.281471	0	11.5	3	47066.2	101.591	22.9031	433
20.8781	1016.24	-0.288172	1205.34	26.6874	2	0.325264	44.6176	0.314785	0.000321763	468.337	2.08024e+08	0.227457	14956	0.337533	0	12	3.5	45030.4	101.655	22.9033	434
21.1716	1005.18	-0.298944	1210.14	26.6466	2	0	36.9586	0.342999	0.000371986	65.3704	2.33781e+08	0.265548	14178	0.338758	0	9	3	43884.3	101.718	22.9034	435
21.5709	1006.46	-0.223563	3257.91	26.2341	2	0.177417	49.1642	0.476789	0.000371986	124.92	2.33703e+08	0.322986	11818	0.3047	0	8	4	43675.3	101.782	22.9035	436
17.5014	1287.42	-0.273029	1524	22.2524	2	0	30.009	0.594455	0.00116477	1691.95	5.40363e+08	0.276134	16683	0.273867	0	18	2	5515.05	99.6142	22.9422	437
17.3207	1277.15	-0.33561	2539	20.2623	1	0	32.5193	0.660865	4.92917e-05	1358.69	4.54742e+08	0.264346	14276	0.238408	0	18	2	11956.5	99.6779	22.9431	438
18.2781	1272.42	-0.337835	2264.62	16.9737	1	0	40.2544	0.696023	4.92917e-05	1640.7	4.56258e+08	0.290982	21097	0.193121	0	16	2	18467.7	99.7416	22.9441	439
18.1171	1271.05	0.109782	2516.65	19.4627	1	0	39.5944	0.634995	3.80584e-05	1314.72	4.20976e+08	0.231346	15302	0.191825	0	15	2	24994.6	99.8054	22.945	440
18.1047	1261.19	0.0662549	1922.7	20.7342	1	0	46.2815	0.714185	3.80584e-05	921.086	4.61773e+08	0.298575	22066	0.350842	0	13	2	31527.4	99.8691	22.9458	441
16.9656	1231.54	0.368161	958.632	13.6391	2	0	50.418	0.767936	3.80584e-05	150.232	3.51855e+08	0.25763	34043	0.40865	0	13	2	38063	99.9328	22.9467	442
16.827	1221.31	0.0974917	1641.35	14.0919	2	0	59.0812	0.74904	2.20004e-05	229.407	3.17234e+08	0.324745	23568	0.181992	0	14	2	44600.3	99.9966	22.9475	443
18.3213	1245.17	0.184359	2819.6	16.4911	2	0	39.3521	0.572521	2.20004e-05	330.547	3.14371e+08	0.192071	28046	0.178492	0	14	2	51138.6	100.06	22.9483	444
20.3375	1266.51	0.119288	2827.08	17.0502	2	0	40.2543	0.419653	2.20004e-05	191.173	3.46372e+08	0.162446	30981	0.177058	0	8.5	1	57677.5	100.124	22.949	445
18.7319	1224.62	0.268583	2823.81	20.5317	2	0	48.7208	0.548978	4.90389e-05	690.007	3.35078e+08	0.212508	13069	0.245262	0	8.33333	1	64216.9	100.188	22.9498	446
20.7414	1256.3	0.336184	1787.71	21.5587	2	0	39.6712	0.294184	0.000413687	1163.87	2.90855e+08	0.109323	34052	0.332658	0	10	2	70756.6	100.252	22.9505	447
21.9737	1249.5	0.432798	979.164	18.3693	2	0	37.692	0.257388	0.000413687	1017.71	2.39353e+08	0.11624	43934	0.317908	0	9.5	2	77296.5	100.315	22.9512	448
20.7394	1228.09	0.332103	1051.49	15.0379	2	0	41.4259	0.341076	0.000312392	383.347	2.77238e+08	0.137311	33720	0.283396	0	9	2	83836.6	100.379	22.9519	449
19.7894	1201.77	0.320674	748.364	15.0785	2	0	40.8799	0.455568	0.000312392	289.377	2.81152e+08	0.125963	32504	0.304154	0	10	1	90376.9	100.443	22.9525	450
20.013	1198.67	0.265434	741.194	14.4116	2	0	40.9517	0.400599	0.000312392	512.311	2.56092e+08	0.155071	49492	0.310377	0	11	2	96917.3	100.507	22.9531	451
20.1048	1191.26	0.254953	1033.36	20.6215	2	0	46.9065	0.446847	0.000312392	344.557	2.71178e+08	0.172973	34737	0.274238	0	11	2	103458	100.57	22.9537	452
19.595	1163.06	0.0489483	601.41	18.961	2	0	56.4099	0.593914	0.000312392	297.097	2.63686e+08	0.257491	29533	0.285242	0	11	2	109998	100.634	22.9543	453
20.3378	1168.51	-0.154386	1532.79	16.2344	2	0	63.4636	0.445001	0.000373426	133.022	2.21063e+08	0.201958	50714	0.297017	27300	11	2	113083	100.698	22.9548	454
20.4245	1154.31	0.035103	543.819	18.0271	2	0	29.6183	0.350376	0.000373426	84.1334	3.0151e+08	0.159014	38414	0.2942	0	11	1	107360	100.762	22.9553	455
20.8431	1142.87	-0.324158	799.588	20.2487	2	0	49.0493	0.350943	0.000294506	8.48101	3.26042e+08	0.176604	45350	0.279548	0	12.5	2	101736	100.825	22.9558	456
19.8609	1125.91	-0.322597	1746.27	18.9099	2	0	55.6245	0.397642	0.000294506	18.0116	2.79306e+08	0.153926	29561	0.29905	0	14	2	96227.4	100.889	22.9562	457
19.8724	1113.66	-0.583904	1134.91	19.4972	2	0	53.7673	0.365207	0.00031339	183.884	2.76561e+08	0.162314	23856	0.305435	0	12.5	2	90856.2	100.953	22.9567	458
19.2547	1094.06	-0.439292	1725.48	17.575	2	0	36.1918	0.433648	0.00031339	379.328	3.1256e+08	0.179854	38560	0.269808	0	11	3	85647.9	101.017	22.9571	459
19.5349	1088.62	-0.459337	5874.8	14.9671	2	0	36.3543	0.449448	0.000306134	171.507	2.87917e+08	0.128874	37318	0.283769	0	12.5	2	80634.1	101.08	22.9575	460
18.5199	1058.34	-0.39158	906.648	19.2982	2	0.0591388	29.9086	0.590583	0.000306134	151.952	3.34797e+08	0.242061	36016	0.292933	0	14	3	75853.3	101.144	22.9578	461
18.4102	1051.99	-0.460942	740.607	15.109	2	0.0295694	49.8544	0.510498	0.000306134	194.816	2.98746e+08	0.213421	39023	0.305354	0	13	2	71352.4	101.208	22.9582	462
18.7963	1038.56	-0.443457	789.215	18.5285	2	0	26.9399	0.490927	0.000284474	271.961	3.78143e+08	0.240713	29583	0.28644	0	12	3	67187.6	101.272	22.9585	463
18.2853	1027.39	-0.909302	770.325	17.6594	2	0	33.4343	0.533216	0.000284474	159.417	3.11684e+08	0.280712	30390	0.30135	0	15.5	3	63425.2	101.336	22.9587	464
18.9084	1027.31	-0.837622	587.069	22.661	2	0	34.1692	0.469686	0.000330395	38.9553	3.22499e+08	0.290902	20410	0.293467	0	15	2.5	60140.8	101.399	22.959	465
20.8958	1035.08	-0.65097	1037.56	22.4738	2	0	32.7818	0.369472	0.000311886	376.992	2.82082e+08	0.280935	21910	0.344871	0	16	3	57399.8	101.463	22.9592	466
20.3738	1012.69	-0.749309	1579.79	24.5759	2	0.118278	38.1788	0.452645	0.000301087	161.875	3.11508e+08	0.260172	11383	0.306679	0	16	3.5	55251.9	101.527	22.9594	467
18.3252	1001.56	-0.681959	1263.33	25.3709	2	0.50268	39.9493	0.466559	0.000301087	109.247	3.06349e+08	0.296189	14866	0.322192	0	16.5	3	52919.8	101.591	22.9596	468
19.9625	997.506	-0.579998	2657.77	23.2974	2	0	49.269	0.421868	0.000301087	284.779	2.46319e+08	0.223182	11025	0.272875	0	17	3.5	51117.8	101.654	22.9598	469
20.2747	988.583	-0.655511	2274.53	24.376	2	0	50.7657	0.433445	0.000301087	192.113	2.39062e+08	0.28859	12318	0.271375	0	11	3	50111	101.718	22.9599	470
20.8376	995.542	-0.422255	1879.13	26.0172	1	0	47.7825	0.550232	0.000301087	328.78	2.65633e+08	0.404687	8586	0.245517	0	10	3.5	49929.7	101.782	22.96	471
17.8309	970.657	-0.316742	1038.7	20.7316	2	0.236555	49.2344	0.616698	0.000425957	130.323	2.07743e+08	0.466076	11071	0.245517	0	9	4	50487.9	101.846	22.9601	472
17.4616	1292.41	-0.436761	3078.43	17.4619	2	0	56.1043	0.705039	0.00116477	5865.2	3.74325e+08	0.341148	31585	0.215079	0	18	2	2895.16	99.5495	22.9977	473
18.7615	1292.74	-0.348318	4091.48	18.7478	2	0	41.1425	0.632985	0.00116477	15291.5	4.15688e+08	0.253194	27986	0.241704	0	18	2	8148.66	99.6132	22.9986	474
18.29	1284.13	-0.498704	3505.1	16.6468	1	0	46.4558	0.680017	4.92917e-05	1143.53	4.58253e+08	0.293605	24398	0.199767	0	18	2	13750.2	99.677	22.9996	475
17.4586	1268.21	-0.383559	1802.33	18.2817	2	0	51.0654	0.671078	4.92917e-05	831.087	6.04412e+08	0.250495	19197	0.161813	0	16	2	19817.8	99.7407	23.0005	476
20.0377	1297.28	0.0631281	3748.34	19.6987	1	0	31.2194	0.422895	4.92917e-05	1334.65	3.23589e+08	0.115197	21294	0.198883	0	15	2	26079.2	99.8045	23.0014	477
19.7202	1282.9	-0.157391	2212.84	18.4187	1	0	29.7018	0.500219	0.000105961	3054.14	3.57057e+08	0.163378	22627	0.259181	0	15	2.5	32417.1	99.8682	23.0023	478
17.7023	1243.66	0.0773881	1071.1	19.8085	2	0	33.7015	0.675396	2.20004e-05	185.866	4.62261e+08	0.196083	15692	0.261483	0	15	2	38803.2	99.932	23.0031	479
16.92	1222.71	0.102926	2173.5	15.9524	2	0	22.988	0.771465	2.20004e-05	269.404	4.46673e+08	0.298631	19305	0.236692	0	15	1.5	45233.6	99.9957	23.0039	480
17.4502	1228.16	0.295805	3185.72	16.2858	2	0	24.8755	0.691362	2.20004e-05	221.249	4.66944e+08	0.295309	20993	0.230225	0	15	2	51691.9	100.06	23.0047	481
19.4549	1255.17	0.566059	3382.43	17.5358	2	0	23.8998	0.498675	2.81213e-05	219.329	4.27248e+08	0.200757	28719	0.215729	0	8	1.5	58168.6	100.123	23.0055	482
21.0631	1260.7	0.420567	1765.91	23.2992	2	0	39.3721	0.422791	0.000413687	987.104	3.15937e+08	0.163661	24803	0.2784	0	8	2	64658.3	100.187	23.0062	483
21.7124	1256.29	0.400702	871.539	21.1446	2	0	43.9089	0.328376	0.000413687	1259.6	2.2148e+08	0.127113	38591	0.303192	0	10	2	71157.5	100.251	23.007	484
21.202	1239.72	0.568921	803.199	18.3893	2	0	46.1372	0.347793	0.000413687	531.099	2.45292e+08	0.139117	49211	0.330737	0	9.5	2	77663.7	100.315	23.0077	485
20.9876	1222.94	0.438119	983.724	17.4409	2	0	43.9869	0.330128	0.000413687	244.008	2.85031e+08	0.12268	34455	0.343012	0	9	2	84175.3	100.378	23.0083	486
19.9117	1203.3	0.243657	857.348	17.1829	2	0	39.791	0.451975	0.000413687	542.172	3.17158e+08	0.198286	35610	0.358508	0	10	1	90691.2	100.442	23.009	487
19.4153	1185.01	0.216736	617.59	16.6273	2	0	36.9379	0.441037	0.000312392	98.716	3.25957e+08	0.14227	35515	0.393508	0	11	2	97210.4	100.506	23.0096	488
19.6583	1183.49	0.174142	758.285	17.1757	2	0	53.7853	0.411305	0.000312392	452.765	2.90304e+08	0.180443	29471	0.32145	0	11	2	103732	100.57	23.0102	489
21.3242	1193.01	0.0290207	670.038	20.2463	2	0	53.0687	0.271543	0.000337546	316.475	2.1445e+08	0.134545	52890	0.233933	24780	11	2	110257	100.634	23.0107	490
21.1057	1179.22	0.00376906	556.155	16.4346	2	0	58.4816	0.265037	0.000373426	120.085	1.82244e+08	0.123114	57033	0.342233	44520	11	2.25	116165	100.697	23.0113	491
19.4192	1140.95	0.00308195	375.829	17.4871	2	0	27.3028	0.469662	0.000294506	51.6628	3.34068e+08	0.181805	32169	0.386025	33285	11	2	110602	100.761	23.0118	492
20.0911	1141.61	-0.213209	800.82	15.7198	2	0	38.7472	0.474291	0.000294506	33.8715	3.26178e+08	0.199796	45621	0.29585	0	12.5	1.75	105152	100.825	23.0123	493
19.0542	1114.26	-0.21515	2627.81	14.515	2	0	49.7797	0.546	0.000294506	72.7603	2.40132e+08	0.268258	31971	0.233583	0	14	2	99831.9	100.889	23.0127	494
18.1934	1092.3	-0.365415	1203.3	19.0761	2	0	50.2138	0.57988	0.00031339	223.925	2.78486e+08	0.291811	28924	0.249171	0	12.5	2.5	94665.5	100.952	23.0132	495
18.9118	1095.23	-0.7326	4461.19	16.7199	2	0	40.1287	0.490746	0.00031339	437.889	3.3119e+08	0.220361	42747	0.236842	0	11	2.5	89678.7	101.016	23.0136	496
19.491	1085.29	-0.708247	7409.76	11.4841	1	0	42.9287	0.48175	0.00031339	1068.94	2.87126e+08	0.0870259	41866	0.272571	0	12.5	2.5	84903.2	101.08	23.014	497
18.298	1053.89	-0.51045	735.868	18.199	2	0.443541	24.2903	0.562023	0.00031339	153.203	3.67888e+08	0.251028	44967	0.274742	0	14	3	80376.8	101.144	23.0143	498
18.6071	1051.67	-0.454145	2011.35	16.7665	2	0.0887083	26.6603	0.499826	0.000306134	149.105	3.2953e+08	0.199172	41092	0.2986	0	13	3	76143.7	101.208	23.0146	499
18.4937	1033.43	-0.315747	840.311	19.5523	2	0	29.9032	0.506306	0.000284474	135.105	3.44879e+08	0.36062	29023	0.266575	0	12	3	72255.6	101.271	23.015	500
19.2562	1035.91	-0.206363	1995.49	17.5862	2	0	35.0333	0.447314	0.000284474	429.883	2.81981e+08	0.185095	31640	0.262467	0	15.5	3	68771	101.335	23.0152	501
19.0305	1023.47	-0.233977	1042.66	22.7559	2	0	32.4626	0.464303	0.000330395	100.273	3.22082e+08	0.269595	22661	0.303996	0	15	3	65754.2	101.399	23.0155	502
20.8306	1031.25	-0.0806651	876.303	25.4384	2	0.0887083	34.8796	0.412675	0.000311886	184.784	2.8933e+08	0.285259	17510	0.370017	0	16	3	63233	101.463	23.0157	503
20.679	1015.28	-0.134002	1698.39	24.5095	2	0.236555	35.1114	0.366647	0.000346435	217.514	2.31207e+08	0.227084	17981	0.302575	0	16	3	61132	101.527	23.0159	504
18.9938	991.884	0.00488683	1694.93	22.699	2	0.384403	40.7549	0.551749	0.000301087	181.222	2.75423e+08	0.327998	17298	0.249487	0	16.5	3	58856.3	101.591	23.0161	505
18.1223	988.611	-0.133954	3005.06	21.5878	1	0	54.3654	0.569636	0.000301087	287.189	2.34543e+08	0.266126	11153	0.225133	0	17	3.25	57241.5	101.654	23.0163	506
21.0461	1003.7	-0.00152935	2629.95	24.3116	2	0	57.1838	0.420107	0.000301087	179.352	2.04829e+08	0.29272	18337	0.252533	0	11	3	56344.2	101.718	23.0164	507
21.2417	995.811	-0.151792	2110.81	23.9091	1	0	55.279	0.41137	0.000301087	384.899	2.35076e+08	0.254784	11782	0.218442	0	10	3.5	56184.5	101.782	23.0165	508
19.3408	966.684	0.0691385	1472.39	22.8395	2	0	43.0804	0.554184	0.000425957	336.48	2.66231e+08	0.366476	8766	0.18985	0	9	3	56681	101.846	23.0166	509
19.238	955.252	0.0525981	1108.83	19.5509	1	0	32.2699	0.544461	0.000425957	293.446	1.42942e+08	0.30994	7419	0.166983	0	9	3	57916.8	101.91	23.0166	510
18.249	953.382	0.0539476	1395.35	20.5953	2	0	60.3768	0.544576	0.000425957	120.933	2.6531e+08	0.347206	9785	0.2196	0	0	3	59846.1	101.973	23.0166	511
17.1571	1295.45	-0.358421	3225.21	18.4242	2	0	58.2946	0.737492	0.00116477	8251.12	4.23926e+08	0.285481	22236	0.206142	0	18	2	2004.36	99.5484	23.0541	512
17.2545	1291.06	-0.332556	2702.14	18.2217	2	0	47.2131	0.76214	0.00116477	20297.1	4.54503e+08	0.312376	20209	0.232017	0	17.5	1.5	8545.49	99.6122	23.0551	513
15.9766	1274.72	-0.451002	2025.99	16.3582	2	0	40.2653	0.800123	0.00116477	2454.06	5.07388e+08	0.359281	22910	0.287342	0	17.5	1	15086.6	99.676	23.056	514
17.9743	1290.8	-0.177881	1481.71	21.5704	2	0	50.1582	0.556844	4.92917e-05	388.793	5.00481e+08	0.244293	20300	0.272708	0	16.5	1.75	21627.8	99.7398	23.057	515
21.1685	1317.6	-0.068528	18538.7	9.92267	1	0	31.0863	0.215371	4.92917e-05	1742.96	2.4772e+08	0.0100043	42786	0.209567	0	16	2.5	28169	99.8035	23.0578	516
21.1092	1303.99	-0.00577285	7187.33	13.0053	1	0	22.2531	0.306127	0.000105961	2607.84	3.28043e+08	0.0840973	34364	0.257662	0	15.5	2.25	34247.6	99.8673	23.0587	517
17.7794	1247.2	0.0353978	1984.31	20.4681	2	0	21.1808	0.710362	2.20004e-05	53.5996	5.65128e+08	0.237051	9487	0.294692	0	15.5	2	40414.1	99.9311	23.0596	518
15.6243	1210.06	0.141414	1572.63	14.6963	2	0	21.0775	0.827435	2.20004e-05	0	5.45863e+08	0.320297	12484	0.26305	0	15.5	1.5	46669.8	99.9949	23.0604	519
18.0848	1242.71	0.503398	3697.88	17.3505	2	0	23.5563	0.658778	2.81213e-05	257.369	4.63676e+08	0.285612	24821	0.243983	0	15.5	2	52969.7	100.059	23.0612	520
19.8627	1258.4	0.460714	2395.93	20.9819	2	0.266125	26.0229	0.385349	0.000500865	1735.94	3.68942e+08	0.149168	28969	0.243533	0	8.5	2	59319.1	100.122	23.062	521
21.8162	1267.45	0.460908	902.024	21.7553	2	0.53225	26.6452	0.36159	0.000500865	660.375	3.23322e+08	0.13997	30914	0.27265	0	8.5	2	65695.3	100.186	23.0627	522
20.653	1242.24	0.64755	782.514	19.3986	1	0	30.2212	0.393847	0.000413687	2432.33	2.98848e+08	0.157221	36985	0.353342	0	11	2	72101	100.25	23.0634	523
20.5101	1229.92	0.564466	880.291	19.0732	2	0	27.9121	0.395831	0.000413687	978.547	3.2134e+08	0.187275	35239	0.329642	0	10	2	78529.1	100.314	23.0641	524
20.0014	1217.42	0.538121	3211.22	11.0784	2	0	39.2845	0.354236	0.000413687	1292.62	3.28861e+08	0.088151	38447	0.32895	0	9	2	84974.4	100.378	23.0648	525
19.4	1197.72	0.255923	4249.76	9.86781	2	0	49.9249	0.474085	0.000413687	1078.91	2.23736e+08	0.115548	55269	0.2636	0	9.5	1.25	91433.3	100.442	23.0654	526
19.9326	1194.42	0.352791	764.677	17.5861	2	0	33.469	0.396624	0.000337546	165.249	3.28672e+08	0.119414	42891	0.279583	0	9.5	2	97903.2	100.505	23.066	527
21.4038	1202.33	0.0933698	676.634	17.678	2	0	53.7416	0.280182	0.000337546	499.824	2.3441e+08	0.118027	57591	0.262183	0	10.8333	2	104382	100.569	23.0666	528
21.0504	1181.77	0.0905319	760.639	20.6387	2	0	50.6179	0.281496	0.000337546	202.376	2.18783e+08	0.113325	40711	0.227642	0	11.5	1	110868	100.633	23.0672	529
21.676	1177.49	0.143584	526.807	19.3039	2	0	42.1031	0.180423	0.000337546	153.944	2.0056e+08	0.0744973	47696	0.321317	27720	11.5	2	117360	100.697	23.0677	530
20.997	1154.12	0.0154102	242.257	18.2095	2	0	27.0837	0.321484	0.000294506	2.05727	2.92704e+08	0.129423	49389	0.343683	0	13	2	114096	100.761	23.0683	531
20.434	1138.36	-0.0021515	495.181	14.4149	2	0	28.9295	0.430955	0.000294506	43.2762	3.03417e+08	0.166821	43136	0.257162	0	13.5	2	108820	100.824	23.0687	532
19.3144	1111.79	0.171801	989.38	15.8413	2	0	68.8978	0.510071	0.000294506	56.1447	2.83438e+08	0.190638	32000	0.202108	0	14	2	103689	100.888	23.0692	533
18.005	1084.04	-0.223252	1562.96	14.955	2	0	53.6973	0.632523	0.00031339	240.285	2.82846e+08	0.260151	40403	0.185225	0	12.8333	2.5	98724.5	100.952	23.0696	534
18.976	1094.44	-0.475191	39387.6	11.7082	2	0	42.4594	0.514097	0.00031339	794.816	3.1831e+08	0.183085	60099	0.145708	0	11	3	93953.4	101.016	23.0701	535
19.3424	1082.63	-0.568925	23911.4	12.7593	2	0.118278	36.3886	0.480707	0.00031339	652.173	2.71726e+08	0.0930401	42815	0.292962	0	13	2	89406.6	101.08	23.0704	536
18.4758	1053.91	-0.579882	783.456	16.7618	2	0.0591388	30.7756	0.559549	0.00031339	305.926	3.02699e+08	0.25992	50388	0.361683	0	15	3	85119.9	101.144	23.0708	537
18.827	1046.69	-0.673066	2864.17	13.9618	2	0	30.8897	0.555372	0.000298282	140.914	2.7224e+08	0.26201	45220	0.337683	0	14	3	81134.7	101.207	23.0711	538
18.7744	1034.93	-0.589269	761.867	18.6249	2	0	27.0307	0.537292	0.000298282	47.4624	3.22426e+08	0.322734	28579	0.280625	0	13	3	77497.4	101.271	23.0714	539
19.7054	1036.17	-0.287189	1056.8	22.6359	2	0	34.4236	0.351463	0.00033225	158.527	3.0045e+08	0.213145	25911	0.283133	0	14	3	74259.2	101.335	23.0717	540
20.1327	1031.38	-0.169816	1000.68	23.6582	2	0.266125	27.7137	0.378077	0.00033225	319.64	2.8082e+08	0.193185	18491	0.308033	0	14	3	71469.5	101.399	23.072	541
19.0229	1017.06	-0.00652295	730.24	26.2783	2	0.443541	28.6152	0.347713	0.000346435	118.854	3.12109e+08	0.219844	13017	0.332542	0	14	3	69140.1	101.463	23.0722	542
20.4241	1009.71	-0.198782	1893.33	24.3992	2	0.236555	31.7472	0.429009	0.000346435	183.823	2.82769e+08	0.239138	15815	0.27055	0	14	3	66925	101.527	23.0724	543
18.2397	984.171	-0.0647288	3025.11	22.1984	2	0.118278	44.2947	0.631321	0.000346435	210.728	2.99977e+08	0.366573	13660	0.242346	0	14	3	64852.9	101.59	23.0726	544
18.5909	986.448	-0.162216	2558.51	23.5203	2	0	42.9292	0.52162	0.000301087	186.898	3.02619e+08	0.336529	13140	0.241092	0	14	3	63391	101.654	23.0727	545
19.3449	977.133	-0.55007	4373.21	23.1529	2	0	43.9311	0.441358	0.000301087	157.239	2.64105e+08	0.227797	13945	0.285408	0	13.5	3	62582	101.718	23.0729	546
21.4802	996.611	-0.455713	4299.87	25.5544	1	0	50.3029	0.423877	0.000425957	432.871	2.29902e+08	0.255967	10210	0.188308	0	13	3.5	62439.4	101.782	23.073	547
18.7007	957.92	-0.563107	1874.28	24.2972	2	0	48.9193	0.585991	0.000417913	178.924	3.03129e+08	0.38562	7641	0.1776	0	8	3	62886.6	101.846	23.073	548
19.6922	956.186	-0.443202	1958.48	21.7342	1	0	38.3323	0.468386	0.000417913	309.011	2.96235e+08	0.282845	11856	0.179608	0	8	3	64002.7	101.91	23.0731	549
19.2276	948.532	-0.398061	2059.06	20.7763	2	0	55.8661	0.452726	0.000417913	160.315	2.63163e+08	0.301209	14310	0.241675	0	0	3	65753.6	101.973	23.0731	550
20.2094	949.685	-0.417139	2414.57	21.2625	2	0	55.7356	0.390316	0.000417913	164.476	1.87229e+08	0.267842	8682	0.231675	0	0	3	64172.3	102.037	23.0731	551
18.4364	1307.46	-0.25601	1969.55	21.9836	2	0	62.5246	0.716496	0.00116477	8709.22	4.06637e+08	0.299542	21601	0	0	18	2	5028.45	99.5474	23.1105	552
17.6088	1293.12	-0.0741678	2218.13	19.7441	2	0	43.268	0.756717	0.00116477	17949.9	4.26575e+08	0.313124	16094	0.280792	0	17	1.5	9845.55	99.6112	23.1115	553
15.7274	1273.79	-0.115674	1696.83	17.8235	2	0	45.9328	0.817209	0.00116477	2325.12	5.06331e+08	0.359972	19399	0.319858	0	17	1	15919.8	99.675	23.1125	554
19.1317	1302.33	-0.0295373	1897.05	19.8904	2	0	61.7328	0.53393	2.16754e-05	80.6454	3.27617e+08	0.23424	22085	0.25195	0	17	2	22260.2	99.7388	23.1134	555
21.3799	1317.93	0.089445	9228.52	13.3942	1	0	36.5943	0.174541	3.19518e-05	782.294	3.82211e+08	0.0297283	42955	0.19665	0	17	2	28690.9	99.8026	23.1143	556
20.9073	1302.77	0.109659	4201.47	16.7115	2	0	20.0198	0.369074	3.19518e-05	155.918	4.13959e+08	0.119056	32032	0.249492	0	16	2.5	35162.4	99.8664	23.1152	557
18.3292	1259.21	0.301148	2665.43	19.3686	2	0	21.1268	0.704901	3.19518e-05	344.504	4.84055e+08	0.178412	11402	0.312108	0	16	2	41655.6	99.9303	23.116	558
16.2343	1214.36	0.116178	2065.34	14.7448	2	0	25.3781	0.781764	1.035e-05	105.577	4.43176e+08	0.275917	15129	0.293208	0	16	2	48161.8	99.9941	23.1168	559
17.5458	1230.73	0.614704	2134.52	17.9208	2	0	21.465	0.692822	2.81213e-05	81.3184	4.47669e+08	0.289644	16558	0.279771	0	16	2	54668.2	100.058	23.1176	560
20.0209	1258.92	0.931078	1581.25	22.5392	2	0.561819	25.2102	0.443214	0.000500865	1192.27	3.65779e+08	0.183004	21065	0.257008	0	9	2	61010.5	100.122	23.1184	561
20.9114	1254.83	0.662469	779.471	21.0121	2	0.147847	25.9318	0.408815	0.000500865	1598.54	3.587e+08	0.158251	32497	0.292175	0	9	1	67263.5	100.186	23.1192	562
21.0475	1246.88	0.570402	803.551	18.1779	2	0	25.1893	0.377226	0.000500865	2253.48	2.97368e+08	0.146023	41155	0.32905	0	11	2	73545.1	100.249	23.1199	563
20.6344	1229.71	0.635398	1170.08	18.7683	2	0	26.4297	0.395076	0.000500865	1044.26	3.46748e+08	0.168753	34542	0.251175	0	10.5	2	79868.1	100.313	23.1206	564
20.4743	1223.33	0.596984	8126.52	8.09893	2	0	33.0293	0.342977	0.000413687	2002.09	2.62519e+08	0.0398296	50187	0.307433	0	10	2	86221.2	100.377	23.1213	565
18.9694	1184.34	0.356832	866.88	16.3654	2	0	26.8524	0.424022	0.000413687	103.884	3.60951e+08	0.164137	24768	0.3307	0	10.5	1	92593.2	100.441	23.1219	566
20.364	1198.9	0.245814	433.522	20.1274	2	0.236555	22.359	0.323136	0.000337546	44.4164	3.41651e+08	0.120915	45415	0.32085	0	10	2	98987.3	100.505	23.1225	567
21.6095	1204.47	0.0204836	726.594	17.8093	2	0.118278	35.5182	0.148211	0.000337546	518.665	2.56365e+08	0.057372	54285	0.34125	0	10.6667	2	105399	100.569	23.1231	568
19.3308	1151.89	0.0463014	472.342	18.7864	2	0	29.8297	0.337657	0.000337546	129.852	3.72222e+08	0.130706	29229	0.272008	0	12	2	111826	100.632	23.1237	569
20.6823	1164.59	0.125386	378.787	17.3049	2	0	33.0217	0.282294	0.000337546	121.141	2.90839e+08	0.113646	47065	0.265108	0	12	2	118266	100.696	23.1242	570
21.5531	1160.43	0.245748	579.716	17.8718	2	0	37.0656	0.233869	0.000337546	394.991	2.64387e+08	0.0936515	61834	0.22545	0	14	2	117818	100.76	23.1247	571
21.4923	1143.2	0.12896	531.125	18.7715	2	0	34.8021	0.26862	0.000337546	208.739	3.02489e+08	0.127978	50307	0.207025	0	14	2.5	112717	100.824	23.1252	572
20.4824	1119.56	-0.0162392	788.181	16.5139	2	0	56.0634	0.367056	0.000337546	92.7865	2.71768e+08	0.15731	34469	0.18875	0	14	3	107771	100.888	23.1257	573
19.185	1090.97	-0.356557	1392.27	17.3589	2	0	38.4442	0.538412	0.00031339	322.167	3.63641e+08	0.289095	24967	0.212887	0	12.5	2.5	103004	100.952	23.1261	574
18.8428	1079.58	-0.458381	5192.3	15.5178	2	0	45.2299	0.530383	0.00031339	562.572	3.79832e+08	0.205309	33501	0.1745	0	11	3	98440.3	101.015	23.1265	575
18.9287	1070.38	-0.528163	6652.81	14.1121	2	0.0887083	36.1749	0.506816	0.00031339	753.255	2.96707e+08	0.161154	29467	0.294183	0	13	2	94110.5	101.079	23.1269	576
18.4156	1049.08	-0.692939	2243.02	17.599	2	0.53225	31.5985	0.50663	0.00031339	306.886	3.25307e+08	0.226287	33278	0.294983	0	15	2	90048	101.143	23.1273	577
18.7342	1041.45	-0.670687	1294.63	18.3978	2	0	27.1944	0.539967	0.000298282	75.8996	3.50932e+08	0.324341	28475	0.269233	0	14	3	86290.7	101.207	23.1276	578
19.5756	1043.52	-0.772054	594.02	21.6241	2	0	30.962	0.389224	0.000298282	57.09	3.2852e+08	0.278155	32825	0.253458	0	13	3	82880	101.271	23.1279	579
21.3359	1053.32	-0.557886	1184.13	20.888	2	0	41.8161	0.306431	0.00033225	273.293	2.58019e+08	0.223681	30477	0.276483	0	14	3	79860.3	101.335	23.1282	580
20.1517	1017.35	-0.498888	1694.84	24.054	2	0.0591388	33.8699	0.444138	0.000346435	237.746	2.93317e+08	0.213186	15466	0.271029	0	14	2.5	77253.5	101.399	23.1285	581
20.4234	1011.88	-0.446138	1594.3	25.2351	2	0	35.6776	0.481503	0.000346435	155.435	2.93439e+08	0.267156	16315	0.2782	0	14	3	75103.7	101.462	23.1287	582
18.595	986.827	-0.256644	2343.86	22.8897	2	0	37.1951	0.56642	0.000346435	264.123	3.0497e+08	0.22803	15771	0.225017	0	14	3	72794.6	101.526	23.1289	583
20.0969	1001.99	-0.281997	3349.77	23.8968	1	0	42.2944	0.402857	0.000346435	304.738	2.61804e+08	0.202728	16473	0.243146	0	14	4	70894.3	101.59	23.1291	584
21.1669	1006.18	-0.361856	3267.88	25.517	1	0	48.4131	0.305265	0.000371954	646.385	2.1987e+08	0.206792	15153	0.205558	0	14	3	69559.4	101.654	23.1292	585
21.3999	1004.47	-0.28753	4609.79	25.07	2	0	53.5104	0.334178	0.000371954	333.746	2.19552e+08	0.203839	14252	0.236917	0	13.5	3	68823	101.718	23.1294	586
21.1608	989.371	-0.732318	4865.31	27.5871	2	0	50.547	0.446297	0.000417913	194.249	2.45146e+08	0.33861	7838	0.193292	0	13	3	68694.6	101.782	23.1295	587
19.3436	958.247	-0.747716	4004.15	24.8635	2	0	64.007	0.492168	0.000417913	145.501	2.81624e+08	0.323879	9662	0.188296	0	8	3	69101.3	101.846	23.1295	588
20.6303	962.573	-0.759792	3183.77	20.8505	2	0	64.2917	0.404387	0.000417913	144.202	1.71899e+08	0.279044	12281	0.233233	0	8	3	70118.5	101.909	23.1296	589
20.7106	950.839	-0.829873	2787.76	22.4587	2	0	42.6555	0.397808	0.000417913	156.708	2.14593e+08	0.269483	15778	0.278467	0	0	3	71720.3	101.973	23.1296	590
15.9987	1274.84	0.218018	2075.69	16.0693	2	0	40.4723	0.782591	0.00116477	19684.9	4.28631e+08	0.321872	13850	0.201167	0	17.5	2	18719.6	99.674	23.1689	591
17.5606	1285.28	0.109281	3240.85	18.2465	1	0	43.385	0.677673	2.16754e-05	512.686	4.22302e+08	0.234219	22911	0.1887	0	17.3333	2	24341.3	99.7379	23.1698	592
19.8629	1306.94	0.19263	4251.39	20.5322	2	0	31.9782	0.337984	3.19518e-05	532.486	4.37083e+08	0.113388	17169	0.211925	0	17	2	30334	99.8017	23.1707	593
19.2017	1284.01	0.0941737	2840.82	18.1671	2	0	23.0987	0.606258	3.19518e-05	292.8	4.768e+08	0.140808	16024	0.240792	0	16	2	36515.4	99.8655	23.1716	594
16.5529	1230.32	0.307198	1466.64	15.945	2	0	25.551	0.809651	3.19518e-05	207.508	4.50847e+08	0.248569	19152	0.283629	0	16	2	42803.9	99.9294	23.1725	595
17.2663	1232.32	0.459172	2183.45	17.0753	2	0	25.7376	0.700583	3.19518e-05	405.554	4.27616e+08	0.242137	20443	0.251575	0	16	2	49158.4	99.9932	23.1733	596
20.3365	1269.37	0.714169	2893.28	20.8469	2	0	26.4919	0.458424	0.000500865	1514.95	3.80338e+08	0.171539	28760	0.239158	0	16	3	55556.2	100.057	23.1741	597
20.7991	1257.91	0.70987	1371.74	21.9075	2	0.147847	28.0147	0.498994	0.000500865	1222.55	3.64469e+08	0.193159	17041	0.273658	0	9	1.5	61983.9	100.121	23.1749	598
19.9329	1237.51	0.509283	965.123	18.159	2	0	25.7125	0.53511	0.000500865	1812.54	3.57892e+08	0.207139	24151	0.269992	0	9	1	68433.2	100.185	23.1756	599
19.8142	1228.2	0.920007	895.266	17.5751	2	0	26.3853	0.451262	0.000500865	1543.68	3.57756e+08	0.168659	32206	0.297425	0	13	1	74898.4	100.249	23.1764	600
20.4148	1225.57	1.08972	877.605	18.5125	2	0	22.4074	0.402353	0.000500865	586.108	3.53484e+08	0.17372	34535	0.272617	0	13.6	1.33333	81375.7	100.312	23.177	601
20.1825	1205.6	0.968879	685.199	18.3516	2	0	21.1847	0.376426	0.000413687	45.1978	3.40681e+08	0.171427	37318	0.379571	0	12.5	1.5	87857.4	100.376	23.1777	602
18.8408	1182.05	0.790259	585.341	17.3142	2	0	21.2466	0.460574	0.000413687	195.085	3.41922e+08	0.164024	36361	0.356092	0	12	1	94129.8	100.44	23.1784	603
19.3384	1183.65	0.433268	335.707	19.3262	2	0.680097	20.257	0.345103	0.000337546	13.2199	3.45144e+08	0.124682	38240	0.3485	0	11	1.5	100435	100.504	23.179	604
20.9431	1196.87	0.213772	1517.7	19.2126	2	0.354833	30.3079	0.128281	0.000337546	781.643	2.8341e+08	0.0496571	53071	0.371625	0	10.75	2	106768	100.568	23.1796	605
20.4841	1167.14	0.356764	611.451	19.7166	2	0	26.7181	0.271237	0.000337546	230.545	3.17506e+08	0.108382	29467	0.337817	0	10.5	2	113123	100.632	23.1801	606
19.0002	1133.78	0.0732479	370.191	19.2148	2	0	28.785	0.426804	0.000337546	137.141	3.52302e+08	0.165214	19336	0.315425	0	10.5	1.25	119493	100.696	23.1807	607
19.8342	1137.19	0.313079	352.189	18.1967	2	0	31.2735	0.375732	0.000337546	66.1613	3.0507e+08	0.145445	38949	0.354167	0	12	1	121748	100.76	23.1812	608
20.7889	1133.92	0.117897	517.11	16.1682	2	0	40.1061	0.273899	0.000337546	212.754	2.59873e+08	0.148435	48396	0.281404	0	12.5	2	116819	100.823	23.1817	609
21.3978	1125.79	0.270664	684.36	19.3321	2	0	36.2712	0.278215	0.0003257	36.1942	3.1745e+08	0.118466	37619	0.282492	0	13	3	112054	100.887	23.1822	610
20.4904	1098.59	-0.204675	672.859	21.0303	2	0	27.0656	0.407969	0.0003257	151.93	3.27492e+08	0.14529	27310	0.282629	0	12.5	2.75	107477	100.951	23.1826	611
19.8909	1081.96	-0.489472	1781.38	19.7439	2	0	42.3978	0.405057	0.00031339	328.047	2.83115e+08	0.143357	26650	0.2543	0	12.1667	3	103112	101.015	23.183	612
18.6212	1056.91	-0.612318	1074.53	18.4967	2	0.118278	33.6383	0.473042	0.00031339	834.257	3.04508e+08	0.211284	16752	0.296808	0	13.5	2.5	98986.3	101.079	23.1834	613
19.2124	1057.12	-0.49345	5211.7	18.2058	2	0.177417	36.0022	0.418599	0.00031339	871.858	3.20122e+08	0.226854	23567	0.295888	0	14.5	3	95132.3	101.143	23.1838	614
18.6498	1035.53	-0.594859	973.343	20.7219	2	0	31.0906	0.481913	0.000298282	43.676	3.49154e+08	0.328323	24963	0.299575	0	14.25	2.5	91583.8	101.207	23.1841	615
20.2669	1042.08	-0.518196	733.37	19.8632	2	0	33.4355	0.341671	0.000298282	84.392	3.22808e+08	0.207207	31657	0.257879	0	14	3	88377.6	101.271	23.1844	616
20.677	1040.96	-0.611362	900.863	20.813	2	0	36.2347	0.248657	0.00033225	314.036	2.87706e+08	0.15919	23933	0.2779	0	11.75	3	85552.3	101.334	23.1847	617
19.1695	1007.42	-0.571022	1326.48	23.4505	2	0	36.3736	0.557835	0.000346435	154.556	3.32166e+08	0.294458	12177	0.255296	0	11.5	3	83105.9	101.398	23.1849	618
18.1605	991.767	-0.549528	2328.16	19.1632	2	0	47.0107	0.662659	0.000346435	178.595	3.17313e+08	0.266014	18859	0.21785	0	11.75	3	80969.5	101.462	23.1852	619
18.7402	990.876	-0.502495	2403.43	20.2892	1	0	44.5288	0.551062	0.000346435	350.581	3.01037e+08	0.244917	17248	0.1671	0	12	3	78723.8	101.526	23.1854	620
21.1242	1014.63	-0.364628	2543.79	23.2898	1	0	44.0052	0.324335	0.000346435	303.846	2.40101e+08	0.165904	18032	0.211562	0	13.75	3	76969.9	101.59	23.1856	621
20.4108	985.565	-0.541894	2771.29	25.2203	2	0	51.1758	0.507676	0.000346435	184.778	2.72291e+08	0.279663	9192	0.216842	0	13.5	2.75	75742.2	101.654	23.1857	622
19.2822	970.663	-0.476749	3564.51	23.8595	2	0	41.353	0.502082	0.000371954	515.617	2.6949e+08	0.230796	12659	0.248633	0	13.5	3	75066.5	101.718	23.1858	623
20.2686	970.932	-0.712757	3920.46	23.7614	2	0	56.454	0.450962	0.000371954	370.255	2.42449e+08	0.224442	11403	0.1855	0	12.5	3	74949.8	101.782	23.1859	624
19.0353	1302.8	-0.163423	1694.71	22.4322	2	0	56.5481	0.700697	2.16754e-05	301.552	3.547e+08	0.258909	9664	0.201167	0	18	2	22927.7	99.6731	23.2254	625
19.8313	1302.58	-0.0135661	2020.61	22.1102	1	0	54.4257	0.589902	2.16754e-05	359.198	2.48656e+08	0.213126	8359	0.1887	0	18	2.5	27708.4	99.7369	23.2263	626
20.3045	1297.13	0.108678	1183.13	22.008	2	0	27.6654	0.659146	3.19518e-05	267.638	3.14723e+08	0.188008	8532	0.240792	0	16	2.33333	38841.1	99.8646	23.2281	627
18.9635	1255.61	0.257823	1541.05	21.2412	2	0	28.884	0.671118	3.19518e-05	445.008	4.33824e+08	0.202057	8240	0.283629	0	16	2	44804.3	99.9285	23.2289	628
19.6813	1239.36	0.676085	892.436	19.4296	2	0	24.1054	0.495806	0.000500865	1937	3.69109e+08	0.191925	13308	0.258667	0	9	2	63381.9	100.12	23.2313	629
18.7058	1221.76	0.725753	1481.4	18.2338	2	0.443541	23.6658	0.609039	0.000500865	1804.9	3.89695e+08	0.235757	20424	0.300965	0	9	1.5	69701.9	100.184	23.2321	630
18.5089	1214.04	1.04195	1026.96	15.1354	2	0.177417	26.8509	0.555169	0.000500865	1326.7	3.68994e+08	0.257885	42541	0.272046	0	16	1	76059.3	100.248	23.2328	631
19.6856	1214.64	1.10925	920.624	15.4081	2	0	25.968	0.44808	0.000413687	578.008	3.54098e+08	0.185014	44933	0.321567	0	15.6667	1.66667	82445.5	100.312	23.2335	632
19.9185	1201.59	1.41736	655.425	16.6097	2	0	21.882	0.404018	0.000413687	121.098	3.05417e+08	0.179563	41478	0.418258	0	15	2	88854.2	100.376	23.2342	633
19.0713	1181.5	1.20698	417.6	17.2038	2	0	21.7596	0.459127	0.000413687	87.9797	3.56483e+08	0.171993	32700	0.358883	0	13.5	1	95280.9	100.44	23.2348	634
19.9839	1193.64	0.728127	335.133	20.4363	2	0.266125	20.7849	0.346991	0.000337546	32.7409	3.41559e+08	0.12437	31002	0.371325	0	12	2	101722	100.503	23.2355	635
20.5632	1178.83	0.254195	866.491	22.3555	2	0.413972	23.0124	0.189159	0.000337546	213.681	3.30067e+08	0.0732227	44198	0.377692	0	10.5	2	108176	100.567	23.236	636
21.0956	1168.95	0.230123	638.198	19.2809	2	0	21.464	0.23531	0.000337546	326.482	2.97936e+08	0.0878346	39609	0.32285	0	9	2	114639	100.631	23.2366	637
19.8004	1137.44	0.359376	552.495	19.3248	2	0	23.0774	0.474121	0.000337546	239.565	3.23652e+08	0.169936	19927	0.320325	0	9	2	121012	100.695	23.2372	638
18.937	1121	0.444253	344.173	19.4445	2	0	25.4395	0.490285	0.000337546	66.7791	3.58318e+08	0.19537	34475	0.300792	0	10	1	125866	100.759	23.2377	639
20.0989	1123.02	0.350758	483.935	18.288	2	0	26.4794	0.31141	0.0003257	188.219	3.36735e+08	0.135011	35194	0.331392	0	11	2	121105	100.823	23.2382	640
20.9382	1117.47	0.301756	494.878	21.2625	2	0	31.3034	0.225242	0.0003257	84.1194	3.65534e+08	0.066846	36525	0.355017	0	12	3	116516	100.887	23.2386	641
20.7557	1101.05	-0.112299	638.579	18.6959	2	0.0591388	32.5115	0.211979	0.0003257	374.436	2.53721e+08	0.0689274	37426	0.326704	0	12.5	2	112121	100.951	23.2391	642
20.798	1087.04	-0.332962	873.744	18.388	2	0	36.5797	0.306268	0.0003257	872.095	2.4955e+08	0.0948443	31086	0.251433	0	13	3	107943	101.015	23.2395	643
18.6253	1045.49	-0.619211	604.604	21.3754	2	0.266125	24.7888	0.460377	0.0003257	396.706	3.72236e+08	0.208936	10581	0.249692	0	13.5	2	104010	101.079	23.2399	644
19.4325	1056.13	-0.489016	1337.25	22.1892	2	0.0887083	32.4168	0.363642	0.000298282	98.0142	3.42182e+08	0.246338	25228	0.289692	0	14	3	100349	101.142	23.2402	645
19.9925	1046.23	-0.583368	1381.97	21.5919	2	0	38.5757	0.311063	0.000298282	130.805	3.21841e+08	0.16376	31230	0.300575	0	14	3.5	96991.7	101.206	23.2406	646
20.6839	1042.94	-0.556605	2499.05	22.1569	2	0	34.4462	0.231995	0.00033225	167.793	3.42233e+08	0.179609	23501	0.2758	0	14	3	93970.2	101.27	23.2409	647
20.981	1041.75	-0.445532	1795.26	20.9246	2	0	44.5272	0.254724	0.00033225	237.635	2.77311e+08	0.165653	29404	0.266025	0	11.5	3	91304.2	101.334	23.2412	648
19.7506	1003.94	-0.606104	1355.35	24.045	2	0	44.712	0.537608	0.000346435	39.0442	3.27553e+08	0.295377	20811	0.251075	0	11	2.5	89013.2	101.398	23.2414	649
18.1799	985.914	-0.577402	1618.44	18.3865	2	0	52.5995	0.620265	0.000346435	175.341	3.01154e+08	0.264941	20913	0.204808	0	11.5	3	86791.2	101.462	23.2417	650
19.6932	998.055	-0.646303	1755.22	21.0324	2	0	47.5855	0.440505	0.000346435	260.014	2.78711e+08	0.250093	21049	0.178642	0	12	3.5	84699.9	101.526	23.2419	651
21.2552	1017.07	-0.520656	2428.7	21.2138	1	0	47.2798	0.316686	0.000346435	348.997	2.34185e+08	0.156913	22034	0.205746	0	13.5	3	83072.4	101.59	23.242	652
19.2948	966.061	-0.66047	2506.22	22.0188	2	0	50.9028	0.499403	0.000371954	381.821	2.9524e+08	0.244868	10355	0.241542	0	13	2.5	81936.2	101.654	23.2422	653
20.0343	973.56	-1.00445	2656.95	21.2432	1	0	58.0516	0.396396	0.000371954	610.227	2.33761e+08	0.177994	16149	0.2008	0	12.5	3	81311.9	101.718	23.2423	654
20.4172	968.146	-0.840049	2794.58	22.5811	2	0	52.1627	0.425594	0.000371954	348.879	2.24844e+08	0.195636	12769	0.195333	0	11	2.5	81205.2	101.782	23.2424	655
21.0293	1256.97	0.719179	780.76	19.6175	2	0	24.7221	0.41362	0.000500865	597.236	4.01048e+08	0.160111	18609	0.19455	0	9.5	3	65351.3	100.119	23.2878	656
20.1742	1232.07	0.807817	643.101	20.5799	2	0.473111	22.7419	0.443935	0.000500865	625.571	4.12346e+08	0.171846	19744	0.238279	0	9.5	3	71497.4	100.183	23.2885	657
18.8733	1205.99	0.837911	1237.62	14.0676	2	0.0591388	26.3166	0.494533	0.000298446	1453.68	3.4695e+08	0.191432	34005	0.231842	0	16	1.5	77708.1	100.247	23.2893	658
19.6603	1209.91	1.06323	1628.64	11.8173	2	0	24.4564	0.393665	0.000298446	716.861	2.67583e+08	0.142227	39740	0.279617	0	15.5	1.5	83968.9	100.311	23.29	659
20.3714	1210.55	0.994232	3427.75	10.4624	2	0	29.3647	0.308734	0.000298446	2256.11	2.39085e+08	0.0812669	50463	0.375987	0	14.5	2	90269.6	100.375	23.2907	660
19.6976	1182.21	0.88528	572.234	15.5616	2	0	20.9525	0.344861	0.000298446	172.063	3.10444e+08	0.121359	37534	0.416633	0	13	2	96602.2	100.439	23.2913	661
20.3876	1186.11	0.847317	333.645	21.3601	2	0.0295694	23.4991	0.297567	0.000337546	4.69492	3.3981e+08	0.123719	38724	0.401579	0	11.5	3	102961	100.503	23.2919	662
21.0357	1171.8	0.722772	504.044	21.7854	2	0.0591388	21.512	0.280565	0.000337546	48.9878	2.97502e+08	0.123087	38170	0.336608	0	10	2	109341	100.567	23.2925	663
19.9465	1144.4	0.590504	468.13	19.0923	2	0	22.2158	0.380346	0.000337546	52.3855	3.23232e+08	0.141341	21904	0.269496	0	9	1	115739	100.631	23.2931	664
18.4831	1119.07	0.36681	573.176	20.0994	2	0	21.6101	0.634621	0.000337546	115.952	3.99269e+08	0.237471	13326	0.195742	0	9	2	122153	100.695	23.2936	665
17.652	1107.53	0.267765	695.21	20.9843	2	0	25.4266	0.619043	0.000332018	947.652	3.80979e+08	0.239629	23934	0.279383	0	10.5	2	128579	100.758	23.2942	666
20.0116	1121.75	0.519154	575.34	17.8912	2	0	21.8428	0.418021	0.000332018	771.524	3.04171e+08	0.156911	40136	0.306063	0	11.1667	2	125556	100.822	23.2946	667
20.8256	1111.97	0.457953	606.873	20.7891	2	0	25.4622	0.255003	0.0003257	180.59	2.84391e+08	0.0911177	40240	0.3183	0	12.5	3	121136	100.886	23.2951	668
20.864	1094.81	-0.0404673	1294.91	17.7143	2	0	30.8789	0.248624	0.0003257	512.728	2.57179e+08	0.0687441	35580	0.296967	0	13.25	2	116915	100.95	23.2956	669
20.0453	1073.99	-0.19333	895.808	20.5424	2	0	26.8377	0.379177	0.0003257	641.243	3.13201e+08	0.108725	16961	0.216275	0	14	2	112915	101.014	23.296	670
18.2024	1039.54	0.0286998	490.405	21.6323	2	0.118278	23.9794	0.529447	0.0003257	63.7571	4.13808e+08	0.204947	14342	0.270383	0	14.25	2	109161	101.078	23.2964	671
18.6571	1039.49	-0.114208	802.759	22.2745	2	0.53225	26.4903	0.450463	0.0003257	377.44	3.91326e+08	0.294254	18355	0.256825	0	14.5	2	105679	101.142	23.2967	672
19.3093	1036.7	-0.0107113	823.778	21.656	2	0	29.8021	0.304156	0.000298282	75.4542	3.08669e+08	0.203777	29272	0.245308	0	14.25	2.5	102496	101.206	23.2971	673
20.6122	1032.66	-0.0304964	1168.76	24.0414	2	0.0887083	30.8071	0.347319	0.00033225	52.8887	3.26024e+08	0.273373	23373	0.304967	0	14	3	99641.6	101.27	23.2974	674
19.7866	1012.63	0.0252102	3157.84	20.2797	2	0	40.7367	0.499976	0.00033225	96.3727	2.98037e+08	0.340629	26386	0.24555	0	11	2	97115.9	101.334	23.2977	675
18.7742	989.982	-0.125039	9819.07	16.5665	2	0	42.5715	0.550263	0.00033225	301.542	2.86737e+08	0.262706	28177	0.2268	0	10	2.5	94965.1	101.398	23.2979	676
19.389	996.516	-0.35491	1468.8	20.5152	2	0	40.4663	0.435657	0.00033225	297.36	3.4241e+08	0.233503	20980	0.184525	0	10.5	4	92669.4	101.462	23.2981	677
21.1329	1018.77	-0.151659	1397.61	20.9891	1	0	62.3761	0.286539	0.00033225	400.691	2.64779e+08	0.145779	27379	0.20345	0	11	4	90713.8	101.526	23.2984	678
20.0963	991.427	-0.0700129	1465.97	24.3302	2	0	43.2224	0.383298	0.000371954	436.463	3.59443e+08	0.166178	12124	0.175267	0	12.75	3	89196	101.59	23.2985	679
19.238	964.954	-0.351295	3068.75	20.0368	2	0	54.0825	0.480435	0.000371954	536.803	2.86898e+08	0.216971	17437	0.22065	0	12.5	3	88138.8	101.654	23.2987	680
20.1682	966.849	-0.517875	3163.89	19.6315	2	0	67.6593	0.386618	0.000371954	495.241	2.41051e+08	0.17959	23273	0.201383	0	12	3	87558.8	101.718	23.2988	681
18.8886	941.414	-0.758524	3937.29	20.2494	1	0	56.2159	0.535298	0.000371954	635.765	2.67209e+08	0.186491	21401	0.20095	0	10.5	2.5	87460.5	101.781	23.2989	682
18.5726	935.635	-0.532251	5463.81	16.0115	1	0	53.8561	0.577058	0.000458391	737.499	2.55841e+08	0.198557	21154	0.227375	0	0	3	87780.4	101.845	23.299	683
19.9365	1233.35	0.596685	796.239	20.2246	2	0	26.2572	0.56067	0.000298446	1256.34	4.22765e+08	0.208995	14608	0.249033	0	10	3	67842.4	100.119	23.3442	684
19.2325	1218.41	0.500007	774.405	19.3622	2	0	25.1498	0.543153	0.000298446	1086	3.86996e+08	0.210253	31093	0.265567	0	10	3	73781.3	100.182	23.345	685
19.4553	1208.77	0.668155	1122.9	14.9728	2	0	23.4225	0.470623	0.000298446	697.565	3.74524e+08	0.182177	40178	0.307883	0	14	2.5	79814.4	100.246	23.3457	686
19.5157	1199.01	0.897401	3057.8	9.0288	2	0	24.7416	0.413041	0.000298446	778.207	2.44174e+08	0.126807	46957	0.310192	0	13.3333	2	85922	100.31	23.3464	687
20.8541	1216.33	1.13494	6945.09	5.70247	1	0	28.8852	0.284143	0.000298446	4405.76	1.42776e+08	0	70786	0.325079	0	12	2.66667	92089.1	100.374	23.3471	688
20.3702	1185.17	1.20362	1429.18	13.4625	2	0	22.472	0.321971	0.000298446	1249.42	2.61283e+08	0.103861	39094	0.394117	0	11	2	98304.5	100.438	23.3478	689
20.7177	1183.27	0.981009	501.9	19.162	2	0	22.152	0.350558	0.000337546	87.5974	2.78677e+08	0.164779	48441	0.401487	0	10	2	104560	100.502	23.3484	690
20.9204	1162.43	1.24203	442.926	21.3611	2	0	21.2991	0.301844	0.000332018	23.3465	3.0151e+08	0.131005	39010	0.366425	0	10	2	110848	100.566	23.349	691
18.9317	1125.05	0.457675	518.534	19.1799	2	0	24.4193	0.46856	0.000332018	519.672	3.49453e+08	0.174123	23396	0.388096	0	11	2	117164	100.63	23.3496	692
17.4772	1092.23	0.462691	571.646	20.9406	2	0	28.6218	0.808095	0.000332018	804.79	4.68218e+08	0.291957	15926	0.244992	0	11	2	123503	100.694	23.3501	693
17.359	1086.24	0.703576	630.254	21.1871	2	0	27.5417	0.773939	0.000332018	939.668	4.11355e+08	0.299589	18983	0.2736	0	10	3	129863	100.758	23.3506	694
18.6201	1101.86	0.312865	558.066	21.2319	2	0.236555	25.7185	0.595522	0.000332018	854.145	3.79447e+08	0.223321	26075	0.349796	0	11	2.5	130157	100.822	23.3511	695
20.5268	1106.17	0.460672	663.775	20.811	2	0.443541	23.3108	0.295314	0.000332018	420.359	3.73395e+08	0.106431	35453	0.374467	0	13	2.5	125898	100.886	23.3516	696
20.5005	1091.54	0.256774	3722.95	18.9285	2	0	35.8142	0.30471	0.0003257	526.032	2.66092e+08	0.110089	18318	0.356242	0	15	2	121842	100.95	23.352	697
17.8166	1044.24	0.0214666	825.053	26.4979	2	0	24.4404	0.480474	0.0003257	159.321	4.14566e+08	0.230627	7489	0.2666	0	17	2	118009	101.014	23.3524	698
16.5169	1031.17	0.101953	489.234	23.5875	2	0.266125	23.2324	0.587367	0.0003257	45.1116	4.50938e+08	0.227368	13266	0.276342	0	17	1	114422	101.078	23.3528	699
17.6458	1026.82	0.111411	1206.08	21.3204	2	0.206986	27.2471	0.573414	0.0003257	485.022	3.82821e+08	0.301875	19707	0.250104	0	17	1.5	111105	101.142	23.3532	700
19.0157	1030.72	0.202074	965.842	22.7486	2	0	27.2564	0.410051	0.000298282	61.3218	3.43777e+08	0.263037	27065	0.283092	0	16.5	1.75	108082	101.206	23.3535	701
20.5238	1029.06	0.211779	803.278	22.9895	2	0.0591388	30.626	0.363643	0.00033225	37.3067	2.85438e+08	0.276116	24005	0.310596	0	16	3	105373	101.27	23.3539	702
19.2258	998.565	0.00661839	1214.94	17.4299	2	0	34.5331	0.530309	0.00033225	234.303	2.61826e+08	0.283146	27235	0.331767	0	12.5	3	102980	101.334	23.3541	703
18.5066	988.848	0.110167	1412.19	17.7034	2	0	38.2023	0.545744	0.00033225	336.558	2.40387e+08	0.260007	25882	0.311092	0	11	2.75	100822	101.398	23.3544	704
20.1084	1005.87	-0.0062427	1130.47	20.5811	2	0	45.9223	0.342514	0.00033225	320.525	2.50586e+08	0.203614	24036	0.2447	0	12.5	4	98594.2	101.462	23.3546	705
21.1512	1011.56	-0.420411	1417.94	23.0986	2	0	43.0627	0.300248	0.00033225	299.043	2.73716e+08	0.174338	19563	0.253508	0	13	3.75	96758.4	101.526	23.3548	706
18.7393	959.33	-0.0365345	1206.61	21.7447	2	0	42.0187	0.562508	0.00042074	402.33	3.23632e+08	0.268552	17010	0.221437	0	12	4	95336.9	101.589	23.355	707
19.367	961.696	-0.159093	2206.5	19.237	2	0	51.7046	0.482793	0.000371954	446.489	2.63332e+08	0.205576	27986	0.195433	0	12	4.25	94348.5	101.653	23.3552	708
19.4383	946.629	-0.325491	3449.46	18.0412	1	0	60.1383	0.458985	0.000371954	749.022	2.43989e+08	0.198992	30926	0.194604	0	8.5	4	93806.9	101.717	23.3553	709
18.9862	936.585	-0.629712	6513.61	17.1057	1	0	60.7175	0.526555	0.000458391	780.169	2.39333e+08	0.183445	24024	0.225942	0	7	3	93715.9	101.781	23.3554	710
20.7235	1247.7	0.711304	677.166	21.9397	2	0	26.1442	0.560722	0.000298446	1112.62	2.76783e+08	0.217054	15544	0.280817	0	10	3	70800.1	100.118	23.4007	711
18.4085	1198.59	0.506407	870.464	17.8272	2	0	26.8718	0.630793	0.000298446	1537.12	3.46781e+08	0.244178	25001	0.324286	0	10	3	76509.8	100.182	23.4015	712
18.4918	1191.22	0.584817	820.015	17.8881	2	0	22.9975	0.624274	0.000298446	444.595	3.79635e+08	0.241654	24261	0.298921	0	14	3	82343.3	100.246	23.4022	713
18.9391	1191.42	0.826206	1725.62	12.269	2	0	23.4678	0.517732	0.000298446	756.25	3.12565e+08	0.177288	45488	0.228504	0	13.3333	3	88276	100.31	23.4029	714
20.9233	1211.36	0.936655	13782.8	5.53908	1	0	29.4509	0.295468	0.000298446	4396.18	1.5128e+08	0.00381249	72753	0.258067	0	10.5	2.5	94289.3	100.374	23.4036	715
20.3335	1175.31	0.916102	3495.73	15.1451	2	0	23.7998	0.357507	0.000298446	1295.19	3.548e+08	0.0996408	31140	0.320271	0	9.5	2.5	100369	100.438	23.4042	716
18.6792	1139.86	0.980239	503.468	20.0879	2	0	20.6359	0.443644	0.000332018	0	4.04798e+08	0.165811	25319	0.348867	0	10.5	2	106503	100.502	23.4049	717
21.0064	1163.87	0.82265	647.196	20.4228	2	0	22.3857	0.297158	0.000332018	104.999	2.87296e+08	0.138828	43059	0.394821	0	10.5	2	112682	100.566	23.4055	718
20.7165	1145.48	0.69496	3129.71	19.2378	2	0	27.7526	0.217493	0.000332018	1068.98	3.1413e+08	0.0841908	33856	0.408079	0	11	2	118901	100.629	23.406	719
20.1266	1122.89	0.715801	3207.27	17.4852	2	0	31.8084	0.397265	0.000332018	1886.71	3.0212e+08	0.109843	28966	0.298131	0	11	2.5	125152	100.693	23.4066	720
18.0895	1082.29	0.459536	644.859	21.4773	2	0	28.2581	0.772283	0.000332018	1126.32	4.13796e+08	0.298948	15602	0.202767	0	10.5	3	131432	100.757	23.4071	721
18.1397	1086.05	0.31166	733.803	18.5804	2	0	27.1868	0.508638	0.000332018	1518.98	3.74874e+08	0.142577	22996	0.270823	0	11.5	3	134890	100.821	23.4076	722
19.7682	1085.55	0.243776	666.409	21.9738	2	0	23.753	0.345695	0.000332018	74.6363	3.7218e+08	0.133817	30430	0.330258	0	13.5	3	130786	100.885	23.4081	723
20.3296	1085.28	0.141674	2320.85	18.1566	2	0	32.2935	0.328308	0.0003257	975.05	3.17789e+08	0.0980386	20723	0.335833	0	15.25	2	126886	100.949	23.4085	724
18.7162	1054.25	0.0735056	734.869	25.7486	2	0	25.63	0.512907	0.0003257	218.214	3.46305e+08	0.325613	10256	0.256808	0	17	2	123210	101.013	23.4089	725
16.4642	1016.11	0.194332	619.607	25.8676	2	0.325264	23.3213	0.624655	0.0003257	10.0142	4.55089e+08	0.290162	8223	0.299792	0	17	1.5	119779	101.077	23.4093	726
17.7729	1020.35	0.095739	1351.05	22.0832	2	0.0591388	27.5929	0.558872	0.000346688	109.849	3.58816e+08	0.276912	15042	0.275065	0	17	2	116615	101.141	23.4097	727
18.5224	1017.11	-0.0120542	2316.45	20.0497	2	0	25.3812	0.46602	0.000287581	99.1902	3.17573e+08	0.300658	17732	0.291808	0	16.75	2.5	113738	101.205	23.41	728
19.87	1021.04	0.0758418	1187.6	24.6928	2	0.147847	28.5784	0.400958	0.0003105	11.9725	3.05906e+08	0.278307	21130	0.300967	0	16.5	3	111153	101.269	23.4103	729
19.0239	989.614	0.205099	2417.77	18.743	2	0.0295694	36.7368	0.544195	0.0003105	147.938	2.85077e+08	0.250154	20323	0.213321	0	13	3	108887	101.333	23.4106	730
18.7629	986.212	0.0770106	2355.5	19.9313	2	0	32.6463	0.507176	0.00033225	294.827	3.10423e+08	0.267004	27186	0.22606	0	11.5	3.5	106661	101.397	23.4109	731
20.7734	1018.21	-0.238049	1189.13	19.7769	2	0	46.7557	0.314545	0.00033225	325.592	2.43107e+08	0.15017	28488	0.264567	0	12	4	104558	101.461	23.4111	732
20.1183	979.851	-0.161809	1068.37	22.1329	2	0	38.2144	0.457566	0.00042074	302.442	3.16479e+08	0.240887	12742	0.241821	0	11.5	4	102828	101.525	23.4113	733
18.5095	951.57	-0.144397	2947.9	16.6198	2	0	52.486	0.584347	0.00042074	476.758	2.67873e+08	0.262682	27279	0.211463	0	11.5	4	101492	101.589	23.4115	734
19.2856	954.825	-0.458498	31064.2	14.5315	1	0	58.3283	0.463607	0.00042074	579.475	2.61745e+08	0.191425	33750	0.193513	0	12.5	4	100564	101.653	23.4117	735
19.2387	944.412	-0.518584	23376.9	16.3344	1	0.0591388	56.0861	0.462218	0.000458391	602.19	2.39742e+08	0.178923	37929	0.225683	0	9.33333	4	100056	101.717	23.4118	736
19.4919	1202.13	0.454331	658.821	18.7151	2	0	23.96	0.645256	0.000298446	810.278	4.04704e+08	0.249777	27775	0.250396	0	0	3	79637.3	100.181	23.4579	737
17.9781	1173.76	0.747753	843.498	17.0084	2	0	22.8978	0.680012	0.000298446	707.812	4.15994e+08	0.263231	20242	0.247929	0	11	3	85257	100.245	23.4587	738
18.3095	1175.73	0.8602	1057.98	14.1612	2	0	22.4682	0.627401	0.000298446	438.607	4.10607e+08	0.200992	35691	0.193842	0	9.93333	3	91000	100.309	23.4594	739
20.7117	1197.97	0.823167	5315.82	9.16863	2	0	29.9611	0.314649	0.000298446	1948.71	2.2782e+08	0.0589354	59174	0.260263	0	7	3.5	96844.3	100.373	23.46	740
20.2881	1163.37	0.923414	2876.08	15.3724	2	0	21.7147	0.370327	0.000298446	718.99	3.25487e+08	0.0860113	28442	0.318592	0	8.5	2.5	102773	100.437	23.4607	741
18.3333	1126.19	0.899727	608.76	17.3162	2	0	23.5593	0.485149	0.000332018	186.772	3.62618e+08	0.1878	26523	0.327804	0	14	2	108771	100.501	23.4613	742
20.0192	1139.59	1.10632	605.259	16.6644	2	0	22.5728	0.396651	0.000332018	281.973	2.97028e+08	0.171967	39140	0.357533	0	12.5	1.5	114829	100.565	23.4619	743
20.1002	1126.47	1.2304	3409.87	19.502	2	0	22.2395	0.243052	0.000332018	391.569	3.13296e+08	0.132825	30077	0.264275	0	11	2	120937	100.629	23.4625	744
21.4456	1150.12	1.02934	17824.3	8.88169	1	0	34.9621	0.201426	0.000332018	3468.96	1.45776e+08	0.0202148	52817	0.189246	0	11	2.5	127088	100.693	23.4631	745
19.613	1093.23	0.664744	1702.07	18.8698	2	0	31.9076	0.473394	0.000332018	2458.89	3.85584e+08	0.213791	23948	0.19315	0	12	2	133277	100.757	23.4636	746
18.6672	1068.69	0.259052	758.963	19.1594	2	0	30.6839	0.498027	0.000332018	1779.54	4.06272e+08	0.231342	14458	0.211883	0	12.3333	2.5	139497	100.821	23.4641	747
18.3647	1067.46	0.42024	552.437	22.1696	2	0.147847	22.3835	0.472646	0.000332018	614.389	3.55155e+08	0.170762	27704	0.299342	0	13	3	135786	100.885	23.4645	748
19.403	1064.89	0.288204	610.382	25.5734	2	0.118278	23.2488	0.462764	0.000332018	1017.21	3.5483e+08	0.179134	17805	0.304229	0	14	2.5	132034	100.949	23.465	749
16.6932	1032.03	0.0536859	449.053	25.9991	2	0.0295694	21.9502	0.667567	0.0003257	163.804	4.50506e+08	0.333436	9246	0.25945	0	15	1	128506	101.013	23.4654	750
15.6539	1013.56	0.124835	796.292	22.8884	2	0.650527	28.5131	0.754931	0.0003257	254.409	4.46312e+08	0.302668	14384	0.240875	0	15.5	1.5	125220	101.077	23.4658	751
16.7828	1010.23	-0.151461	1072.08	22.5737	2	0.354833	31.8353	0.542822	0.000287581	131.998	4.02452e+08	0.226288	14990	0.255333	0	16	3	122196	101.141	23.4662	752
19.0525	1016.73	-0.098247	1479.51	22.8032	2	0	27.9658	0.460174	0.000287581	131.248	3.24665e+08	0.245699	27317	0.300925	0	16.5	2.5	119453	101.205	23.4665	753
19.8	1009.16	0.336329	1344.88	26.2749	2	0.53225	29.2815	0.458301	0.0003105	31.6987	3.13418e+08	0.298044	22794	0.269917	0	17	3	116982	101.269	23.4668	754
19.0544	991.432	0.0334719	3295.71	18.2974	1	0.0591388	41.9277	0.546687	0.0003105	209.499	2.42131e+08	0.236517	23004	0.250367	0	14.5	3	114831	101.333	23.4671	755
18.4669	985.446	-0.0517495	2363.11	23.921	2	0	33.6397	0.466678	0.0003105	134.444	3.10934e+08	0.287701	13609	0.226504	0	13	3.5	112544	101.397	23.4674	756
21.1145	1017.44	-0.0271687	2044.96	21.3425	2	0	49.2919	0.289078	0.0003105	152.213	2.65857e+08	0.138011	24841	0.242042	0	12.5	3	110553	101.461	23.4676	757
19.7538	967.56	-0.271059	1477.46	20.0317	2	0	51.3906	0.451499	0.000360353	753.025	2.68294e+08	0.230701	11648	0.212875	0	11	3.5	108919	101.525	23.4678	758
19.5892	963.073	-0.0380827	2619.2	16.4645	2	0	69.9107	0.420901	0.00042074	332.455	2.0634e+08	0.195515	26835	0.229108	0	10	4	107658	101.589	23.468	759
19.3208	948.435	-0.191163	8332.84	14.672	2	0	49.9001	0.479971	0.00042074	570.396	2.54748e+08	0.252681	31403	0.249042	0	12	4	106784	101.653	23.4681	760
19.0281	938.248	-0.537391	10176.5	15.134	2	0.118278	48.3746	0.505916	0.00042074	556.406	2.37351e+08	0.233918	32373	0.261396	0	0	4	106306	101.717	23.4683	761
19.8614	1201.09	0.242469	822.546	24.697	2	0	23.9266	0.587601	0.000298446	413.057	3.62601e+08	0.227459	14079	0.260192	0	0	3	83118.6	100.18	23.5144	762
20.1829	1195.36	0.63035	681.274	20.6306	2	0	21.7703	0.514999	0.000298446	126.02	3.93096e+08	0.199354	28357	0.330421	0	11	3	88517.6	100.244	23.5151	763
18.1587	1151.78	0.676343	884.628	16.092	2	0	22.7082	0.569707	0.000298446	394.56	4.14832e+08	0.204779	27543	0.280342	0	11	3	94061.7	100.308	23.5158	764
20.3057	1179.86	0.829294	2291.37	11.7336	2	0	22.476	0.339522	0.000242261	1384.5	2.95896e+08	0.106785	50119	0.294142	0	7	3.25	99726.7	100.372	23.5165	765
20.2875	1153.41	0.899255	927.814	13.9847	2	0	22.9971	0.36468	0.000242261	358.082	2.97965e+08	0.141166	34640	0.38115	0	8.5	3.5	105493	100.436	23.5172	766
18.7629	1124.35	0.843807	653.107	16.1795	2	0	23.1612	0.46677	0.000332018	327.577	3.40821e+08	0.174662	35647	0.4002	0	14	2.5	111345	100.5	23.5178	767
18.9908	1115.75	1.08861	685.938	15.2436	2	0	25.5286	0.520432	0.000332018	647.413	3.07542e+08	0.209516	39679	0.329267	0	12.5	2	117270	100.564	23.5184	768
19.0411	1103.77	1.33448	1044.12	18.5287	2	0	22.3981	0.4229	0.000332018	261.892	3.68774e+08	0.201901	31352	0.252175	0	11	2	123257	100.628	23.519	769
21.18	1142.78	0.74867	44479.6	8.6036	1	0	36.7428	0.199747	0.000332018	2711.83	1.75194e+08	0.00552297	62920	0.191392	0	11	2.5	129298	100.692	23.5195	770
20.7486	1103.07	0.499468	5814.49	18.2633	2	0	27.1652	0.302458	0.000332018	1929.05	4.02226e+08	0.120739	32269	0.176233	0	12	2	135386	100.756	23.52	771
18.9233	1058.79	0.455226	836.164	15.8413	2	0	29.3046	0.527236	0.000332018	1842.32	3.43854e+08	0.220419	23443	0.259413	0	12.3333	2.5	141514	100.82	23.5205	772
18.2429	1048.56	0.50386	543.647	20.6841	2	0.206986	27.9782	0.658145	0.000332018	1064.63	3.50852e+08	0.27175	24779	0.387325	0	13	3.5	140886	100.884	23.521	773
18.4816	1043.45	0.292662	337.568	27.1318	2	0.206986	24.2889	0.650042	0.000332018	291.65	3.65078e+08	0.251629	14129	0.393783	0	14	3	137274	100.949	23.5215	774
15.4379	1016.08	0.0777282	293.144	25.1877	2	0.206986	23.0041	0.777218	0.0003257	85.3115	4.59981e+08	0.300858	8890	0.293583	0	15	2	133884	101.013	23.5219	775
16.4651	1013	0.221612	985.426	25.9894	2	0.0887083	31.5293	0.692194	0.000287581	157.868	3.83679e+08	0.314144	13468	0.285433	0	15.5	2.5	130733	101.077	23.5223	776
19.2583	1021.79	0.147592	2558.88	20.9101	2	0	32.9747	0.417848	0.000287581	315.721	3.00274e+08	0.221055	28517	0.253279	0	16	3	127840	101.141	23.5226	777
19.746	1011.45	0.364455	1437.94	24.6978	2	0	28.6349	0.445593	0.000287581	59.3671	3.29791e+08	0.317377	20983	0.266708	0	16.5	3	125209	101.205	23.523	778
19.7156	1000.55	0.161309	1760.69	24.9747	2	0.354833	35.6114	0.531421	0.000305089	170.673	3.02145e+08	0.25371	19851	0.254271	0	17	3	122854	101.269	23.5233	779
17.7983	967.835	0.301371	2239.93	20.4429	2	0	44.9334	0.667251	0.000305089	292.587	3.14574e+08	0.237628	14148	0.2142	0	15.3333	3	120681	101.333	23.5236	780
19.0234	984.452	0.205454	2705.38	20.5666	2	0	39.5181	0.477444	0.0003105	158.356	2.6473e+08	0.225246	20587	0.22145	0	13	3.5	118466	101.397	23.5238	781
20.83	998.691	0.0487724	2053.53	21.3055	2	0	45.6213	0.276948	0.0003105	111.167	2.75628e+08	0.129386	21810	0.248358	0	12.5	3	116576	101.461	23.5241	782
19.6125	965.331	-0.0752435	1810.21	18.7371	2	0	64.1469	0.288527	0.000360353	291.949	2.41334e+08	0.154645	22342	0.223825	0	11	3.5	115028	101.525	23.5243	783
20.6551	979.57	-0.162198	2632.6	14.9908	1	0	78.3849	0.334842	0.000360353	894.587	2.10518e+08	0.120677	32851	0.213987	0	10	4	113835	101.589	23.5245	784
19.2744	942.577	-0.343616	1937.3	18.9543	2	0	71.6283	0.492919	0.00042074	458.704	2.27196e+08	0.206072	17695	0.235483	0	12	3.25	113008	101.653	23.5246	785
17.6155	928.164	-0.391503	3656.78	19.7737	2	0	71.4659	0.584475	0.00042074	222.82	1.78697e+08	0.247796	12007	0.217867	0	0	3	112556	101.717	23.5248	786
20.5235	1220.44	0	642.238	22.5275	2	0	23.7706	0.480826	0.000298446	352.376	1.98567e+08	0.186126	14483	0	0	0	0	86911.4	100.179	23.5708	787
19.9747	1182.6	0.630965	801.447	20.6399	2	0	23.0929	0.494735	0.000298446	261.487	3.38905e+08	0.19151	25571	0.332083	0	11	3	92088.3	100.243	23.5716	788
20.3609	1175.75	0.826711	771.493	18.165	2	0	24.7819	0.450056	0.000298446	613.996	3.25353e+08	0.162601	28373	0.322125	0	11	3	97429.5	100.307	23.5723	789
20.6825	1165.93	0.647803	929.487	13.4661	2	0	22.0577	0.330756	0.000242261	393.502	2.86211e+08	0.14852	42263	0.299867	0	7	3	102909	100.372	23.573	790
21.0398	1157.75	0.641336	629.271	10.0715	2	0	22.5386	0.298229	0.000242261	995.906	2.18231e+08	0.125338	70437	0.318558	0	11	3	108507	100.436	23.5736	791
20.4237	1137.45	0.756586	921.921	13.041	2	0	25.5341	0.370653	0.000332018	1043.22	2.7061e+08	0.172174	44618	0.345463	0	15	3	114204	100.5	23.5743	792
19.0042	1104.61	0.958053	690.25	18.0363	2	0	23.4374	0.572743	0.000332018	265.401	3.39998e+08	0.206417	32250	0.365883	0	14	2	119988	100.564	23.5749	793
18.3278	1091.16	0.98517	757.893	16.5585	2	0	29.3456	0.542564	0.000332018	889.225	3.41971e+08	0.26657	31852	0.319067	0	13	2	125846	100.628	23.5754	794
20.6455	1118.37	0.64389	2199.76	14.3045	2	0	28.6421	0.25355	0.000332018	2067.92	3.67807e+08	0.0841273	40397	0.315625	0	13	2	131769	100.692	23.576	795
20.5152	1087.99	0.317581	1019.49	20.3065	2	0	25.2882	0.258711	0.000332018	944.506	3.75681e+08	0.0904545	22432	0.304675	0	14.5	2	137747	100.756	23.5765	796
18.2377	1045.21	0.490149	686.845	22.1907	2	0	24.0085	0.687504	0.000332018	720.114	4.16309e+08	0.256274	11565	0.261558	0	13.6667	2.5	143774	100.82	23.577	797
17.4137	1033.49	0.380385	706.855	18.6261	2	0.206986	30.5225	0.762548	0.000332018	1782.08	3.58481e+08	0.29518	29339	0.305283	0	12	3	146077	100.884	23.5775	798
16.7177	1022.97	0.306817	446.636	22.6905	2	0.561819	23.2625	0.817131	0.000423913	354.153	4.17936e+08	0.278352	13092	0.323608	0	12.5	2	142596	100.948	23.5779	799
15.2605	1007.86	0.00706556	544.104	23.4605	2	0.473111	25.6177	0.841932	0.000423913	64.2112	4.39217e+08	0.315046	9358	0.328758	0	13	1	139335	101.012	23.5784	800
17.3799	1008.2	0.217012	1202.32	23.4843	2	0	29.5211	0.711236	0.000287581	280.906	3.60288e+08	0.275317	16841	0.25175	0	14.5	2	136310	101.076	23.5788	801
19.4559	1018.26	0.309948	2320.15	21.3389	2	0	33.3952	0.414032	0.000287581	144.604	3.37738e+08	0.219799	33647	0.206646	0	16	3	133538	101.14	23.5791	802
20.5038	1015.17	0.504861	1508.54	22.8326	2	0	39.2042	0.343001	0.000305089	123.66	3.06629e+08	0.207128	26284	0.248667	0	16	3	131010	101.204	23.5795	803
19.6039	985.01	0.358169	2323.16	20.7871	2	0.709666	35.811	0.48798	0.000305089	237.119	2.81687e+08	0.264454	19384	0.236896	0	16	3	128761	101.268	23.5798	804
17.9465	963.227	0.310559	2143.8	20.7273	2	0	38.5246	0.636298	0.000305089	312.842	3.04086e+08	0.246309	15425	0.220817	0	16.3333	3	126532	101.332	23.5801	805
19.6371	985.021	0.325767	1467.87	20.0631	2	0	38.0028	0.416415	0.000305089	151.9	2.68167e+08	0.193431	26919	0.236946	0	16	3.5	124421	101.397	23.5803	806
20.6278	985.427	0.0705685	1616.51	22.082	2	0	41.9421	0.293733	0.0003105	91.1266	2.51817e+08	0.142129	18470	0.216283	0	13.5	3	122623	101.461	23.5806	807
20.3545	979.908	-0.290552	2775.96	17.0659	2	0	58.4367	0.30599	0.000360353	550.856	2.24658e+08	0.139984	26656	0.211108	0	12	3	121151	101.525	23.5808	808
20.3055	962.664	-0.154422	4115.88	15.6239	1	0	78.8474	0.400803	0.000360353	874.631	1.77089e+08	0.148943	26604	0.225733	0	11	3	120019	101.589	23.581	809
18.5531	931.15	-0.349696	2578.21	20.546	2	0	72.9004	0.627749	0.000360353	783.72	2.32538e+08	0.226241	18283	0.237792	0	11	3	119236	101.653	23.5811	810
21.0176	1151.86	0.732707	829.864	9.24436	2	0	23.9452	0.290199	0.000242261	497.436	1.55188e+08	0.108323	69875	0.317108	0	0	3	111789	100.435	23.6301	811
20.2543	1128.36	0.632811	1241.39	13.2089	2	0	25.4759	0.369405	0.000242261	499.117	2.68271e+08	0.138229	40935	0.316217	0	15	3	117328	100.499	23.6307	812
18.6221	1089.06	0.64283	793.15	19.1391	2	0	27.0334	0.605049	0.000332018	826.927	3.66331e+08	0.234213	17176	0.303042	0	14	2.5	122965	100.563	23.6313	813
17.8927	1078.14	1.00554	862.829	17.6839	2	0	26.3501	0.546624	0.000332018	802.976	3.38818e+08	0.194669	26932	0.332008	0	13	2	128687	100.627	23.6319	814
19.2775	1079.72	0.798544	1358.6	15.9597	2	0	25.8656	0.464414	0.000332018	1085.8	2.9467e+08	0.275652	26238	0.34305	0	13	2	134485	100.691	23.6325	815
20.1908	1083.77	0.20546	2062.63	18.7804	2	0	31.3944	0.287403	0.000423913	1035.11	3.43983e+08	0.0801019	21516	0.328983	0	15	2	140347	100.755	23.633	816
18.8618	1043.29	0.349941	1291.95	21.6315	2	0	27.397	0.39851	0.000332018	550.277	3.68567e+08	0.122502	15633	0.281775	0	14	2	146268	100.819	23.6335	817
18.7248	1033.7	0.213982	1172.19	20.901	2	0.0591388	26.9709	0.675422	0.000332018	1177.37	3.84711e+08	0.290504	19069	0.286183	0	12	2	151347	100.884	23.634	818
15.8217	1006.36	0.334067	700.415	21.9349	2	0.591388	25.8476	0.905592	0.000423913	403.038	4.31441e+08	0.338464	8840	0.299621	0	12	2	147991	100.948	23.6344	819
15.9426	1001.84	0.121397	1325.14	24.0354	2	0.295694	27.5923	0.799213	0.000321801	332.913	4.0763e+08	0.297474	7583	0.227858	0	12	1	144851	101.012	23.6348	820
18.1521	1007.38	0.169286	1077.23	22.6649	2	0	30.2274	0.615413	0.000321801	543.141	3.0809e+08	0.255241	12555	0.290017	0	14	2.5	141944	101.076	23.6352	821
19.4724	1008.75	0.179396	1111.48	21.8544	2	0	31.6853	0.425052	0.000321801	369.887	3.21643e+08	0.240928	22811	0.241292	0	16	3	139277	101.14	23.6356	822
19.5006	993.502	0.319737	1236.23	21.889	2	0	32.4517	0.427472	0.000305089	136.254	3.31616e+08	0.226146	15678	0.225233	0	16	3	136851	101.204	23.6359	823
18.714	969.016	0.284257	3372.32	20.7782	2	0.473111	39.9531	0.628866	0.000305089	285.923	3.16006e+08	0.300233	25021	0.202458	0	16	3	134700	101.268	23.6363	824
17.5939	958.55	0.270889	2766.29	18.1492	2	0	35.9151	0.650875	0.000305089	300.072	3.16177e+08	0.231796	19671	0.19365	0	16.4667	3	132419	101.332	23.6365	825
20.0233	985.473	0.185225	1715.63	17.0094	2	0	35.937	0.377597	0.000305089	161.866	2.61314e+08	0.199761	31345	0.236504	0	16	3.75	130403	101.396	23.6368	826
20.649	981.425	0.0812907	1047.57	21.1021	2	0	30.8762	0.37094	0.000340846	114.072	2.94958e+08	0.206769	19666	0.243417	0	13.5	4	128689	101.46	23.637	827
19.3288	958.217	-0.276257	2202.63	17.3416	2	0	55.2422	0.400587	0.000340846	296.707	2.04336e+08	0.211454	24540	0.218592	0	12	3.25	127288	101.525	23.6373	828
18.914	938.986	-0.25333	2259.97	19.7883	2	0	48.0846	0.561909	0.000340846	425.45	2.33224e+08	0.201977	10799	0.241356	0	11	3	126211	101.589	23.6374	829
16.5866	919.526	-0.34648	1863.22	17.8677	2	0	55.7497	0.858273	0.000360353	339.992	1.95075e+08	0.2889	14121	0.255658	0	11	2.5	125466	101.653	23.6376	830
20.9963	1140.38	0.734822	1929.73	9.95335	2	0	23.4838	0.305709	0.000242261	729.866	1.55555e+08	0.0699275	56902	0.2897	0	13.6667	3	115318	100.434	23.6866	831
20.8773	1131.24	0.779019	9207.99	7.66093	2	0	31.9251	0.325238	0.000242261	2623.69	1.8448e+08	0.0484225	54279	0.294942	0	14	3	120695	100.498	23.6872	832
18.6126	1075.4	0.649433	1142.91	17.7288	2	0	23.8938	0.574085	0.000242261	715.388	3.47519e+08	0.203179	17607	0.2511	0	12.5	2.75	126182	100.562	23.6878	833
18.7043	1075.43	0.6033	1760.72	16.2198	2	0	28.3387	0.504106	0.000343526	593.983	3.13363e+08	0.210749	28437	0.328625	0	12	2.5	131764	100.627	23.6884	834
18.5105	1057.55	0.294749	1377.33	17.3373	2	0	29.0952	0.65389	0.000332018	907.007	3.6312e+08	0.396553	21048	0.243104	0	12	2.75	137432	100.691	23.6889	835
18.226	1050.51	0.257818	2334.87	19.5627	2	0	27.5476	0.567995	0.000423913	643.301	4.05558e+08	0.246253	14956	0.247942	0	13.5	3	143174	100.755	23.6895	836
20.4856	1064.27	0.342035	3356.91	19.7623	2	0	33.7027	0.301344	0.000423913	1003.4	3.55376e+08	0.112761	30507	0.276863	0	13	3	148982	100.819	23.69	837
19.4933	1033.17	0.484702	1239.09	21.5979	2	0	27.9479	0.487737	0.000423913	508.735	3.66608e+08	0.182058	16781	0.257367	0	12	3	154848	100.883	23.6904	838
17.8239	1002.07	0.110069	1189.93	22.8384	2	0	28.2283	0.69239	0.000423913	745.762	4.06724e+08	0.259646	13967	0.244746	0	11.75	2.25	153451	100.947	23.6909	839
16.4451	986.57	0.153199	1036.9	23.0802	2	0	27.2221	0.835232	0.000321801	133.923	4.26914e+08	0.29745	8683	0.2586	0	11.5	2	150426	101.011	23.6913	840
17.1198	987.047	0.560555	793.852	23.6718	2	0	27.3621	0.702592	0.000321801	74.3235	3.67535e+08	0.398891	15208	0.252175	0	12.75	2.5	147629	101.075	23.6917	841
19.3848	1002.81	0.441412	3646.85	20.6411	2	0	35.0096	0.403857	0.000319875	486.008	2.92116e+08	0.225118	25902	0.280833	0	14	3	145055	101.14	23.6921	842
19.1878	977.029	0.251271	1790.92	20.1123	2	0.236555	32.1575	0.537892	0.00034342	69.8666	3.35473e+08	0.295533	21095	0.246742	0	14	3	142728	101.204	23.6924	843
18.1173	957.536	0.197211	1709.74	19.1102	2	0.0295694	36.8514	0.62768	0.000305089	124.042	3.21268e+08	0.340162	22068	0.228458	0	14	3	140545	101.268	23.6927	844
18.395	967.81	0.252776	2009.57	20.6541	2	0	34.5603	0.508955	0.000305089	271.832	3.09921e+08	0.285332	19103	0.255258	0	14.25	3	138339	101.332	23.693	845
20.7908	992.819	-0.12726	1854.27	17.6898	2	0	42.1854	0.306922	0.000340846	189.19	2.44991e+08	0.150796	29346	0.266575	0	14.5	3	136411	101.396	23.6933	846
20.8972	983.738	-0.388964	1334.32	20.4577	2	0	38.7292	0.297908	0.000340846	87.4044	2.97529e+08	0.162301	23821	0.285483	0	14.5	3	134773	101.46	23.6935	847
20.0485	962.671	-0.336686	1879.93	18.0034	1	0	50.7141	0.380549	0.000340846	395.772	1.71206e+08	0.180789	12198	0.24465	0	13.5	3	133435	101.524	23.6937	848
20.2897	1143.98	0.716218	531.014	13.6954	2	0	21.9293	0.292673	0.000242261	478.821	1.4201e+08	0.106629	19850	0.297417	0	14	4	113994	100.369	23.7424	849
20.458	1118.49	0.504726	1096.86	12.6649	2	0	22.7103	0.340367	0.000242261	482.053	2.41518e+08	0.121215	43514	0.302117	0	14	3	119071	100.434	23.743	850
20.389	1106.43	0.776765	2217.52	12.1148	2	0	27.205	0.382705	0.000242261	1495.02	2.77375e+08	0.143206	40178	0.321629	0	13	3	124286	100.498	23.7437	851
19.0519	1066.61	1.06597	1076.59	20.3095	2	0	21.2761	0.468576	0.000242261	118.154	3.46792e+08	0.181384	17515	0.298283	0	11	3	129621	100.562	23.7443	852
19.4408	1071.98	0.822855	5606.53	11.4026	2	0	30.2255	0.47832	0.000343526	1107.76	2.5955e+08	0.206317	34799	0.302783	0	11	3	135061	100.626	23.7448	853
17.3953	1034.43	0.360129	1684.7	16.5498	2	0	26.9276	0.767347	0.000423913	722.838	3.52178e+08	0.285613	11928	0.258187	0	11	2.5	140596	100.69	23.7454	854
17.7851	1035.54	0.363592	1567.48	19.9415	2	0	28.4008	0.626373	0.000423913	633.26	4.47165e+08	0.34125	16462	0.249733	0	12	3	146214	100.754	23.7459	855
20.1451	1053.36	0.496835	1467.46	20.2979	2	0	27.7387	0.386314	0.000423913	660.015	3.57302e+08	0.197608	37668	0.248113	0	12	3	151906	100.818	23.7464	856
19.0611	1020.09	0.748266	1150.86	22.111	2	0	28.3629	0.582037	0.000423913	558.083	3.93833e+08	0.216639	10953	0.2451	0	12	3	157663	100.883	23.7469	857
16.9401	992.204	0.22336	1467.05	21.2102	2	0	27.6605	0.751491	0.000423913	822.657	4.07212e+08	0.238009	10267	0.2511	0	11.5	2.5	158970	100.947	23.7474	858
16.5017	979.468	0.0565882	1069.01	19.4992	2	0	27.3087	0.855758	0.000321801	103.346	3.72714e+08	0.318992	16115	0.248758	0	11	1	156052	101.011	23.7478	859
18.1599	988.776	0.347851	1296.81	20.7679	2	0	30.2515	0.609912	0.000319875	411.402	3.48133e+08	0.251835	19678	0.197433	0	11.5	2.5	153355	101.075	23.7482	860
20.2287	1002.89	0.357959	3974.78	19.6564	2	0	34.2248	0.361003	0.00034342	176.444	3.06417e+08	0.251537	31272	0.200558	0	12	3	150872	101.139	23.7486	861
18.9391	963.352	0.0750853	1531.8	20.9571	2	0.118278	31.8272	0.540082	0.00034342	96.962	3.23657e+08	0.299658	23595	0.2771	0	12	2	148635	101.203	23.7489	862
18.0428	950.902	0.112554	1070.99	17.2025	2	0	37.0168	0.598707	0.00034342	66.1061	2.67876e+08	0.31519	32956	0.305588	0	12	2	146404	101.267	23.7492	863
19.5481	965.57	0.126654	1310.3	17.2685	2	0	38.4737	0.420027	0.00034342	204.241	2.1089e+08	0.221304	32391	0.281117	0	13.6667	2	144287	101.332	23.7495	864
20.5273	971.635	0.0505781	935.573	17.9142	2	0	28.0474	0.314784	0.000340846	85.9551	1.78821e+08	0.185679	31240	0.281117	0	15	3	142439	101.396	23.7498	865
19.1771	930.57	-0.599242	1991.36	19.5879	2	0	58.8525	0.607503	0.000340846	392.361	1.92615e+08	0.215566	16206	0.283183	0	15	3	139593	101.524	23.7502	866
20.6291	1145.24	0.951627	510.065	16.5714	2	0	23.5155	0.207398	0.000242261	104.581	1.99095e+08	0.0767924	34830	0.356933	0	12.8	4	118121	100.369	23.7988	867
21.1329	1132.73	0.800833	922.012	13.6544	2	0	24.5573	0.312672	0.000242261	854.613	2.57125e+08	0.116193	43183	0.313517	0	12.2	3	123028	100.433	23.7995	868
18.9967	1078.13	0.73654	665.661	18.1672	2	0	20.8822	0.482443	0.000242261	434.222	3.48422e+08	0.186752	27336	0.341688	0	11.5	3	128082	100.497	23.8001	869
18.5726	1055.31	0.906611	925.87	19.5394	2	0	22.7245	0.564474	0.000242261	291.378	3.45058e+08	0.218506	17838	0.319233	0	10	3	133265	100.561	23.8007	870
18.8889	1056.85	0.786141	1460.28	13.18	2	0	25.6406	0.529086	0.000343526	329.206	3.22541e+08	0.273077	27839	0.337683	0	11	3	138562	100.625	23.8013	871
17.2049	1024.66	0.680718	1226.65	17.9489	2	0	27.5436	0.788682	0.000423913	609.346	3.40667e+08	0.335826	10909	0.290804	0	11	3	143963	100.69	23.8019	872
17.8774	1026.95	0.60183	869.019	19.8063	2	0	27.0448	0.631197	0.000423913	528.025	3.56811e+08	0.390935	18150	0.2451	0	14	3	149454	100.754	23.8024	873
19.9611	1040.11	0.645204	1124.93	19.7464	2	0	28.5576	0.392301	0.000423913	699.717	3.48083e+08	0.255122	28052	0.265588	0	14	3	155027	100.818	23.8029	874
19.6144	1017.34	0.62143	1441.44	19.2744	2	0	28.9581	0.402386	0.000321801	277.503	3.25918e+08	0.244028	22250	0.252683	0	13	3	160673	100.882	23.8034	875
18.6463	990.786	0.350673	1216.97	19.9693	2	0	28.7389	0.603593	0.000321801	334.117	3.48109e+08	0.317762	11746	0.268779	0	11.75	3	164542	100.946	23.8038	876
16.0847	966.751	0.0592326	1035.3	18.8966	2	0	28.9492	0.86936	0.000339628	75.5217	3.66828e+08	0.336526	14107	0.283375	0	10.5	2.5	161724	101.01	23.8043	877
16.8135	970.596	0.195654	1039.14	19.5499	2	0	34.7435	0.726712	0.000339628	221.615	3.69362e+08	0.339509	18100	0.193808	0	10.25	2.75	159114	101.075	23.8047	878
19.9535	988.098	0.151311	1140.61	19.8292	2	0	37.2857	0.462697	0.00034342	116.467	3.01679e+08	0.305148	24643	0.217558	0	10	3	156722	101.139	23.805	879
18.1336	949.146	0.171378	1140.1	20.4338	2	0	28.6122	0.632986	0.00034342	39.9749	3.21744e+08	0.393793	13172	0.311675	0	10	2.25	154570	101.203	23.8054	880
18.0826	949.514	0.0896235	2285.85	17.817	2	0	35.3979	0.602534	0.00034342	215.124	2.48025e+08	0.326535	18592	0.283887	0	10	2	152294	101.267	23.8057	881
20.2862	971.964	-0.0416723	1037.87	17.4645	2	0	27.0032	0.28477	0.00034342	119.911	2.23794e+08	0.187397	43475	0.289171	0	10.5	2.25	150260	101.331	23.806	882
20.8915	974.145	-0.031046	932.393	19.2938	2	0	35.5274	0.234175	0.00034342	38.5699	1.98086e+08	0.120864	30081	0.292792	0	11	3.5	148487	101.396	23.8063	883
21.6738	1156.41	0.695577	816.096	17.0476	2	0	26.098	0.17765	0.000242261	297.453	1.3342e+08	0.0687676	29093	0.363967	0	11	4	122429	100.368	23.8553	884
21.1388	1125.45	0.831271	1014	17.7651	2	0	26.3479	0.274541	0.000242261	1142.76	2.76995e+08	0.106274	38317	0.420792	0	11	3	127170	100.432	23.8559	885
18.081	1053.9	0.876749	827.703	20.7145	2	0	23.9285	0.606754	0.000242261	280.389	3.26744e+08	0.252271	18941	0.402423	0	10	3	132065	100.496	23.8566	886
17.8674	1043.63	1.05907	1004.44	19.6319	2	0	24.8756	0.712332	0.000242261	342.31	3.42342e+08	0.265136	18938	0.348229	0	9	3	137097	100.561	23.8572	887
18.1913	1041.4	0.877086	1982.59	16.2912	2	0	27.4586	0.601692	0.000343526	394.703	3.04579e+08	0.289133	31583	0.370329	0	11	3	142253	100.625	23.8578	888
17.8588	1021.75	0.769669	1646.7	17.5658	2	0	27.7572	0.764319	0.000339628	76.2267	3.47978e+08	0.426046	18421	0.251969	0	11	3	147518	100.689	23.8583	889
17.0552	1012.91	0.588511	1070.76	16.7694	2	0	26.2331	0.696619	0.000339628	145.839	3.61022e+08	0.337074	13284	0.249158	0	16	3	152881	100.753	23.8589	890
19.8814	1032.21	0.614419	1377.63	18.7796	2	0	29.7992	0.389785	0.000339628	181.252	3.43103e+08	0.247451	30249	0.265229	0	16	3	158334	100.817	23.8594	891
19.6183	1014.59	0.611522	7347.1	15.6996	2	0	30.7673	0.406942	0.000339628	281.718	2.881e+08	0.199533	27564	0.301054	0	14	3	163866	100.882	23.8599	892
18.7091	984.027	0.384195	1540.82	20.0287	2	0.147847	26.6824	0.595013	0.000339628	158.513	3.40353e+08	0.350098	10627	0.295513	0	12	3	169470	100.946	23.8603	893
15.9843	959.015	0.0952388	663.189	17.3268	2	0	30.5586	0.838901	0.000339628	93.266	3.34396e+08	0.324736	13221	0.242942	0	10	3	167438	101.01	23.8607	894
16.7145	961.061	0.317197	635.403	20.714	2	0	34.2297	0.685102	0.000363998	190.798	3.47533e+08	0.350444	16860	0.211321	0	9	3	164909	101.074	23.8611	895
19.9542	981.38	0.247782	967.141	20.3152	2	0	34.652	0.467053	0.00034342	129.443	2.98481e+08	0.312282	24813	0.245027	0	8	3	162602	101.138	23.8615	896
17.5764	937.607	0.134977	1096.46	19.7076	2	0	38.1027	0.775272	0.00034342	130.132	3.0512e+08	0.336118	16617	0.26415	0	8	3	160412	101.203	23.8619	897
17.7797	940.067	0.113877	1387.52	20.1505	2	0	32.0125	0.622304	0.00034342	198.814	2.84251e+08	0.329219	20469	0.30244	0	8	3	158212	101.267	23.8622	898
19.342	950.513	0.0703568	695.567	18.8756	2	0	24.4845	0.354992	0.00034342	61.2986	2.8686e+08	0.263839	35410	0.32665	0	7.33333	3.5	156255	101.331	23.8625	899
20.5836	961.698	-0.0653934	1149.04	19.8819	2	0	33.432	0.28913	0.000330362	340.258	2.35494e+08	0.151893	21005	0.3355	0	7	3	154551	101.395	23.8627	900
18.9277	917.948	-0.301767	1725.2	23.7047	2	0	35.8905	0.642762	0.000330362	193.457	1.73713e+08	0.367293	10151	0.299967	0	0	3	153107	101.459	23.863	901
21.6443	1123.39	0.662248	1398.48	19.5566	2	0	25.8532	0.232655	0.000377504	265.166	2.22798e+08	0.0900601	36559	0.365683	0	10.75	3	131479	100.432	23.9124	902
19.675	1062	0.763911	1151.4	21.3354	2	0	23.2483	0.468516	0.000377504	89.3351	2.91879e+08	0.175107	16476	0.355083	0	9.5	3	136219	100.496	23.913	903
18.1078	1036.85	0.800056	1364.8	21.8909	2	0	26.2821	0.713004	0.000377504	117.439	3.61242e+08	0.257602	18709	0.285617	0	9	3	141104	100.56	23.9137	904
17.4261	1025	0.843136	6490.42	15.852	2	0	26.7374	0.717447	0.000377504	258.855	3.40406e+08	0.299939	27631	0.267025	0	12.5	3	146117	100.624	23.9142	905
17.9746	1013.19	0.71965	3453.81	16.593	2	0	28.9837	0.724195	3.9705e-05	23.1146	3.21347e+08	0.367334	15905	0.276842	0	12.5	3	151248	100.688	23.9148	906
17.0861	1002.25	0.691796	1195.09	17.2383	2	0	26.3163	0.707321	0.000339628	124.84	3.52665e+08	0.347517	19082	0.24195	0	14	3	156484	100.753	23.9153	907
20.0216	1023.46	0.568514	1411.58	17.3	2	0	34.5317	0.350682	0.000339628	204.726	3.1845e+08	0.234473	37336	0.300663	0	14	3	161815	100.817	23.9159	908
19.2665	992.514	0.526537	1486.4	18.0994	2	0	27.9622	0.479255	0.000339628	150.908	3.05593e+08	0.30478	21591	0.351833	0	11.5	3	167232	100.881	23.9163	909
17.213	964.97	0.199935	965.834	20.2397	2	0.266125	24.3609	0.656203	0.000339628	86.6662	3.2245e+08	0.325138	10708	0.314437	0	11.75	3	172727	100.945	23.9168	910
16.9446	953.152	0.246935	737.068	18.8885	2	0.118278	30.1529	0.72456	0.000363998	214.31	2.84933e+08	0.289824	16288	0.280833	0	12	3	173182	101.01	23.9172	911
17.6116	949.985	0.466121	566.302	21.0047	2	0	32.5309	0.615205	0.000363998	149.628	3.04949e+08	0.31435	16753	0.286125	0	10.75	3	170736	101.074	23.9176	912
19.8058	967.977	0.303899	1073.36	20.7877	2	0	38.3274	0.453814	0.00034342	145.891	2.82579e+08	0.30343	25464	0.314429	0	9.5	3	168510	101.138	23.918	913
17.6767	930.742	0.162528	1220.83	20.5802	2	0	30.1057	0.723791	0.00034342	172.091	3.00491e+08	0.350221	13117	0.291533	0	9	3	166277	101.202	23.9183	914
17.4106	932.41	0.0464491	1348.01	20.3139	2	0	26.5618	0.623704	0.00034342	76.6577	2.65791e+08	0.321912	17314	0.364596	0	8.5	3	164155	101.267	23.9187	915
19.5471	945.526	0.0552841	1446.99	21.8956	2	0	32.9465	0.372545	0.00034342	66.2163	2.7776e+08	0.271117	23645	0.329425	0	7.5	4	162270	101.331	23.9189	916
19.6027	924.78	-0.180837	2256.04	23.1592	2	0	40.744	0.497472	0.000330362	402.656	2.57621e+08	0.301693	15297	0.333762	0	7	3.5	160630	101.395	23.9192	917
17.3218	906.422	-0.342284	3555.66	21.5868	2	0	42.434	0.750223	0.000330362	498.212	2.50023e+08	0.313642	11506	0.370875	0	0	2	159241	101.459	23.9195	918
15.6827	913.995	-0.592714	1038.2	23.3377	2	0	38.01	0.824544	0.000330362	51.6699	1.11393e+08	0.354642	4145	0.314617	0	0	2	158111	101.523	23.9197	919
20.9545	1097.18	0.524868	1959.57	21.1546	2	0	26.6498	0.27095	0.000431061	278.986	3.05602e+08	0.0734186	27031	0.380108	0	13	3	135939	100.431	23.9689	920
19.4211	1046.22	0.596674	787.572	21.8778	2	0	24.5228	0.439173	0.000377504	58.9645	2.96822e+08	0.18308	21782	0.370758	0	9	3	140529	100.495	23.9695	921
18.315	1023.95	0.628969	1345.11	21.2415	2	0	28.2541	0.67281	0.000377504	160.554	3.43413e+08	0.282766	18304	0.246142	0	9	3	145269	100.559	23.9701	922
16.1972	1006.49	0.972054	1952.23	19.3456	2	0	30.6641	0.884906	0.000377504	190.087	3.74038e+08	0.287737	14131	0.259842	0	14	2.75	150144	100.624	23.9707	923
18.0352	1006.82	0.832575	2604.45	13.9252	2	0	28.662	0.669347	3.9705e-05	29.8994	2.85442e+08	0.310923	26916	0.270792	0	14	2.75	155141	100.688	23.9713	924
18.3368	999.492	0.646024	1679.21	16.6944	2	0	28.3894	0.517537	3.9705e-05	21.0113	3.09704e+08	0.328552	29428	0.233833	0	12	3	160250	100.752	23.9718	925
20.2427	1015.31	0.607146	2679.55	13.0472	2	0	34.3467	0.352948	3.9705e-05	46.1483	2.6548e+08	0.182167	54180	0.274825	0	12	3.25	165460	100.816	23.9723	926
18.7592	977.421	0.435844	1379.37	19.8213	2	0	27.1117	0.504491	3.9705e-05	20.3071	3.09367e+08	0.318968	17467	0.290492	0	9	3	170761	100.881	23.9728	927
16.6804	956.248	0.270794	978.708	20.2407	2	0	25.307	0.727489	0.000339628	83.1414	3.4963e+08	0.317945	12573	0.290863	0	11.6667	2.75	176146	100.945	23.9733	928
17.6858	953.863	0.125115	729.537	20.9124	2	0	28.8493	0.671349	0.000363998	158.365	3.12578e+08	0.374223	22980	0.273517	0	14	3.5	178959	101.009	23.9737	929
18.7973	954.148	0.44236	1468.34	19.9515	2	0.0887083	28.0919	0.437264	0.000363998	128.263	2.66854e+08	0.296211	28982	0.253492	0	12.5	3.25	176593	101.073	23.9741	930
19.8937	962.829	0.386517	8312.29	16.8146	2	0.0295694	33.809	0.33335	0.00034342	164.707	2.74815e+08	0.205506	25925	0.323804	0	11	3	174438	101.138	23.9745	931
17.6808	929.276	0.320584	918.849	22.5949	2	0	22.9551	0.488817	0.00034342	43.0881	2.98048e+08	0.317619	15097	0.321375	0	10	3	172169	101.202	23.9748	932
19.4836	945.302	0.368344	3358.93	19.6002	2	0	31.1261	0.316745	0.000363998	169.103	2.46593e+08	0.200636	24825	0.310363	0	9	4	170121	101.266	23.9751	933
20.5061	943.439	0.16246	4246.09	21.2554	2	0	37.7257	0.378845	0.000359174	553.309	2.45989e+08	0.129052	14506	0.295733	0	7.66667	3.75	168303	101.33	23.9754	934
18.3612	903.669	-0.0429443	2202.29	22.5579	1	0	49.7635	0.686441	0.000330362	641.495	2.41842e+08	0.265719	5122	0.314063	0	7	3	166721	101.395	23.9757	935
15.5193	906.893	-0.523509	1131.03	25.278	2	0	35.6481	0.82159	0.000330362	135.949	2.4795e+08	0.353372	5544	0.306392	0	0	2	165384	101.459	23.9759	936
18.4659	1042.05	0.600626	2533.35	25.509	2	0.266125	25.1048	0.501263	0.000431061	199.736	3.64913e+08	0.15523	12292	0.317867	0	13	3	140537	100.43	24.0253	937
20.369	1050.56	0.565273	2248.37	22.3898	2	0	30.9899	0.392065	0.000431061	306.078	2.83418e+08	0.135506	26580	0.317867	0	9	3	144981	100.494	24.026	938
18.6221	1011.66	0.62264	1489.73	23.0623	2	0	28.0725	0.61271	0.000431061	213.538	3.47154e+08	0.279531	14538	0.283979	0	7.25	3	149580	100.559	24.0266	939
16.3032	994.086	0.699747	1610.19	18.6329	2	0	34.9931	0.945712	0.000431061	364.431	4.05615e+08	0.341677	15440	0.216167	0	12	3.5	154318	100.623	24.0272	940
16.4231	993.821	0.674322	1468.97	19.8677	2	0	28.9622	0.867056	3.9705e-05	16.3321	3.93305e+08	0.312487	20180	0.247304	0	12	2.5	159185	100.687	24.0277	941
18.8712	1002.34	0.528602	2736.1	17.42	2	0	29.2205	0.481638	3.9705e-05	30.6688	3.06882e+08	0.253559	41645	0.199258	0	11	3	164168	100.752	24.0283	942
20.22	1007.89	0.476665	13933.4	9.94243	1	0	31.5875	0.361498	3.9705e-05	62.6311	1.7976e+08	0.181915	55967	0.288633	0	11	3	169257	100.816	24.0288	943
18.1301	960.498	0.438558	1540.59	22.8135	2	0.0295694	26.6602	0.62352	3.9705e-05	14.8834	3.24629e+08	0.366871	10595	0.27525	0	10.5	3	174443	100.88	24.0293	944
15.7832	948.973	0.299918	1150.92	20.3706	2	0.147847	25.8997	0.822416	0.000401745	123.238	3.6528e+08	0.300163	13769	0.284246	0	12.3333	3	179717	100.944	24.0297	945
17.3383	946.712	0.309232	1037.68	20.2541	2	0	27.788	0.690264	0.000401745	187.954	2.99418e+08	0.32886	20441	0.243492	0	14.5	3	184767	101.009	24.0302	946
19.2785	962	0.337613	8072.92	16.1823	2	0.0591388	30.9648	0.393726	0.000401745	228.553	2.59336e+08	0.223535	39520	0.281704	0	12.75	3.5	182477	101.073	24.0306	947
19.1621	945.52	0.512675	12162.2	18.4832	2	0	25.3613	0.402667	0.000363998	83.551	3.30662e+08	0.243159	20390	0.320198	0	11	3	180280	101.137	24.0309	948
19.1738	938.68	0.218043	1497.58	20.1322	2	0	27.646	0.306215	0.000363998	166.074	2.52109e+08	0.185704	22015	0.307287	0	9.5	3.5	178086	101.202	24.0313	949
20.5519	944.327	0.252761	3781.39	17.3291	1	0	34.8037	0.296577	0.000359174	744.083	1.99049e+08	0.068032	18038	0.288658	0	8	3	176107	101.266	24.0316	950
18.9406	909.095	0.27808	1944.57	24.2746	1	0	43.102	0.630037	0.000359174	668.654	2.54787e+08	0.258232	7491	0.321012	0	7	3	174351	101.33	24.0319	951
16.2364	902.777	-0.035881	1543.93	23.4705	2	0.0887083	41.1504	0.791689	0.000359174	329.182	2.56964e+08	0.30646	6059	0.317333	0	6.5	2	172825	101.394	24.0322	952
20.4387	1041.31	0.756435	1093.81	22.4691	2	0	35.3013	0.399424	0.000431061	199.346	2.55267e+08	0.154616	10982	0.302692	0	7	3	149562	100.494	24.0824	953
18.1939	997.471	0.664938	1620.28	21.4918	2	0	34.9769	0.680776	0.000431061	277.67	3.15008e+08	0.263526	18184	0.281542	0	6.5	3	154024	100.558	24.0831	954
17.1914	982.917	0.71218	1756.3	18.5661	2	0	36.8871	0.835827	0.000431061	530.004	3.07094e+08	0.333657	13291	0.271117	0	7	3	158630	100.622	24.0836	955
16.0382	977.663	0.449401	1540.11	21.0336	2	0	34.6315	0.918675	0.000431061	393.644	3.34532e+08	0.367879	9967	0.322725	0	7	2.5	163368	100.687	24.0842	956
17.8604	981.44	0.330369	1851.12	20.5078	2	0	28.6858	0.64029	3.9705e-05	14.3952	3.02006e+08	0.427335	20120	0.3171	0	9	3	168227	100.751	24.0848	957
19.7401	986.91	0.515305	4120.76	14.4719	2	0	29.1034	0.433638	3.9705e-05	42.0315	2.36037e+08	0.238877	34445	0.308683	0	9	3	173197	100.815	24.0853	958
17.4841	946.979	0.452066	1207.59	21.9712	2	0	29.0186	0.673377	0.000401745	132.909	3.24451e+08	0.39582	6338	0.302925	0	12	3	178269	100.88	24.0857	959
16.3478	938.446	0.111314	705.538	21.46	2	0.0591388	28.0578	0.725579	0.000401745	135.934	3.32479e+08	0.341055	11185	0.302925	0	13.5	3	183433	100.944	24.0862	960
18.2541	944.602	0.0192188	1282.9	19.9831	2	0	29.3963	0.507455	0.000401745	190.752	2.58239e+08	0.345454	28734	0.267246	0	15	4	188683	101.008	24.0866	961
20.0714	957.036	0.18553	1610.11	14.6019	2	0	34.1438	0.359603	0.000401745	355.145	2.56761e+08	0.213152	39289	0.309517	0	14	3.5	188384	101.073	24.087	962
18.208	922.443	0.290536	882.526	23.444	2	0	23.07	0.444944	0.000401745	100.829	3.07457e+08	0.316915	12223	0.300229	0	13	4	186150	101.137	24.0874	963
20.0765	941.802	0.219521	3071.19	17.1475	2	0	32.1934	0.336983	0.000359174	531.191	2.18819e+08	0.152186	25354	0.3186	0	10.5	4	184025	101.201	24.0878	964
18.8312	913.13	-0.215505	2168.49	22.0961	2	0	38.4371	0.554995	0.000359174	620.825	2.39504e+08	0.163276	8153	0.268725	0	8	4	182111	101.266	24.0881	965
17.0904	898.161	-0.0154384	1869.02	22.6947	1	0	43.1684	0.811917	0.000359174	643.376	2.75912e+08	0.31429	7348	0.302508	0	8.33333	2.5	180413	101.33	24.0884	966
13.7049	908.881	-0.0382291	450.134	24.225	2	0.236555	39.5032	0.884928	0.000359174	46.4512	1.90418e+08	0.342553	4874	0	0	10	1	178939	101.394	24.0887	967
17.6874	994.052	0.477644	2036.82	22.2297	1	0	40.1893	0.768254	0.000431061	621.13	3.34474e+08	0.297388	6980	0.284642	0	6.5	4	158591	100.557	24.1395	968
17.0567	978.259	0.668001	1908.82	18.0083	1	0	38.4088	0.790709	0.000431061	651.928	3.18076e+08	0.336689	23183	0.211092	0	7	3.25	163068	100.622	24.1401	969
16.2743	968.936	0.630216	1652.06	19.5548	1	0	37.4114	0.935588	0.000431061	610.668	3.22246e+08	0.362163	15213	0.313554	0	7	3	167681	100.686	24.1407	970
17.4652	974.116	0.361479	1331.92	23.9907	2	0	34.3887	0.755941	3.9705e-05	30.0704	3.00739e+08	0.426393	26275	0.34755	0	9	3.5	172418	100.75	24.1412	971
19.0923	970.12	0.355789	1676.08	16.9121	2	0	31.6015	0.488002	3.9705e-05	36.2815	2.57615e+08	0.264466	37816	0.336258	0	9	4	177271	100.815	24.1417	972
17.2952	936.249	0.519669	1251.09	18.3093	2	0	31.4904	0.71076	0.000401745	282.795	2.81639e+08	0.330159	8708	0.277858	0	12	3.5	182229	100.879	24.1422	973
18.4593	939.645	0.163623	1200.93	19.54	2	0	28.6243	0.524545	0.000401745	361.421	2.81427e+08	0.333001	13459	0.277858	0	13.5	3.5	187284	100.943	24.1427	974
19.7531	948.781	0.105914	7065.62	16.5468	2	0	34.3377	0.354026	0.000401745	304.113	2.49582e+08	0.196428	36594	0.246229	0	15	4	192429	101.008	24.1431	975
19.4379	936.638	0.261786	3573.8	18.2584	2	0	27.5091	0.412807	0.000401745	239.521	2.71025e+08	0.25898	18219	0.333358	0	14	3.75	194301	101.072	24.1435	976
17.3396	915.32	0.0432603	1010.21	22.8379	2	0	25.4454	0.453195	0.000401745	97.0841	3.08985e+08	0.314564	9804	0.320508	0	13	4	192044	101.137	24.1439	977
19.7953	922.855	-0.163198	3143.55	21.1146	2	0	38.5464	0.473905	0.000467719	410.625	2.18635e+08	0.170344	20919	0.298	0	10.5	4	189985	101.201	24.1442	978
17.4475	896.627	-0.058247	3444.13	22.7243	2	0	37.2482	0.767059	0.000324857	803.743	2.54272e+08	0.296926	11177	0.2748	0	8	4	188131	101.265	24.1446	979
15.0642	905.592	0.0132461	1338.59	24.0829	2	0.325264	30.1311	0.891992	0.000324857	153.275	3.27002e+08	0.345287	8052	0.3875	0	8.33333	1.75	186489	101.33	24.1449	980
19.635	1008.86	0.267024	2475.34	23.8345	1	0	33.9651	0.564139	0.000431061	691.528	2.72251e+08	0.241774	11950	0.314375	0	8	4	163269	100.557	24.196	981
17.9636	966.343	0.302818	1581.24	20.6622	2	0	34.0917	0.742615	0.000431061	566.337	2.77459e+08	0.393932	16285	0.273375	0	5	3.5	167622	100.621	24.1966	982
16.4602	955.249	0.380039	1246.47	22.8074	2	0	32.6006	0.784425	0.000431061	412.323	3.3449e+08	0.3854	13764	0.2944	0	5	4	172112	100.686	24.1971	983
17.4355	951.602	0.401337	1552.5	22.6047	2	0	34.7626	0.658608	3.9705e-05	49.147	3.00913e+08	0.305934	26305	0.289775	0	6	4	176731	100.75	24.1977	984
18.6652	953.609	0.229536	1572.13	16.0512	2	0.0591388	26.8275	0.584759	3.9705e-05	37.7078	2.50834e+08	0.279175	25857	0.3045	0	6	3	181468	100.814	24.1982	985
17.2821	926.555	0.258748	904.511	16.3269	2	0	27.5775	0.682425	0.000401745	181.842	2.75087e+08	0.264164	27697	0.247608	0	9	4	186315	100.879	24.1987	986
18.4327	929.724	0.043807	2455.72	18.37	2	0	26.4304	0.497368	0.000401745	139.083	2.84554e+08	0.284944	25873	0.247608	0	8.2	4	191262	100.943	24.1991	987
19.9749	943.929	0.051607	6185.58	12.9331	2	0	31.872	0.368764	0.000401745	477.725	2.0176e+08	0.16178	33612	0.284833	0	7	4	196302	101.007	24.1996	988
18.0051	912.193	0.0766932	1565.8	22.6962	2	0	24.864	0.529317	0.000401745	59.5098	2.98919e+08	0.327835	9077	0.325117	0	8.5	4	200150	101.072	24.2	989
18.0029	910.25	-0.183074	2371.9	19.732	2	0	31.1928	0.472008	0.000401745	283.989	2.6815e+08	0.236452	20256	0.287621	0	10	4	197960	101.136	24.2004	990
19.0952	901.281	-0.196911	3864.92	22.5305	1	0	36.7406	0.584018	0.000467719	440.525	2.62092e+08	0.184206	11869	0.253717	0	10	4	195963	101.201	24.2007	991
17.2055	894.677	-0.226019	4081	24.6629	2	0.0887083	36.6497	0.759436	0.000324857	793.352	2.74838e+08	0.254779	6793	0.322175	0	10	3	194166	101.265	24.201	992
12.8817	918.083	-0.109099	766.978	26.4202	2	0.413972	20.8772	0.836552	0.000324857	17.5632	2.53424e+08	0.323827	5273	0.347908	0	10	1	192575	101.329	24.2013	993
18.8973	984.013	0.245366	4607.07	20.2546	1	0	32.5859	0.573022	0.000431061	638.321	2.69802e+08	0.260959	10452	0.265879	0	8	4	168051	100.556	24.2524	994
18.3407	966.271	0.558545	2966.04	22.9624	2	0	37.1253	0.669725	0.000431061	440.536	3.00533e+08	0.331838	11828	0.265592	0	5	3.5	172282	100.621	24.253	995
18.5972	957.643	0.449751	2667.77	21.6914	2	0	34.2822	0.629046	0.000431061	578.334	2.999e+08	0.349019	14625	0.300008	0	5	4	176655	100.685	24.2536	996
16.7812	937.239	0.446755	1646.57	19.3956	2	0.0295694	26.5558	0.770045	0.00044362	194.92	2.99143e+08	0.345775	17444	0.310142	0	6	3	181158	100.749	24.2542	997
16.4508	932.259	0.316384	745.217	18.1855	2	0.443541	24.0597	0.786317	0.000401745	70.2512	3.16762e+08	0.325373	16223	0.302292	0	6	2.5	185782	100.814	24.2547	998
17.3813	929.441	0.252009	984.333	20.6412	2	0	27.6034	0.651053	0.000401745	173.838	2.88538e+08	0.393782	29714	0.233538	0	9	4	190519	100.878	24.2552	999
19.3762	942.898	0.104159	7342.91	12.3526	2	0	32.5255	0.381901	0.000401745	452.147	3.13369e+08	0.159204	42214	0.233538	0	8.33333	4	195359	100.943	24.2556	1000
19.422	928.818	-0.162876	3699.7	16.2591	2	0	26.5325	0.384947	0.000401745	255.283	2.61418e+08	0.220948	22664	0.257592	0	7	3	200297	101.007	24.2561	1001
17.7681	904.325	-0.0606264	3585.99	19.9131	2	0	29.6151	0.498843	0.000401745	232.38	3.04759e+08	0.293513	15045	0.264213	0	8.5	4	205324	101.071	24.2565	1002
19.3906	904.321	-0.000625857	7734.84	18.6493	1	0	36.1693	0.536737	0.000467719	490.619	2.44271e+08	0.145439	25835	0.25356	0	10	4	203896	101.136	24.2568	1003
17.6615	891	-0.249622	3675.12	22.925	1	0	37.1197	0.756027	0.000467719	506.016	2.92235e+08	0.240396	8258	0.356967	0	10	3	201958	101.2	24.2572	1004
15.3854	898.125	-0.385027	2161.71	24.5747	2	0.384403	30.0672	0.875175	0.000467719	106.64	3.43301e+08	0.349044	8863	0.370028	0	10	2	200215	101.265	24.2575	1005
18.2374	972.363	0.29529	5426.04	20.4019	1	0	34.9732	0.701136	0.000490875	1259.7	2.65804e+08	0.229	10205	0.303242	0	8	3.5	172926	100.556	24.3089	1006
17.3974	958.754	0.462581	4311	20.5464	2	0	34.2465	0.704044	0.000490875	875.195	2.72338e+08	0.300726	15409	0.253096	0	7	3.5	177041	100.62	24.3095	1007
17.8726	952.248	0.661245	2751.84	22.49	2	0	28.4522	0.618941	0.00044362	230.28	3.3778e+08	0.295494	9104	0.286431	0	7	2.5	181299	100.684	24.3101	1008
14.5443	946.751	0.607421	878.7	20.4801	2	0.887083	21.636	0.881156	0.00044362	8.05953	4.01905e+08	0.327449	10550	0.288321	0	5.5	2	185689	100.749	24.3106	1009
15.3378	934.593	0.502277	580.947	21.7511	2	0.857513	21.2586	0.863457	0.000401745	37.1833	3.5391e+08	0.412231	16418	0.324033	0	5.5	2.5	190203	100.813	24.3111	1010
18.0161	933.329	0.478885	2312.52	20.2229	2	0	27.774	0.503867	0.000401745	140.667	3.0344e+08	0.319874	28831	0.29445	0	5	4	194833	100.878	24.3116	1011
19.9983	943.604	0.216988	13422.6	10.5716	1	0	31.7815	0.347181	0.000401745	535.876	2.90615e+08	0.123193	38885	0.29445	0	5	4	199569	100.942	24.3121	1012
17.7809	900.098	0.0130526	2182.71	21.0624	2	0	24.6904	0.503661	0.000401745	132.992	3.06377e+08	0.327542	11651	0.309979	0	5	3.5	204405	101.007	24.3125	1013
18.6006	902.904	0.102378	5524.04	15.3761	2	0	34.5547	0.489584	0.000467719	410.755	2.35787e+08	0.156841	29393	0.258233	0	6.25	3.75	209333	101.071	24.3129	1014
17.9078	885.43	-0.0587164	4144.59	20.156	1	0	37.0028	0.71094	0.000467719	585.359	2.36343e+08	0.17994	13330	0.285596	0	7.5	3.5	209851	101.135	24.3133	1015
15.2664	899.5	-0.304807	1581.51	24.1595	2	0.384403	29.3695	0.871828	0.000467719	92.1736	3.2448e+08	0.281235	7496	0.301658	0	7	2.33333	207968	101.2	24.3137	1016
17.5401	960.587	0.233348	3664.55	21.1005	2	0	37.2943	0.781414	0.000490875	898.152	3.14505e+08	0.290383	9596	0.274587	0	8	4	177888	100.555	24.3654	1017
17.167	948.064	0.51805	4831.44	21.4718	2	0	34.6337	0.758613	0.00044362	320.792	3.15271e+08	0.283531	12396	0.29325	0	7	3.5	181891	100.619	24.366	1018
14.4918	956.473	0.428604	1771.21	29.266	2	0.561819	23.5559	0.84016	0.000431183	79.0888	4.61265e+08	0.335386	7452	0.314312	0	7	1	186037	100.684	24.3665	1019
13.4695	951.07	0.451389	714.83	23.105	2	0.709666	26.6947	0.972074	0.000431183	62.1259	3.96091e+08	0.376287	13123	0.408317	0	6	1.5	190319	100.748	24.3671	1020
15.244	931.654	0.436179	683.01	23.7682	2	0.0887083	23.687	0.739803	0.000401745	41.1136	3.27599e+08	0.410471	16919	0.371525	0	6	3.5	194725	100.813	24.3676	1021
19.0858	939.573	0.276818	11997.9	10.4802	1	0	35.2704	0.392591	0.000401745	624.976	2.80136e+08	0.115498	36444	0.350283	0	5	4	199250	100.877	24.3681	1022
18.9977	913.11	0.221098	5076.29	17.2013	2	0	28.9279	0.450715	0.000401745	176.924	3.33484e+08	0.273337	21928	0.350283	0	5	3.5	203883	100.942	24.3686	1023
18.2476	894.417	0.023407	4726.06	14.3172	2	0	35.3826	0.538818	0.000401745	427.104	2.07534e+08	0.187717	29718	0.303163	0	5	4	208619	101.006	24.369	1024
18.2068	883.664	0.0950969	5058.85	18.1091	2	0	36.6149	0.672176	0.000485885	304.213	2.38495e+08	0.195148	22084	0.268892	0	6	3.5	213450	101.071	24.3694	1025
16.3241	885.998	0.126831	2370.45	21.213	2	0.206986	40.4226	0.853705	0.000467719	373.38	2.4974e+08	0.206542	8402	0.2455	0	7	2	215823	101.135	24.3698	1026
17.7199	948.471	0.166815	2640.44	21.0511	1	0	36.6309	0.635936	0.000437321	559.805	2.76492e+08	0.167395	13882	0.263121	0	7	4	182929	100.554	24.4218	1027
17.0746	939.65	0.249589	2539.14	23.8878	1	0	32.9103	0.741562	0.000437321	437.164	3.28383e+08	0.229645	9166	0.31755	0	6	3.5	186824	100.619	24.4224	1028
12.8728	959.073	0.476053	1113.49	27.4117	2	0.620958	22.1954	0.908471	0.000437321	65.7499	4.84625e+08	0.351666	9458	0.288829	0	6	1	190864	100.683	24.423	1029
15.2383	929.943	0.392128	703.21	27.2092	2	0.0295694	26.9098	0.79615	0.000431183	93.9244	3.89109e+08	0.361019	13255	0.33995	0	5	2	195039	100.748	24.4236	1030
17.4307	918.496	0.239665	10819	20.7065	2	0	32.1549	0.547281	0.000431183	111.996	2.87828e+08	0.330487	20900	0.323237	0	5	4	199341	100.812	24.4241	1031
19.6489	928.129	0.0363501	23301.7	11.9919	1	0	34.9936	0.367271	0.000401745	530.814	2.18958e+08	0.137092	49038	0.302867	0	4.5	4	203763	100.877	24.4246	1032
18.2539	893.248	-0.0385459	3172.7	19.4631	2	0	30.5529	0.541805	0.000401745	212.256	2.45132e+08	0.372855	42312	0.302867	0	4.5	3.5	208296	100.941	24.425	1033
17.9162	882.36	0.0556421	3078.86	17.0986	2	0	45.4362	0.65062	0.000390673	449.477	2.24134e+08	0.222793	26065	0.2853	0	4.5	3	212934	101.006	24.4255	1034
16.2274	884.24	0.116389	2656.42	19.4769	1	0.147847	45.8232	0.878919	0.000390673	457.199	2.55285e+08	0.170113	13760	0.281275	0	5.33333	2.5	217670	101.07	24.4259	1035
19.98	976.034	0.294994	2546.86	22.9559	2	0	29.997	0.392091	0.000437321	247.977	2.60763e+08	0.1366	18222	0.309775	0	6	4	188043	100.554	24.4783	1036
17.4807	928.088	0.34233	2290.28	26.5961	2	0.0295694	31.0027	0.752245	0.000437321	384.213	3.14565e+08	0.203834	6378	0.318942	0	3	3	191834	100.618	24.4789	1037
13.0325	948.221	0.253762	640.431	28.6193	2	0.887083	22.1862	0.798607	0.000437321	52.6976	4.55453e+08	0.309138	10059	0.272622	0	3	2	195771	100.683	24.4795	1038
16.7669	916.323	0.0414052	1150.92	23.6515	2	0	32.5025	0.694699	0.000431183	235.999	2.99625e+08	0.303614	22693	0.211833	0	4	3.5	199843	100.747	24.48	1039
18.9887	918.73	0.196575	18330.5	14.1158	2	0	35.4835	0.411211	0.000431183	225.068	3.38651e+08	0.153873	40259	0.283923	0	4	4	204045	100.812	24.4805	1040
18.0531	895.506	0.0848164	4938.48	21.2219	2	0	27.6981	0.487517	0.000390673	110.299	3.11248e+08	0.283074	24062	0.30705	0	4	4	208367	100.876	24.481	1041
18.2084	887.941	-0.13757	4995.85	18.3824	1	0	38.994	0.587211	0.000390673	509.761	2.19374e+08	0.327323	45075	0.30705	0	4	3.75	212802	100.941	24.4815	1042
16.3616	880.443	-0.384141	2903.88	20.349	2	0.0295694	41.7526	0.866939	0.000390673	360.294	2.86403e+08	0.313217	13238	0.278675	0	4	2.5	217343	101.005	24.4819	1043
19.5859	951.729	0.511419	2624.03	24.0385	2	0	32.6293	0.458089	0.000437321	312.082	2.77917e+08	0.182698	14399	0.2944	0	6	4	193210	100.553	24.5347	1044
15.1687	930.56	0.262599	1141.34	28.8895	2	0.680097	25.1487	0.774612	0.000372147	95.402	4.02962e+08	0.263868	7929	0.312183	0	3	2.5	196916	100.617	24.5354	1045
14.7326	924.307	0.183406	1248.96	28.0083	2	0.473111	27.8429	0.749757	0.000372147	97.0407	3.54861e+08	0.300978	16453	0.298142	0	3	3	200753	100.682	24.5359	1046
17.672	905.138	0.154985	2458.38	19.8831	2	0	34.3983	0.596736	0.000431183	243.683	2.44003e+08	0.197995	32088	0.215533	0	4	3.5	204726	100.747	24.5365	1047
19.2711	904.096	0.323668	4095.59	17.1169	2	0	36.4647	0.430001	0.000431183	194.163	2.75689e+08	0.153136	43100	0.296962	0	4	4	208829	100.811	24.537	1048
17.1428	878.308	0.0434945	2519.61	21.999	2	0	27.1479	0.709237	0.000390673	143.422	3.0348e+08	0.244039	25581	0.309483	0	5.5	4	213054	100.876	24.5375	1049
17.3129	877.484	0.055537	4481.82	20.274	1	0	36.3947	0.746562	0.000390673	628.175	2.45732e+08	0.288992	24587	0.309483	0	5.33333	3.5	217394	100.94	24.538	1050
14.5027	885.464	-0.0876176	2124.75	16.772	2	0.561819	36.4902	0.934299	0.000390673	143.774	3.34629e+08	0.349609	18129	0.270387	0	5	2	221841	101.005	24.5384	1051
20.0225	981.37	0.507361	4383.59	18.5024	2	0	33.6666	0.330646	0.000440892	341.175	1.78096e+08	0.101046	27823	0.226683	0	8	4	194961	100.488	24.5906	1052
17.7758	930.652	0.454463	2065.79	26.6851	2	0.118278	31.7201	0.578844	0.000440892	474.488	3.10645e+08	0.182056	11363	0.324821	0	7.66667	3	198434	100.552	24.5912	1053
13.7181	931.971	0.32278	944.946	26.2034	2	0.739236	24.0764	0.81414	0.000372147	42.0956	3.989e+08	0.326018	12212	0.368667	0	7	2.5	202059	100.617	24.5918	1054
15.6085	909.218	0.205534	1763.5	26.0243	2	0.0591388	33.1488	0.764214	0.000372147	188.636	3.16982e+08	0.295825	17993	0.320504	0	7	3	205804	100.681	24.5924	1055
18.0707	898.54	0.261294	2881.81	20.7924	2	0	34.9769	0.541606	0.000372147	139.996	2.45335e+08	0.209654	35175	0.260283	0	6	3.5	209682	100.746	24.5929	1056
18.5699	884.475	0.113872	2909.39	21.8872	2	0	28.9425	0.501819	0.000372147	80.8339	3.03504e+08	0.194253	24207	0.301983	0	6	4	213690	100.811	24.5935	1057
17.4804	869.144	-0.0862794	2519.92	21.2958	2	0	31.6653	0.665378	0.000431183	157.985	2.75695e+08	0.257566	21145	0.355775	0	7	4	217821	100.875	24.594	1058
16.0668	869.361	-0.118786	2949.41	21.9843	1	0	33.9039	0.881567	0.000390673	580.581	2.54546e+08	0.341252	11973	0.355775	0	6.66667	2.5	222067	100.94	24.5944	1059
13.5073	886.874	-0.0564895	1070.62	20.4217	2	0.295694	29.2461	1	0.000390673	27.0986	1.81392e+08	0.387097	7149	0.324983	0	6	2	226423	101.004	24.5949	1060
19.3384	946.184	0.426237	7606.42	22.1465	2	0	35.7449	0.492961	0.000440892	465.773	2.49946e+08	0.148418	23744	0.3114	0	8	3.75	200335	100.487	24.647	1061
15.1552	922.924	0.531631	1625.98	28.2686	2	0.53225	26.9375	0.78182	0.00039243	117.247	3.92127e+08	0.324257	9627	0.327692	0	7.66667	2.5	203717	100.552	24.6477	1062
15.328	908.756	0.624173	2461.97	23.8636	2	0.177417	37.653	0.870536	0.000372147	202.455	2.96245e+08	0.285138	13170	0.32685	0	7	3.25	207249	100.616	24.6483	1063
16.7413	899.329	0.371457	2230.83	22.2054	2	0	34.1283	0.655941	0.000372147	203.963	2.66366e+08	0.253913	29511	0.302767	0	7	3.5	210921	100.681	24.6489	1064
18.6434	891.766	0.143273	2265.72	19.5897	2	0	32.6167	0.537337	0.000372147	134.85	2.22451e+08	0.208001	39973	0.291808	0	6	3.75	214706	100.745	24.6494	1065
17.5577	873.496	0.211341	1787.66	20.9406	2	0	31.6142	0.626482	0.000372147	84.9806	2.66951e+08	0.242509	21816	0.309492	0	6	4	218622	100.81	24.6499	1066
17.4867	868.004	0.0111265	2977	22.2628	1	0	33.5314	0.743207	0.000272721	557.136	2.52386e+08	0.287693	24016	0.349042	0	7	3.5	222661	100.875	24.6504	1067
14.6818	876.198	-0.127035	2405.93	21.0805	2	0.236555	31.1555	0.982465	0.000272721	336.176	2.75505e+08	0.394395	7475	0.349042	0	6.66667	2	226817	100.939	24.6509	1068
19.8678	958.609	0.644073	1460.5	22.6332	2	0	29.8539	0.440959	0.000440892	206.211	1.52958e+08	0.0602449	21588	0.348208	0	0	4	202623	100.422	24.7028	1069
17.1997	917.494	0.563338	1875.46	26.776	2	0	34.0298	0.755459	0.000440892	306.166	2.99314e+08	0.20168	15223	0.348208	0	0	2.5	205759	100.486	24.7035	1070
14.2371	919.883	0.69318	1670.39	24.4478	2	0.295694	29.1759	0.892943	0.00039243	98.0579	2.4363e+08	0.325323	9128	0.321404	0	0	0	209053	100.551	24.7041	1071
16.6833	894.13	0.65729	6256.37	21.7665	1	0	36.6388	0.792818	0.000372147	301.803	2.43698e+08	0.169323	24431	0.297867	0	7	3.5	212497	100.616	24.7047	1072
17.7764	886.688	0.552708	3239.67	21.2337	2	0	39.4759	0.641857	0.000372147	199.267	2.66749e+08	0.210236	26216	0.298183	0	7	4	216084	100.68	24.7053	1073
16.6885	874.905	0.364182	1591.28	20.9075	2	0	36.2996	0.733039	0.000372147	104.784	2.75442e+08	0.283757	20893	0.385479	0	4	3	219793	100.745	24.7059	1074
17.1428	870.667	0.440656	1647.64	22.0812	2	0	37.1144	0.742676	0.000372147	139.386	2.2735e+08	0.287487	24780	0.307279	0	4	4	223620	100.81	24.7064	1075
16.2223	866.608	0.271389	2599.45	21.8705	1	0	39.0086	0.88628	0.000272721	542.096	2.46911e+08	0.343076	17845	0.331892	0	4	2.5	227570	100.874	24.7069	1076
13.354	885.269	0.0237589	1045.68	19.9707	2	0.50268	24.0052	0.983	0.000272721	39.4252	2.72679e+08	0.380516	8620	0.331892	0	4	2	231638	100.939	24.7074	1077
15.4897	885.825	0.567425	3501.34	21.3846	1	0	38.1755	0.933311	0.00039243	415.908	2.89205e+08	0.317928	16936	0.311921	0	7	2	221299	100.68	24.7618	1078
15.4306	882.741	0.500129	1926.78	19.4186	2	0	35.5881	0.937879	0.00039243	286.454	2.04017e+08	0.36305	19008	0	0	4	2	224936	100.744	24.7623	1079
